1  
2  
3  
4  
5  
6  
7  
8  
9  
10  
11  
12  
13  
14  
15  
16  
17  
18  
19  
20  
21  
22  
23  
24  
25  
26  
27  
28  
29  
30  
31  
32  
33  
34  
35  
36  
37  
38  
39  
40  
41  
42  
43  
44  
45  
46  
47  
48  
49  
50

## Progenitor cell integration into a barrier epithelium during adult organ turnover

Paola Moreno-Roman<sup>1,†</sup>, Yu-Han Su<sup>1</sup>, Anthony Galenza<sup>1</sup>, Lehi Acosta-Alvarez<sup>1</sup>,  
Alain Debec<sup>2§</sup>, Antoine Guichet<sup>2</sup>, Jon-Michael Knapp<sup>3</sup>, Caroline Kizilyaprak<sup>4</sup>,  
Bruno M. Humbel<sup>4,5,‡</sup>, Irina Kolotuev<sup>4</sup>, & Lucy Erin O'Brien<sup>1\*</sup>

### **Affiliations:**

<sup>1</sup>Department of Molecular & Cellular Physiology, Stanford School of Medicine, Stanford, CA 94305 USA

<sup>2</sup>Equipe Polarité et Morphogénèse, Institut Jacques Monod, CNRS-Université de Paris, 75205 Paris CEDEX 13 – France

<sup>3</sup>Luminint Consulting Group, LLC.

<sup>4</sup>Universite de Lausanne, Bâtiment Biophore, Quartier Sorge, CH-1015 Lausanne, Switzerland

<sup>5</sup>Department of Cell Biology and Neuroscience, Juntendo University Graduate School of Medicine, Tokyo 113-8421, Japan

<sup>†</sup>Present address: Foldscope Instruments, Inc.

<sup>‡</sup>Present address: IMG, Okinawa Institute of Science and Technology, Tancha, Okinawa, Japan

<sup>§</sup>Present address: Institute of Ecology and Environmental Sciences, iEES, Sorbonne University, UPEC, CNRS, IRD, INRA, F-75005 Paris, France

**\*Corresponding author:** [lucye@stanford.edu](mailto:lucye@stanford.edu)

51  
52  
53

## 54 **ABSTRACT**

55       Barrier epithelial organs face the constant challenge of sealing the interior body from the  
56 external environment while simultaneously replacing the cells that contact this environment. These  
57 replacement cells—the progeny of basal stem cells—are born without apical, barrier-forming  
58 structures such as a protective, lumen-facing membrane and occluding junctions. How stem cell  
59 progeny acquire these structures to become part of the barrier is unknown. Here we use Focused Ion  
60 Beam-Scanning Electron Microscopy (FIB-SEM), Correlative Light-Electron Microscopy (CLEM),  
61 and volumetric imaging of live and fixed organs to investigate progenitor integration in the  
62 intestinal epithelium of adult *Drosophila*. We find that stem cell daughters gestate their future  
63 lumenal-apical membrane beneath a transient, basal niche formed by an umbrella-shaped occluding  
64 junction that shelters the growing cell and adheres it to mature neighbor cells. The umbrella junction  
65 both targets formation of a deep, microvilli-lined, apical invagination and closes it off from the  
66 contents of the gut lumen. When the growing cell is sufficiently mature, the umbrella junction  
67 retracts to expose this Pre-Assembled Apical Compartment (PAAC) to the gut lumen, thus  
68 incorporating the new cell into the intestinal barrier. When we block umbrella junctions, stem cell  
69 daughters grow and attempt to differentiate but fail to integrate; when we block cell growth, no  
70 umbrella junctions form and daughters arrest in early differentiation. Thus, stem cell progeny build  
71 new barrier structures in the shelter of a transient niche, where they are protected from lumenal  
72 insults until they are prepared to withstand them. By coordinating this dynamic junctional niche  
73 with progenitor cell differentiation, a physiologically active epithelial organ incorporates new cells  
74 while upholding integrity of its barrier.

75  
76

## 77 **INTRODUCTION**

78       Barrier epithelial organs protect the body interior from the external environment while  
79 performing physiological processes that require direct exposure to this environment. For example,  
80 the epithelium of the digestive tract both protects the body from gastric acid and enteric pathogens  
81 while simultaneously breaking down and absorbing ingested nutrients. The dual roles of barrier  
82 epithelia create a conundrum: Optimal physiological function requires that the tissue replace old,  
83 spent cells with new stem cell progeny, but each individual progeny must be incorporated into the  
84 epithelium without compromising barrier integrity (Guillot and Lecuit, 2013; Leblond, 1981; Liang et  
85 al., 2017; Macara et al., 2014; Pellettieri and Alvarado, 2007). The cellular mechanisms which enable  
86 stem cell progeny to seamlessly assimilate into a functioning barrier are poorly understood.

87 In all metazoans, epithelial barrier function arises from two conserved features of the epithe-  
88 lial cells themselves. First, cell-cell occluding junctions—tight junctions in vertebrates, septate  
89 junctions in invertebrates—create impermeable seals between cells (Varadarajan et al., 2019).  
90 Occluding junctions encircle each epithelial cell at the lateral border of the apical membrane,  
91 creating a sealed network that prevents even small molecules from freely passing between the  
92 lumen and the body interior. Second, a lumen-facing, apical plasma membrane, tightly folded into  
93 microvilli or cilia, forms a mucosal shield that resists corrosives, pathogens, and other luminal  
94 insults (Linden et al., 2008; McGuckin et al., 2011; Overeem et al., 2015). This apical membrane is a  
95 hallmark of epithelial differentiation and serves as the barrier’s direct interface with the outside  
96 world. In contrast, the stem cells that renew many barrier epithelia lack occluding junctions and a  
97 lumen-contacting apical membrane. Examples of such epithelia include the mammalian trachea  
98 (Evans and Moller, 1991; Michael J. Evans, 2001; Rock et al., 2009; Sekiya et al., 1988), mammary  
99 gland (Chepko and Dickson, 2003; Chepko and Smith, 1997), prostate (Tsujiyama et al., 2002), cornea  
100 (Cotsarelis et al., 1989), and olfactory lining (Leung et al., 2007), and the *Drosophila* adult midgut  
101 (Korzelius et al., 2014; Resnik-Docampo et al., 2017; Xu et al., 2019). Stem cells in these tissues are  
102 much smaller than their mature progeny; they inhabit the basal region of the epithelium, protected  
103 from luminal contents by the mature cells’ occluding junction network.

104 Since stem cells lack barrier-forming structures, their progeny must generate these structures  
105 *de novo* as they integrate into the barrier during terminal differentiation. Radial intercalation has  
106 been proposed to be this integration mechanism (Walck-Shannon and Hardin, 2014; Sedzinski et al.,  
107 2016; Chen et al., 2018). Many developing epithelial tissues use radial intercalation to merge basally  
108 derived cells into an overlying epithelium (Merzdorf et al., 1998; Deblandre et al., 1999; Stubbs et al.,  
109 2006; Voiculescu et al., 2007; McMahan et al., 2008; Campbell et al., 2010). In this process, a cell that  
110 is born basal to the occluding junction network integrates into this network by moving apically  
111 while wedging itself between pre-existing cells. When the tip of the intercalating cell reaches the  
112 epithelium’s occluding junctions, the new cell forms occluding junctions with its neighbors. These  
113 SJs begin as a pinpoint and morph into a ring that surrounds the cell’s nascent, lumen-facing apical  
114 membrane. This apical membrane and its encircling occluding junction expand radially as the cell  
115 grows to its final size (Stubbs et al., 2006; Sedzinski et al., 2016, 2017). Similar to these developmental  
116 contexts, integration of adult stem cell progeny involves basal-to-apical movement and *de novo*  
117 formation of barrier-forming structures. Whether stem cell progeny use radial intercalation or an  
118 alternate, perhaps novel, mechanism, remains unexamined.

119 We leveraged recent advances in Focused Ion Beam-Scanning Electron Microscopy (FIB-  
120 SEM), Correlative Light-Electron Microscopy (CLEM – (Burel et al., 2018)), and *in vivo* volumetric  
121 confocal live imaging (Martin et al., 2018) to directly examine this question using the midgut of  
122 adult *Drosophila*. Like many vertebrate barrier epithelia, the epithelial lining of the fly midgut is a  
123 leakproof, pseudostratified epithelium that is continually renewed through the divisions of basal  
124 stem cells (Lemaitre and Miguel-Aliaga, 2013). Investigating how new stem cell progeny assimilate

125 into this adult barrier epithelium, we found—unexpectedly—that assimilation occurs not by radial  
126 intercalation but by a striking morphogenetic process that has not previously been described for any  
127 tissue.

128 We discovered that as a stem cell daughter undergoes terminal differentiation, its nascent  
129 occluding junctions form a transient, umbrella-shaped niche that supports development of the cell's  
130 future, lumen-facing apical surface. This surface starts as an intercellular, localized delamination  
131 within the umbrella-shaped junction. The delaminated membrane of the differentiating cell  
132 accumulates apical markers, invaginates deeply into the cell's cytoplasm, and folds into microvilli in  
133 the shelter of the junctional niche; these behaviors create a pre-assembled apical compartment  
134 (PAAC) on the basal side of the epithelial barrier, protected from the contents of the gut lumen. In  
135 the final phase of cell differentiation, the umbrella junction retracts to fuse the PAAC with the gut  
136 lumen, and the apical membrane everts to form the mature cell's convex luminal surface.

137 The morphogenetic process of progenitor cell integration is coupled to growth that  
138 progenitor cells undergo as they terminally differentiate. When we block stem cell daughters from  
139 integrating, they become trapped in a hybrid, partially differentiated state and accumulate on the  
140 basal side of the epithelium. These animals die prematurely, implying that organismal longevity is  
141 compromised when the intestinal barrier is not properly replenished.

142 We suggest that PAAC-mediated integration enables stem cell progeny to generate lumen-  
143 facing cell surfaces in a space that is protected from luminal insults, thus enabling new cells to be  
144 added seamlessly to a physiologically active barrier epithelium.

## 145 RESULTS

146 Mature intestinal enterocytes form the bulk of the *Drosophila* midgut and are responsible for  
147 its barrier function. Like their vertebrate counterparts, *Drosophila* enterocytes are bonded together by  
148 apical occluding junctions (Figs. 1A & 2A). In the fly gut, these occluding junctions are smooth  
149 septate junctions (SJs) (Furuse and Izumi, 2017). Also like their vertebrate counterparts, *Drosophila*  
150 enterocytes display an apical brush border composed of long, dense microvilli (Fig. 2A); the brush  
151 border both absorbs nutrients and protects against luminal pathogens.

152 Enterocytes are terminally differentiated and post-mitotic. When shed through damage or  
153 death, they are replaced by division of resident stem cells (Micchelli and Perrimon, 2006; Ohlstein  
154 and Spradling, 2006; Jiang and Edgar, 2009; Liang et al., 2017). Stem cell progeny that are fated to  
155 become enterocytes must first pass through an intermediate, post-mitotic stage called an enteroblast  
156 (Ohlstein and Spradling, 2007; Bardin et al., 2010; Perdigoto et al., 2011) (Figure 1A). Enteroblast  
157 identity is determined by activation of the Notch receptor and can be visualized using Notch  
158 reporters such as *Su(H)-GFP::nls* and *Su(H)-lacZ* (Ohlstein and Spradling, 2007; Bardin et al., 2010;  
159 Perdigoto et al., 2011; de Navascués et al., 2012). As enteroblasts differentiate to enterocytes, they  
160 endoreplicate from 2N to 32-64N and increase in volume by ~30x (Xiang et al., 2017).

## 161 **Stem cell progeny initiate new SJs at discrete contact points with mature cells**

162 We were intrigued by prior observations that stem cells lack SJs (Korzelius et al., 2014;  
163 Resnik-Docampo et al., 2017; Xu et al., 2019) because this implies that differentiating cells must form  
164 SJs *de novo* and integrate themselves into the enterocytes' leakproof SJ network. We sought to  
165 determine when, where, and how *de novo* SJ formation occurs. First, we asked whether enteroblasts  
166 form SJs with their mature enterocyte neighbors (Figs. 1 & 2). If so, then SJ components should  
167 localize to enteroblast-enterocyte interfaces. To investigate this prediction, we used midguts that  
168 expressed markers to distinguish enteroblasts, enterocytes, and stem cells. We immunostained them  
169 for the SJ components Snakeskin (Ssk) and Tetraspanin2A (Tsp2A) (Yanagihashi et al., 2012; Izumi  
170 et al., 2016), then performed 5-channel multi-photon laser scanning microscopy to visualize SJs in  
171 the context of identified cells.

172 We observed SJ components at nearly all enteroblast-enterocyte interfaces, but not at the vast  
173 majority of stem cell-enterocyte interfaces nor at any stem cell-enteroblast interfaces. 89% of stem  
174 cells (*escargot**GAL4*, *UAS-his2b::CFP* (*esg*<sup>+</sup>), Armadillo (*Arm*<sup>+</sup>), *Su(H)-GFP:nls*<sup>-</sup>) exhibited no co-  
175 localization with SJ components (n=119 stem cells from 5 guts) (Fig. 1B & 1E), as expected (Korzelius  
176 et al., 2014; Resnik-Docampo et al., 2017; Xu et al., 2019). By contrast, 92% of enteroblasts (*esg*<sup>+</sup>, *Arm*<sup>+</sup>,  
177 *Su(H)-GFP:nls*<sup>+</sup>) (Figs. 1C, 1D, 1F & 1G) overlapped with enterocyte-enterocyte SJs (n=125  
178 enteroblasts from 5 guts). Many SJ-contacting enteroblasts exhibited small, presumably diploid,  
179 nuclei, which suggests that these contacts are formed in initial stages of enteroblast fate  
180 determination.

181 Enteroblast SJ staining invariably localized to the apical-most tips (apex) of the enteroblasts,  
182 where it overlapped with the basal terminus of the enterocyte SJs. This overlap might represent  
183 either *bona fide* adhesion septa between enteroblasts and enterocytes or else the mere physical  
184 proximity without formation of true adhesion septa. To distinguish these scenarios, we performed  
185 correlative light-electron microscopy (CLEM) (Kolotuev, 2014) on *Su(H)-GFP::nls*-expressing  
186 midguts to identify the GFP-labelled enteroblasts. FIB was performed in random positions of the  
187 midgut R4c region; GFP-labeled enteroblasts were identified; and interfaces between these  
188 enteroblasts and neighbor enterocytes were examined for potential SJ septa.

189 In EM, SJ septa characteristically appear as electron-dense structures that 'fuse' together the  
190 apposing plasma membranes of adjacent cells. As expected, enterocyte-enterocyte septa fused  
191 together the apical-most regions of the cells' lateral membranes, directly adjacent to their microvilli-  
192 rich brush borders (Fig. 2A). However, when enterocytes were next to an enteroblast (Figs. 2B-2E),  
193 their SJs extended basally toward the enteroblast (red pseudocolor in Fig. 2B'') and fused with  
194 enteroblast plasma membrane at its apex (arrowheads). These observations demonstrate that  
195 enteroblasts form *bona fide* SJ septa with mature neighbor cells. In addition, they imply that light-  
196 microscopy visualized overlap of immunostained SJ components with enteroblast cell membranes  
197 (Fig. 1) are sites of new SJ formation.

198 To understand the three-dimensional structure of enteroblast-enterocyte SJs, we performed  
199 array tomography. We transformed the tomograms into volumetric renderings of individual cells  
200 and their SJ interfaces. Fig. 2C and Video 1 show the volumetric rendering of a 30-slice series  
201 surrounding the CLEM image in Fig. 2B. The apex of this diploid (presumably, newly determined)  
202 enteroblast (red) exhibits three finger-like projections (arrowheads), each of which forms a point-  
203 like, discrete SJ (green) with one of its three neighbor enterocytes (blue; labelled 1-3 in Fig. 2B). No  
204 SJs are visible between the enteroblast and an adjacent, Su(H)-GFP:nls-negative stem cell (yellow).  
205 The enteroblast's three point-like SJs contact the three enterocyte SJs (pink, pale blue, and purple) at  
206 the latter's basal rim. Importantly, we found no discontinuities between the new, enteroblast-  
207 enterocyte SJs (overlap between green and either pink, pale blue, or purple) and the pre-existing,  
208 enterocyte-enterocyte SJs (overlap between pink and pale blue, pink and purple, or pale blue and  
209 purple). This structural continuity suggests that the pre-existing, enterocyte-enterocyte SJ guides the  
210 localization of initial SJ contacts between enterocytes and the new enteroblast.

### 211 **SJ contacts develop into a large, umbrella-shaped SJ that covers the enteroblast apex and** 212 **extends toward the basal epithelium**

213 We next generated a volumetric rendering of a larger (hence, likely older) enteroblast (red)  
214 from a 413-slice FIB-SEM tomographic series that spanned a  $35.6\mu\text{m} \times 35.6\mu\text{m} \times 4.5\mu\text{m}$  tissue  
215 volume. A single slice from this series is shown in Figs. 2D-D'' and Fig. S1, and the volumetric  
216 rendering is shown in Figure 2E and Video 2. In contrast to the nascent SJ contacts formed by a  
217 young enteroblast (Figures 2B & 2C), the SJ (green) of this older enteroblast is an expansive,  
218 adhesive 'zone' whose shape resembles an umbrella. This umbrella SJ fuses the pyramidal  
219 enteroblast to three mature neighbor cells: the SJs (pink and purple) of two enterocytes (blue;  
220 labelled 1 and 2 in Figs. 2D & 2E) and those of an enteroendocrine cell (pale blue; labelled 3 in Fig.  
221 2D). No SJs are visible at the interface between the enteroblast and a presumptive stem cell (yellow).  
222 As with SJs of the young enteroblast (Fig. 2B-C), the SJs between the older enteroblast and its  
223 neighbor enterocytes (green/pink overlap and green/purple overlap) are continuous with the SJ  
224 that had previously formed between the enterocytes themselves (pink/purple overlap).

225 Importantly, the umbrella SJ extends unusually far toward the basal epithelium—a feature  
226 that is incompatible with a simple model of radial intercalation. SJs typically occupy a narrow band  
227 at the apical border of the enterocytes' lateral membranes (Fig. 2A; also in Fig. 2E and E', the purple  
228 SJ on left side of enterocyte 1 and pink SJ on right side of enterocyte 2). In radial intercalation, the SJ  
229 initiates at the point where the new cell's apical tip becomes co-planar with the organ's mature SJ  
230 network; hence, the new SJ grows to a narrow width that matches that of mature SJs (Walck-  
231 Shannon and Hardin, 2014; Stubbs et al., 2006; Sedzinski et al., 2016, 2017; Chen et al., 2018).  
232 However, an enteroblast's umbrella SJ spreads basally along two-thirds of the enterocytes' lateral  
233 membranes and shrouds the top third of the enteroblast (Fig. 2E, green SJ and associated pink and

234 purple SJs; Video 2). This basally-extended umbrella shape implies an alternate mode of integration  
235 in which the new SJ forms basal to the organ's mature SJ network.

### 236 **Cloning Meduse, an actin-associated protein that localizes to the brush border of midgut** 237 **enterocytes**

238 The second component of the gut's barrier structure is collectively formed by the apical cell  
239 surfaces that line the gut lumen. Mature enterocytes fold these surfaces into long, dense microvilli,  
240 forming the intestinal brush border (Fig. 2A). Mature enterocytes also exhibit apical-basal polarity,  
241 as characterized by lumen-polarized localization of cytoskeleton-associated proteins such as Moesin,  
242 Karst ( $\beta_H$ -spectrin), and Myosin7a (Baumann, 2001; Chen et al., 2018).

243 Another lumenally polarized marker is provided by the splice-trap transposon line  
244 A142(Bobinnec et al., 2003; Buchon et al., 2013), which expresses a GFP fusion protein that co-  
245 localizes with Moesin at or near enterocyte microvilli (Fig. 3A-C). We found that this transposon is  
246 inserted into CG2556 (Fig. S2A), a previously uncharacterized gene that does not appear to have  
247 vertebrate homologs. Since the filamentous appearance of the A142 fusion protein in egg chambers  
248 is reminiscent of sea jelly tentacles (Fig. S2B), we named this gene Meduse (Mdu). Mdu is predicted  
249 to be a 470 amino-acid, 51 kDa protein whose sole identifiable motif is an actin binding domain. This  
250 putative actin-binding function is consistent with localization of the A142 splice trap to the apical  
251 brush border of enterocytes and with actin filaments in Stage 10 egg chambers, the latter of which is  
252 latrunculin-sensitive (Fig. S2B-C).

### 253 **The umbrella SJ is a transient niche for formation of the new cell's future lumenal-apical** 254 **surface**

255 During development of tubular epithelial organs, cells generally couple the formation of a  
256 lumen-contacting cell surface to the formation of apical features including microvilli, occluding  
257 junctions, and apically polarized membrane and cytoskeletal proteins (Blasky et al., 2015; Datta et  
258 al., 2011; O'Brien et al., 2002; Sigurbjörnsdóttir et al., 2014). By comparison, stem cells in the adult fly  
259 gut lack this entire suite of lumenal-apical features (Figs. 2B-2E) (Chen et al., 2018). How do stem cell  
260 progeny generate a lumenal-apical surface as they differentiate, and how do they coordinate apical  
261 morphogenesis with SJ formation and epithelial integration?

262 To address this question, we used high-resolution images of fixed guts to identify cells at  
263 distinct stages of differentiation, assessed the localization of apical markers, and correlated apical  
264 marker localization to SJ maturation (Figs. 3 & S2 and Video 3). Midguts that express Su(H)-lacZ  
265 were used because the long perdurance of  $\beta$ -galactosidase (>20 h half-life (Bachmair et al., 1986))  
266 makes it possible to identify early-stage enterocytes that have recently turned off enteroblast-specific  
267 *Su(H)* activity but have not yet completed terminal morphogenesis (Fig. S3). Comparing apical

268 marker localization, SJ morphology, and the cytoplasmic and nuclear sizes of Su(H)-lacZ<sup>+</sup> cells, we  
269 distinguished four stages of apical membrane morphogenesis.

270 In Stage 1 (left-most column in Fig. 3), enteroblasts are small, and their nuclei appear diploid;  
271 this stem-like appearance is consistent with the cells being in early stages of terminal differentiation.  
272 Stage 1 enteroblasts lack apical polarity, but they have formed SJ contacts with enterocytes. The few  
273 apical markers that are expressed, such as Moesin (Figs. 3A and C), do not show a polarized  
274 distribution; other apical markers, such as Karst and Mdu (Figs. 3B and 3C), are not detectable. The  
275 apex of Stage 1 enteroblasts contacts the basal terminus of enterocyte-enterocyte SJs, as revealed by  
276 localization of SJ components Tsp2A and Ssk (Figs. 3A and 3C). We interpret these SJ contacts to be  
277 nascent, point-like SJs, similar to those formed by the enteroblast in Figs. 2B and 2C.

278 In Stage 2 (Fig 3, second column from left), enteroblasts preferentially localize apical markers  
279 to their apex; this enrichment forms a bright plaque that is covered by broadened SJ contacts (Figs.  
280 3A-C). We suggest that this apical plaque represents early stages of polarization since low levels of  
281 apical markers persist at other cortical regions. The enteroblast SJ grows to cover the cell's entire  
282 apex; we infer that these Stage 2 SJs are similar to the SJ in Figs. 2D and 2E. With respect to  
283 morphology, some Stage 2 enteroblasts (e.g. Figs. 3B and 3C) are similar in cytoplasmic and nuclear  
284 size to Stage 1 enteroblasts; other Stage 2 enteroblasts are slightly larger, and their nuclei appear  
285 intermediate in ploidy between 2N stem cells and 32-64N, mature enterocytes (e.g. Fig. 3A).

286 In Stage 3 (Fig. 3, third column from left), the differentiating cells resemble immature  
287 enterocytes. Their cytoplasmic and nuclear volumes are larger than Stage 1-2 enteroblasts, yet  
288 smaller than mature enterocytes, and their low levels of  $\beta$ -galactosidase suggest that Su(H) enhancer  
289 activity was diminishing. We refer to these cells as pre-enterocytes. Apical markers—now highly  
290 expressed—localize to a conspicuous, concave structure that is covered by the broad, umbrella-  
291 shaped SJ sheet that we described above. These concave structures are the morphological hallmarks  
292 of Stage 3. With diameters up to 12  $\mu$ m—roughly the diameter of a mature enterocyte—they often  
293 fill the apex of the pre-enterocytes. We were surprised to discover that they are topologically  
294 discontinuous with the midgut lumen (Video 3), another feature that is incompatible with radial  
295 intercalation. Instead, we conjecture that these structures are precursors of the pre-enterocytes'  
296 future lumen-contacting surface. Hence, we designate them as Pre-Assembled Apical  
297 Compartments (PAACs).

298 In Stage 4, (Fig. 3, right column), pre-enterocytes finish integrating into the gut epithelium by  
299 acquiring a topology of cell-cell interfaces that is equivalent to mature enterocytes. Stage 4 cells are  
300 circumscribed (rather than covered as in previous stages) by SJs, and they now possess a lumen-  
301 contacting apical surface. The shapes of Stage 4 lumen-contacting surfaces and Stage 3 PAACs are  
302 highly similar, which suggests that the PAAC opens up to the gut lumen via remodeling of its  
303 overlying umbrella SJ into a ring. Stage 4 cells are smaller in cytoplasmic volume and nuclear size  
304 compared to mature enterocytes. In a final Stage 5 (Fig. S3D), the cell acquires its mature size and



305 ploidy and everts its luminal-apical surface to form a convex shape, thus completing terminal  
306 differentiation.

307 Altogether, this morphogenetic sequence reveals that midgut stem cell progeny do not form  
308 new SJs and an apical membrane via radial intercalation into the epithelial barrier. Rather, they form  
309 these barrier structures while still in the basal epithelium, protected by the mature barrier.

### 310 **Live imaging of enteroblast-enterocyte integration**

311 We next asked whether live imaging corroborates the four-stage sequence (Fig. S3D) of  
312 enteroblast-enterocyte integration implied by fixed samples. To address this question, We  
313 performed continuous time-lapse imaging using Windowmount methodology, in which volumetric  
314 movies of physiologically functioning guts are captured in live animals through a window cut into  
315 the dorsal cuticle (Fig. 4A) (Martin et al., 2018). Prior analyses of stem cell clones in both fixed guts  
316 (He et al., 2019; de Navascués et al., 2012) and intravital live imaging (Koyama et al., 2020) suggest  
317 that most enteroblasts require >24 h to differentiate into enterocytes. Although this time frame is  
318 longer than the 16-20 h viability of animals during Windowmount (Martin et al., 2018), longitudinal  
319 imaging suggests that some cells differentiate in <24 h (Koyama et al., 2020). Therefore, we aspired  
320 to capture these faster cells.

321 We first examined live dynamics of SJs. From nine movies of *GS5966>tsp2A::GFP; Su(H)-*  
322 *mCherry* midguts with durations from 7.25-20 h, we identified one movie in which an mCherry-  
323 expressing cell increased in cross-sectional area by nearly three-fold (Fig. 4B & 4D, and Video 4); this  
324 dramatic growth is an identifying feature of enteroblast-enterocyte differentiation. To determine  
325 whether the Tsp2A::GFP-labelled SJ associated with this cell exhibited dynamics consistent with the  
326 mechanism implied by Fig. 3, we analyzed an orthogonal view through the cell's apical-basal axis  
327 (Fig. 4C). In the movie's initial 105 min, the SJ that contacted the differentiating cell grew broader  
328 and ultimately covered the cell's entire apex (Fig. 4C, arrow in 0- and 90-min panels; Video 4, 0-105  
329 min). This broadening is consistent with the notion that SJs expand from discrete contact points in  
330 Stage 1 (Fig. 2C, Fig. 3A & 3B, and Video 1) to an umbrella shape in Stages 2 and 3 (Fig. 2E, Video 2,  
331 Fig. 3A & B, Fig. 5D, and Video 6). Between 120-285 min, a hollow space developed along the SJ's  
332 apical-basal axis; simultaneously, the SJ extended along the lateral faces of the now-larger cell (Fig.  
333 4C, arrows (SJ) and asterisks (hollowing) in 195- and 285-min panels; Video 4, 120-285 min). This  
334 hollowing and lateral extension are consistent with remodeling of the SJ from an overlying sheet in  
335 Stage 3 to a circumscribing ring in Stage 4 (Fig. 3A & 3B). Overall, these live SJ dynamics support the  
336 morphogenetic sequence suggested by the fixed analyses in Fig. 3.

337 We next examined live dynamics of the apical membrane using midguts that expressed the  
338 apical marker Moesin::GFP and the nuclear marker His2av::mRFP (Fig. 4E and Video 5). The  
339 Moesin::GFP-labelled luminal-apical membranes appeared as a convoluted surface atop the gut  
340 cells' nuclei because the apical surface of mature enterocyte is domed (e.g. Fig. 2A). Basal to the

341 lumenal-apical membranes, we frequently observed GFP-labelled structures that were fainter in  
342 intensity and concave in shape. We conjecture that these structures are PAACs. While most PAACs  
343 did not dramatically change in shape or size during imaging, some PAACs became brighter and  
344 deeper over time (*e.g.*, Fig. 4E and Video 5). This evolution is consistent with Stages 3-4 of  
345 differentiation, during which PAACs initially form and subsequently become larger and more  
346 enriched for apical markers (Fig. 3, Stages 2-3). Overall, we conclude that live imaging of SJ and  
347 apical membrane dynamics provides additional support for the four-stage mechanism suggested by  
348 fixed tissues.

### 349 **PAACs are intercellular lumens formed by asymmetric pre-enterocyte apical membranes** 350 **and enterocyte basolateral membranes**

351 Our finding that PAACs are physically distinct from the gut's lumenal-apical surface raises  
352 basic questions about the nature of these structures: Are they intracellular or intercellular? What is  
353 their relationship to the developing SJ? Does their apical polarity correspond to a mature brush  
354 border? To gain insight into these and other questions, we examined the PAACs' ultrastructure in  
355 FIB-SEM tomographic series.

356 To identify putative PAACs, we first identified pre-enterocytes by looking for polyploid cells  
357 that lacked a visible lumenal-apical surface. We noticed that the apexes of such pre-enterocytes  
358 frequently contained membrane-bound, ellipsoid ultrastructures (Fig. 5A–cyan box, and Fig. 5B)  
359 whose shape and cellular position resembled PAACs. These structures enclosed prominent lumens  
360 that are distinct from the gut lumen, circumscribed by SJs, and lined with microvilli. The microvilli  
361 are densely arrayed, similar to brush border microvilli, but they are shorter, which suggests they are  
362 immature. Notably, Moesin, which outlines PAACs in confocal micrographs (Fig. 3 and Video 3), is  
363 a marker of microvilli in other *Drosophila* epithelia (Edwards et al., 1997; Lattner et al., 2019). We  
364 also found sausage-shaped (allantoid) ultrastructures that, like the ellipsoids, are lined with dense  
365 microvilli and circumscribed by SJs (Fig. 5A–magenta box, and Fig. 5C). The allantoids' lumens are  
366 extremely slender, suggesting that they may be newly formed. Given these features, we conjecture  
367 that the ellipsoid ultrastructures are PAACs and the allantoid ultrastructures are their precursors.

368 We took advantage of our FIB-SEM series to investigate whether PAACs are intracellular  
369 compartments that develop within a pre-enterocyte, akin to the large apical endosomes (vacuolar  
370 apical compartments/apicosomes) observed in mammalian cells (Gilbert and Rodriguez-Boulan,  
371 1991; Taniguchi et al., 2017; Vega-Salas, 1988) or intercellular compartments that develop between a  
372 pre-enterocyte and its mature enterocyte neighbors. We selected series that captured the near-  
373 complete volume of individual PAACs or PAAC precursors, and we analyzed their membrane  
374 topologies slice-by-slice (Figs. 5B and 5C). We also generated a volumetric rendering of a 200-slice  
375 FIB-SEM tomographic series that contained a PAAC, a PAAC precursor, and their associated pre-  
376 enterocyte within a tissue volume of  $40.2\ \mu\text{m} \times 23.9\ \mu\text{m} \times 8\ \mu\text{m}$  (Fig. 5D and Video 6).

377 These analyses invariably uncovered a region in which pre-enterocyte and mature enterocyte  
378 membranes separate from each other to form the PAAC's luminal space (Fig. 5B and Video 6). Thus,  
379 PAACs are intercellular. The PAAC lumen is surrounded by an expansive SJ that adheres the pre-  
380 enterocyte to mature enterocytes; this SJ separates the PAAC from the gut's central lumen. The  
381 ultrastructure of the PAAC-associated SJ is consistent with the SJs we observed in immunostained,  
382 Stage 3 pre-enterocytes (Fig. 3 and Video 3). PAAC precursors—even very small ones—also  
383 comprise an intercellular lumen surrounded by an expansive SJ. We did not observe any microvilli-  
384 lined compartments that were entirely intracellular. The similar topology of PAACs and PAAC  
385 precursors suggests that PAACs initiate via de-adhesion of apposing plasma membranes rather than  
386 fusion of an intracellular compartment with the SJ.

### 387 **PAACs' split apical/basolateral polarity is unique for a lumen-encompassing structure**

388 PAAC-forming pre- and mature enterocytes make markedly unequal contributions to the  
389 PAAC's overall morphology. The pre-enterocyte plasma membrane represents the vast majority of a  
390 PAAC's total surface area. It folds inward at nearly 180 degrees (arrow in Fig. 5B) to create a deep  
391 invagination into the pre-enterocyte cytoplasm. This invagination accounts for most of the PAAC's  
392 luminal volume and evokes a scenario in which PAAC development is driven by inward folding of  
393 the pre-enterocyte plasma membrane. In contrast to the structured folds of the pre-enterocyte  
394 membrane, the mature enterocyte membranes are amorphous and rest like a blobby lid atop the  
395 PAAC lumen (Fig. 5B). These differences are even more extreme in PAAC precursors (Fig. 5C).

396 The contrast between the structured pre-enterocyte membrane and the amorphous  
397 enterocyte membrane corresponds to a second—unprecedented—asymmetry of PAACs: their  
398 luminal polarity is split. The PAAC's pre-enterocyte membrane is apical while the partner  
399 enterocyte membrane(s), which lacks apical markers (Video 3) and microvilli (Figs. 5B & 5C, and  
400 Video 6), is by default basolateral. To our knowledge, this combination has not previously been  
401 reported for any epithelial lumen either in cell culture or *in vivo*. Rather, epithelial lumens to date  
402 have been either uniformly apical (Blasky et al., 2015; Datta et al., 2011; O'Brien et al., 2002), or, in  
403 some rare, experimentally induced cases, uniformly basolateral (Lowery et al., 2009; Wang et al.,  
404 1990). However, these prior studies examined lumens that form between cells at similar  
405 differentiation states; we conjecture that the PAACs' unique asymmetries derive from their origin  
406 between cells at distinct differentiation states.

### 407 **Enteroblasts must form SJs to integrate and mature into enterocytes**

408 Our data reveal that as stem cell daughters differentiate, they initiate epithelial integration  
409 by forming new, sheet-like SJs with mature neighbor cells. What happens when SJ formation is  
410 blocked? To examine this question, we generated "SJ-less" enteroblasts and assessed their ability to  
411 integrate and differentiate. We inhibited expression of the SJ component *ssk* specifically in  
412 enteroblasts by using the enteroblast driver *Su(H)-GAL4* to express a *UAS-sskRNAi* transgene under

413 control of temperature-sensitive *GAL80<sup>ts</sup>* (McGuire et al., 2003) (genotype henceforth referred to as  
414 *Su(H)<sup>ts</sup>>sskRNAi*). A *UAS-GFP* transgene was also included to identify the RNAi-expressing cells.  
415 The *sskRNAi* hairpin was expressed from days 0-4 of adult life, after which midguts were harvested  
416 and analyzed. To confirm that *sskRNAi* prevented SJ formation, we performed immunostaining for  
417 another SJ component, Coracle. Whereas Coracle localized to the apex of *Su(H)<sup>ts</sup>*-expressing control  
418 cells, it localized to the cytoplasm of *Su(H)<sup>ts</sup>>sskRNAi* cells (Figs. 6A & 6B). This redistribution  
419 implies that *sskRNAi* expression prevents proper formation of SJs.

420 *Su(H)<sup>ts</sup>>sskRNAi* cells categorically failed to integrate into the gut epithelium. Instead of  
421 reaching the gut's central lumen, these cells accumulated beneath the gut's SJ network (Figs. 6A &  
422 6B). Although this basal localization is typical of enteroblasts, *Su(H)<sup>ts</sup>>sskRNAi* cells did not arrest in  
423 an enteroblast state. Rather, they grew in volume and endoreplicated their nuclei (Fig. 6C and Figs.  
424 S5A & S5B), two behaviors characteristic of pre-enterocytes (Fig. 3, Stages 3 & 4). Yet unlike pre-  
425 enterocytes, *Su(H)<sup>ts</sup>>sskRNAi* cells did not adopt a cuboidal or columnar shape and instead became  
426 blob-shaped. Similar behaviors were exhibited by MARCM-generated stem cell clones (Lee and Luo,  
427 1999) that were genetically null for SJ components *tsp2A* (Chen et al., 2018) and *mesh* (Fig. S5E &  
428 S5F). Thus even as SJ-less cells achieve mature size, they do not become part of the epithelium.

429 The indeterminate morphology of *Su(H)<sup>ts</sup>>sskRNAi* cells was accompanied by inappropriate,  
430 mixed expression of fate-specific transcription factors. Whereas the stem cell/enteroblast  
431 transcription factor Sox100B (Doupé et al., 2018; Jin et al., 2020; Meng et al., 2020) was expressed by  
432 both control *Su(H)* and *Su(H)<sup>ts</sup>>sskRNAi* cells (Figs. S5A & S5B), the enterocyte transcription factor  
433 Pdm1 (Dantoft et al., 2013; Korzelius et al., 2014; Lee et al., 2009) was absent from control *Su(H)* cells  
434 yet expressed in *Su(H)<sup>ts</sup>>sskRNAi* cells (Figs. S5C & S5D). Similar, mixed patterns of marker expres-  
435 sion were observed by Xu and colleagues upon enteroblast-specific depletion of the SJ component  
436 *tsp2A* (Xu et al., 2019).

437 Altogether, these findings imply that SJ-less cells become trapped in an abnormal, hybrid  
438 cellular state in which the distinct features of enteroblasts and enterocytes co-exist abnormally.

### 439 **Cell growth is required for integration, independent of SJs**

440 Having found that growth is not sufficient for cells to integrate, we asked whether  
441 integration requires cell growth. Cell growth during the enteroblast-enterocyte transition is  
442 controlled by the Tsc/Rheb/Tor pathway (Amcheslavsky et al., 2011; Kapuria et al., 2012; Nie et al.,  
443 2015; Quan et al., 2013; Xiang et al., 2017). Tor pathway activation in enteroblasts can be visualized  
444 by immunostaining for the phosphorylated isoform of the Tor kinase substrate eIF4E Binding Pro-  
445 tein (phospho-4EBP) (Kapuria et al., 2012). When Tor is inactivated via overexpression of its  
446 inhibitor, Tsc1/2, 4EBP is not phosphorylated (Fig. 6F) and differentiation-associated growth is  
447 blocked (Kapuria et al., 2012).

448 We found that growth of SJ-less cells, like growth of normal enteroblasts, depends on Tor.  
449 Phospho-4EBP immunostaining showed that  $Su(H)^{ts}>sskRNAi$  cells are Tor-activated, akin to  $Su(H)$   
450 control cells (Figs. 6D & 6E). When we conditionally overexpressed  $tsc1/2$  in either control cells  
451 ( $Su(H)^{ts}>tsc1/2$ ) or  $ssk$  knockdown cells ( $Su(H)^{ts}>sskRNAi, tsc1/2$ ), we abrogated phospho-4EBP and  
452 inhibited cell growth (Figs. 6F & 6G).

453 We next examined whether Tor inactivation and consequent growth inhibition affects the  
454 ability of cells to integrate. We assessed SJ formation in  $Su(H)^{ts}>tsc1/2$  cells by immunostaining guts  
455 for Ssk and the  $Su(H)$ - $lacZ$  reporter and determining whether the Ssk signal contacted the apex of  
456  $\beta$ -galactosidase-labelled cells. Whereas 92% of control  $Su(H)$  cells formed SJs, only 53% of  
457  $Su(H)^{ts}>tsc1/2$  cells did (Fig. 6H). Revealingly, no  $Su(H)^{ts}>tsc1/2$  cells progressed beyond Stage 1 (Fig.  
458 6I). Thus, SJ initiation is not sufficient for integration to progress; enteroblast growth is also  
459 necessary. While the precise contribution of growth is currently unclear, it may fuel expansion of the  
460 umbrella SJ or to initiate PAAC formation.

## 461 **Organ-scale impacts of blocked cellular integration**

462 Organ renewal requires that new cells integrate successfully into the epithelium. When cell  
463 integration is blocked, what are consequences to organ-scale cellular equilibrium? We first asked  
464 whether blocking integration causes undifferentiated cells to accumulate abnormally in the tissue  
465 (Fig. 7A). When animals are maintained under stable, *ad libitum* conditions,  $Su(H)^+$  cells typically  
466 comprise ~10% of total cells in the midgut R4 region (Bonfini et al., 2021; O'Brien et al., 2011;  
467 Viitanen et al., 2021). This proportion essentially doubled when we blocked integration by inhibiting  
468 new SJ formation ( $19.1\% \pm 5.5\%$  of total cells in  $Su(H)^{ts}>sskRNAi$  guts;  $9.3\% \pm 2.8\%$  in control guts).  
469 By comparison, the proportion of  $Su(H)^+$  cells remained nearly normal when we blocked integration  
470 by inhibiting cell growth ( $12.0 \pm 2.8\%$  in  $Su(H)^{ts}>tsc1/2$  guts). Concomitant inhibition of both SJ  
471 formation and cell growth resembled growth inhibition alone ( $12.0 \pm 3.2\%$  of total cells in  
472  $Su(H)^{ts}>sskRNAi, tsc1/2$  guts were  $Su(H)$ - $lacZ^+$ ). Thus, whether integration-blocked cells accumulate  
473 in the tissue depends on the means through which integration was blocked. One possible reason  
474 may be differences in differentiation state of the integration-blocked cells. Early-stage enteroblasts,  
475 which still adhere strongly to their mother stem cell, can repress subsequent mother cell divisions  
476 (Choi et al., 2011), and  $Tsc1/2$  overexpression—but not SJ inhibition—arrests differentiation at an  
477 early stage ((Kapuria et al., 2012) and Figs. 6C & S5C-G). This early-stage arrest may enable growth-  
478 inhibited cells to repress production of additional daughter cells.

479 We next examined whether blocking integration alters the organ's total number of cells (Fig  
480 7B). Comprehensive counts of DAPI-labeled nuclei in the midgut R4ab region revealed that total cell  
481 number remains normal when new cells cannot integrate, even for guts in which integration-  
482 blocked cells accumulate abnormally ( $1997 \pm 489$  cells in control  $Su(H)^{ts}$  guts compared  $1960 \pm 398$ ,  
483  $2067 \pm 210$  cells, and  $1611 \pm 299$  cells in  $Su(H)^{ts}>sskRNAi, Su(H)^{ts}>tsc1/2$ , and  $Su(H)^{ts}>sskRNAi, tsc1/2$

484 guts, respectively). We speculate that feedback mechanisms inherent to organ-scale control of total  
485 cell number (Akagi et al., 2018; Jin et al., 2017; Liang et al., 2017) ‘sense’ unintegrated cells and exert  
486 a compensatory effect on cellular equilibrium.

## 487 **DISCUSSION**

488 Epithelial organs maintain a leakproof barrier between the interior body and the external  
489 environment even while continuously replacing the cells that directly contact this environment. In  
490 many barrier epithelia, these replacement cells derive from basal stem cells and are born without a  
491 lumenal-apical surface or occluding junctions, two structures that are essential for barrier integrity.  
492 Consequently, daughters must generate these structures *de novo* and integrate into the barrier as  
493 they differentiate.

494 We examined this process at ultra-fine spatial resolution during physiological turnover of  
495 the *Drosophila* intestinal epithelium. Our analyses led to a previously undescribed mechanism that  
496 we term PAAC-mediated integration (Fig. 7C): The new cell forms a broad, umbrella-shaped SJ that  
497 serves as a transient niche for biogenesis of the cell’s future lumenal-apical surface (the PAAC).  
498 When the new cell is sufficiently mature, the umbrella SJ retracts and the PAAC lumen fuses with  
499 the gut lumen, exposing the cell’s apical membrane to the external environment. In contrast to a  
500 prior model of radial intercalation (Fig. 7C), PAAC-mediated integration enables stem cell daughters  
501 to form barrier structures in a space sheltered from the contents of the gut lumen—a potentially  
502 crucial safeguard for an epithelium that is simultaneously physiologically active and continuously  
503 renewing.

## 504 **PAAC architecture: Implications for epithelial lumen formation**

505 Lumens are defining features of epithelial tubes, and the molecular and cellular events that  
506 drive lumen formation are a topic of intense interest. Our current understanding of lumen formation  
507 comes from studying epithelial cells that are at similar states of differentiation (Blasky et al., 2015;  
508 Datta et al., 2011; Overeem et al., 2015; Sigurbjörnsdóttir et al., 2014). PAACs provide a first, fine-  
509 grained example of how lumens form between cells that are at disparate states of differentiation.  
510 This fate difference likely underlies the PAACs’ two distinctive characteristics, structural asymmetry  
511 and split polarity. Below, we speculate how these PAAC-specific characteristics may shed new light  
512 on lumen-forming mechanisms in general.

513 PAACs are, to the extent we can determine, the first type of intercellular lumen that exhibits  
514 split polarity—the membranes that form PAACs alternate between apical identity (the pre-  
515 enterocyte) and basolateral identity (mature enterocytes) (Figs. 3, 5 & 7C; and Video 6). By  
516 comparison, all epithelial lumens of which we are aware are normally enclosed by membranes that  
517 are exclusively apical (Blasky et al., 2015; Datta et al., 2011; Overeem et al., 2015; Sigurbjörnsdóttir et  
518 al., 2014). Our finding that PAACs’ mature enterocyte membranes do not form a secondary apical

519 domain is surprising because cells that contact multiple lumens in developing epithelia form a  
520 corresponding apical domain for each lumen (Alvers et al., 2014; Bagnat et al., 2007; Bryant et al.,  
521 2010). One possible explanation is that terminally differentiated epithelial cells actively repress  
522 secondary apical domains whereas epithelial cells in developmental contexts do not. Another, non-  
523 exclusive, possibility is that all lumens transiently exhibit split apical/basal polarity at their earliest  
524 stage—one lumen-forming cell initiates an apical domain prior to the others—but that this stage is,  
525 in most cases, extremely short-lived, so it has not been detected previously.

526 PAACs' second striking feature is their extreme structural asymmetry: pre- and mature  
527 enterocyte membranes, despite being bonded at their edges by the same SJ, acquire shapes that are  
528 extreme opposites. The pre-enterocyte PAAC membrane, which grows dramatically and invaginates  
529 deeply into the cytoplasm of the differentiating cell, convolutes into sharp folds and broad curves.  
530 This structure, which is superimposed onto the membrane's fine-scale microvillar folds, sets the  
531 volume of the PAAC. The mature enterocyte membranes, by contrast, appear largely passive. They  
532 sit like a lid atop the neck of the pre-enterocyte invagination and do not appear to morph or expand  
533 during differentiation (*e.g.*, compare the nascent and advanced PAACs in Fig. 5 and Video 6).

534 These two features, split apical/basolateral polarity and structural asymmetry, provide  
535 insight into opposing models of lumen formation. The structural asymmetry of PAACs is  
536 incompatible with the prevailing model of lumen formation, in which hydrostatic pressure drives  
537 lumen growth (Chan et al., 2019; Dasgupta et al., 2018; Dumortier et al., 2019; Ruiz-Herrero et al.,  
538 2017; Yang et al., 2021), because lumens generated by hydrostatic pressure are uniformly convex  
539 (Vasquez et al., 2021). Rather, this asymmetry evokes a recently proposed alternative mechanism in  
540 which expansion of apical membrane surface drives lumen growth in a pressure-independent  
541 manner (Vasquez et al., 2021). Indeed, since growth of the PAAC lumen is accounted for by apical  
542 surface expansion of a single cell, PAACs may provide an informative case study of apical surface-  
543 driven growth. Identifying the molecular signals that target and stabilize new PAACs will aid in  
544 exploring these scenarios.

## 545 **A trade-off between barrier integrity and junction-forming efficiency**

546 In both PAAC-mediated integration and radial intercalation, single cells assimilate into an  
547 epithelium through basal-to-apical movement. Why do distinct mechanisms exist to reach the same  
548 cellular endpoint? We speculate that, in general, basal-to-apical assimilation requires a trade-off  
549 between integration speed and barrier integrity. A given mechanism may favor one of these  
550 qualities at the expense of the other. In principle, a spectrum of mechanisms enables tissues to  
551 employ the mechanism that is best suited to their specific biological context.

552 In this schema, radial intercalation is rapid and parsimonious. It occurs over time scales of  
553 minutes or a few hours. New junctions initiate within the pre-existing junctional network and  
554 expand directly into their final morphology, an apico-lateral band. Intriguingly, all examples of

555 radial intercalation described in the literature take place in developing epithelia (Merzdorf et al.,  
556 1998; Deblandre et al., 1999; Stubbs et al., 2006; Voiculescu et al., 2007; McMahon et al., 2008;  
557 Campbell et al., 2010). Because embryos themselves are housed in a protective environment (such as  
558 an egg or a womb), cells in embryonic tissues can display immature junctions and incipient  
559 microvilli at the organ's apical surface without risking exposure to the external environment.

560 PAAC-mediated integration is slower and, since it involves building and then retracting a  
561 temporary scaffold, likely less efficient. We estimate that typical time frames for PAAC-mediated  
562 integration are >24 h, based on changes in nuclear size of stem cell daughters over time (Koyama et  
563 al., 2020). (Indeed, this >24 h time frame presented a challenge for Windowmount live imaging,  
564 which typically yields movies ~8-20 h in duration.) A differentiating cell may require this time to  
565 construct the umbrella SJ and microvilli-lined PAAC—large structures that will undergo extensive  
566 remodeling in subsequent stages. The indirect, more complex nature of PAAC-mediated integration  
567 provides an additional layer of protection for differentiating cells—a potentially worthwhile tradeoff  
568 for a functionally active organ that continuously processes substances from the external  
569 environment.

570 How do SJs guide differentiating cells into the epithelial sheet? One appealing notion is that  
571 they exert myosin-based pulling forces that draw differentiating cells toward the lumen  
572 (Varadarajan et al., 2019; Yu and Zallen, 2020). We were, however, unable to identify any impact on  
573 integration following enteroblast-specific inhibition of Rho kinase (Rok; data not shown). Since Rok  
574 is an essential activator of myosin contractility, this finding implies that myosin-based forces are not  
575 required in the integrating cell. A second possibility is that myosin-based pulling forces, or some  
576 other cytoskeletal regulator, is required in mature neighbor cells to aid the basal-to-apical movement  
577 of differentiating cells. Since SJs bond together mature and differentiating cells, they are well-  
578 positioned to coordinate these two cell types during integration. Finally, SJs may serve to polarize  
579 growth and/or cytoskeletal assembly along the apical-basal axis of the differentiating cell (Madara,  
580 1987).

## 581 **Diverse epithelial architectures may use a diversity of cell assimilation mechanisms**

582 Numerous barrier epithelia, including mammalian trachea, cornea, and olfactory lining, have  
583 a cellular organization similar to the fly gut (Chepko and Dickson, 2003; Chepko and Smith, 1997;  
584 Cotsarelis et al., 1989; Evans and Moller, 1991; Leung et al., 2007; Michael J. Evans, 2001; Rock et al.,  
585 2009; Sekiya et al., 1988; Tsujimura et al., 2002). All these tissues are renewed by basally localized  
586 stem cells that lack occluding junctions and lumenal-apical surfaces. Their daughter cells thus all  
587 face the same architectural challenge of integrating seamlessly into the barrier while they differenti-  
588 ate. Whether they overcome this challenge through PAAC-mediated integration, like the fly gut, or  
589 through some other, perhaps as-yet-undefined, mechanism will be an interesting question for future  
590 investigation.



591 In considering how epithelial architecture affects new cell integration, it is notable that two  
592 of the best-understood barrier epithelia, mammalian intestine and lung alveoli, sidestep the  
593 challenge of barrier integration entirely. In these tissues, stem cells possess both occluding junctions  
594 and luminal-apical surfaces, and daughter cells symmetrically inherit these structures from their  
595 mother (Fig. 7C) (DeMaio et al., 2009; Fleming et al., 2007; Jinguji and Ishikawa, 1992; McKinley et  
596 al., 2018). Symmetric inheritance is morphogenetically parsimonious, but it requires the abscission of  
597 existing junctional septa and creation of new septa at the new daughter-daughter interface. Since  
598 this remodeling happens at the luminal surface, it might produce potential weak points in the bar-  
599 rier. Thus, at first glance, the fact that mammalian intestine and lung use symmetric inheritance to  
600 assimilate new cells seems at odds with the idea that physiologically active epithelia need extra safe-  
601 guards to protect barrier integrity.

602 We speculate, however, that this potential risk is mitigated by these tissues' particular  
603 architecture; namely, deeply recessed niches—intestinal crypts and terminal alveolar endbuds—in  
604 which the lumen-exposed stem cells reside. Crypts and endbuds are secluded from bulk luminal  
605 flow, which provides their resident stem cells with built-in protection that stem cells in other  
606 epithelia lack. This built-in protection conceivably affords stem cell daughters the simplicity of  
607 directly inheriting barrier structures from their mother cell. In this light, PAACs may be seen as a  
608 cellular-scale solution for epithelia that lack recessed stem cell niches, the tissue-scale solution for  
609 protecting new cells. As such, our findings spotlight the intimate relationship between physiological  
610 function, organ form, and cellular differentiation and morphogenesis.

611

## 612 MATERIALS and METHODS

### 613 *Drosophila* husbandry

614 Mated adult female flies were used in all experiments. Crosses utilizing the TARGET system  
615 (GAL4/GAL80<sup>ts</sup>) were performed at 18°C (McGuire et al., 2003). Upon eclosion, adult animals were  
616 temperature shifted to 29°C for 4 days to inactivate GAL80<sup>ts</sup> and induce GAL4-mediated expression.  
617 Midguts were harvested for immunostaining 4 days after induction. Flies used for  
618 immunofluorescence were raised on standard molasses medium at 18°C. Upon eclosion, they were  
619 shifted to 29°C. Midguts were harvested for immunostaining 4 days after eclosion.

### 620 Immunohistochemistry and sample preparation for confocal microscopy

621 Dissected guts were fixed in 4% formaldehyde in PBS (pH 7.4) at room temperature for 1  
622 hour, immunostained, and mounted as previously described (O'Brien et al., 2011). Primary  
623 antibodies: mouse anti-Armadillo (1:100, DSHB N2 7A1), rabbit anti-Snakeskin (1:1000, gift from  
624 Furuse lab), mouse anti-Coracle (1:50, DSHB C615.16), mouse anti- $\beta$ -galactosidase (1:400, Promega  
625 Z3781), rabbit anti-Phospho4EBP1 (1:500, Cell Signaling). Secondary antibodies: donkey anti-rabbit  
626 IgG conjugated to Alexa 555 and donkey anti-mouse IgG conjugated to Alexa 647 (1:1000, Invitrogen  
627 A-31572 and A-31571, respectively). Nuclei were stained with DAPI (LifeTechnologies D1306).  
628 Samples were incubated with primary antibody overnight at 4°C in PBT (PBS with 3% Triton X-100  
629 (Sigma-Aldrich X100-100 mL)) with 5% NGS (Capralogics GS0250), washed 3 times in PBT, then  
630 incubated with secondary antibody for 4 hours at room temperature in PBT with 5% NGS. Samples  
631 were mounted in ProLong (LifeTechnologies P36984) and stored at -20°C until imaging.

### 632 Induction of MARCM clones

633 Heat-shock MARCM clones (Lee and Luo, 1999) were generated by collecting adult flies 12-  
634 24 hours post-eclosion and performing two 45-min, 37°C heat shocks separated by a 8-min chill on  
635 ice. Flies were returned to 25°C for 4 days, then dissected and analysed.

### 636 Fixed sample imaging

637 Fixed samples were imaged on a Leica SP8 WLL confocal microscope with a 63x HC PL APO  
638 CS2 oil objective. Serial optical sections were taken at 0.5  $\mu$ m intervals through the entirety of whole-  
639 mounted, immunostained midguts.

### 640 Quantitation of SJ-contacting and non-contacting cells

641 Enteroblasts in the midgut R4ab region (also known as P1/2) (Buchon et al., 2013; Marianes  
642 and Spradling, 2013; O'Brien, 2013) were visualized and counted using ImageJ/Fiji (Schindelin et al.,  
643 2012). The R4ab region was identified using morphological landmarks. SJs were identified by  
644 immunostaining for the SJ component Snakeskin. Su(H)-lacZ<sup>+</sup> ( $\beta$ -Gal<sup>+</sup>) cells were recognized as  
645 enteroblasts by visual inspection. To categorize enteroblasts as SJ-contacting or non-contacting, each  
646 enteroblast was analyzed through Fiji Orthogonal View. Enteroblasts were defined as SJ-contacting  
647 cells if the  $\beta$ -Gal<sup>+</sup> signal was juxtaposed and/or displayed overlap with apical Snakeskin signal in  
648 XY, XZ and YZ planes. Enteroblasts were defined as SJ non-contacting cells if they lacked these  
649 criteria.

## 650 **Measurements of cell volume**

651 To measure volumes of *Su(H)-lacZ*<sup>+</sup> cells, tissues were fixed, immunostained using anti-β-  
652 galactosidase antibody, mounted, and subjected to volumetric confocal imaging. After initial  
653 processing in Fiji, files were imported to Bitplane Imaris v.8.7. Volumes of *Su(H)-lacZ*<sup>+</sup> cells were  
654 determined by creating a surface for each cell using the Imaris contour tool and then measuring the  
655 enclosed volume.

## 656 **Ovary dissection and staining**

657 Egg chambers were dissected in phosphate-buffered saline (PBS pH 7.4) + 0.1% Triton X-100  
658 and incubated for 2 hours in 1mM latrunculin B (LatB; Sigma). They were then fixed 20 min in 4%  
659 PFA (in PBS pH 7.4), incubated 2 hours in a 1:250 dilution of TRITC-conjugated phalloidin  
660 (Molecular Probes, Eugene, OR), and subsequently imaged on a Zeiss LSM 700 confocal microscope.

## 661 **Total cell and total enteroblast counts**

662 To perform total cell counts and total enteroblast counts of R4ab, confocal image stacks were  
663 digitally isolated in Fiji. Bitplane Imaris was used generate three-dimensional organ reconstructions,  
664 and individual cells were comprehensively counted by mapping signals for DAPI (for total cell  
665 counts) or *Su(H)-lacZ* (for total enteroblast counts) to Imaris surface objects. Imaris-recognized  
666 surfaces were confirmed through visual inspection and manually adjusted when needed for  
667 accuracy.

## 668 ***In vivo* live imaging and movie analyses**

669 Live imaging was performed on 2-3 day old adult females as described previously (Martin et  
670 al., 2018), with the following modifications: For Video 4, 20 nM RU486 and 10 μg/mL Isradipine  
671 were added to the imaging media to induce GeneSwitch5966 expression and reduce intestinal  
672 peristalsis, respectively. For Video 5, 10 μg/mL Isradipine was added to the imaging media to  
673 reduce intestinal peristalsis.

674 Videos were acquired with a LSM Leica SP5 with a HCX APO L 20x/ 1.00W lens, controlled  
675 by LAS AF software. Confocal sections were taken every 15 mins with z-steps of 1.01μm (Video 4)  
676 and 2.98 μm (Video 5). Videos were processed on a Windows computer (Windows 10 Education)  
677 with a 3.70 GHz quad-core Intel Xeon processor and 256 GB memory. Videos were initially  
678 processed in Fiji and subsequently visualized in volumetric format and analyzed in Bitplane Imaris.  
679 For Video 4, the following Fiji plugins were applied: 1) Stack Sorter  
680 (<https://www.optinav.info/Stack-Sorter.htm>), to correct the alignment of out-of-order slices  
681 captured during a peristaltic contraction, 2) StackReg (Arganda-Carreras et al., 2006) to correct for  
682 whole-organ X-Y movements, 3) Correct 3D Drift (Parslow et al., 2014) to correct for global volume  
683 movements, and 4) TrakEM2 (Cardona et al., 2012) to perform manual X-Y alignment for slices that  
684 could not be registered automatically. The latter 3 plugins were applied iteratively as needed. For  
685 Video 5, Stack Sorter, StackRed, and Correct 3D Drift were used. The latter two plugins were  
686 applied iteratively as needed.

## 687 **Measurements of cross-sectional cell area in live movies**

688 The cross-sectional area of the integrating *Su(H)-mCherry*<sup>+</sup> cell at each timepoint in Video 4  
689 was determined as follows: The cell's largest cross-sectional plane at each time point was identified

690 by visual inspection. FIJI Measure was used to manually outline the mCherry signal in this plane  
691 and to measure the enclosed area.

## 692 **Sample preparation for FIB-SEM**

693 Fly guts were dissected in PBS and immediately processed as previously described (Daniel et  
694 al., 2018; Kolotuev, 2014). Briefly, the samples were fixed in 1% formaldehyde, 2.5% glutaraldehyde  
695 in 0.1M phosphate buffer (PB) for 2 hours at room temperature, then incubated for 1 hour in 2%  
696 (wt/vol) osmium tetroxide and 1.5% (wt/vol) K<sub>4</sub>[Fe(CN)<sub>6</sub>] in PB followed by 1 hour in 1% (wt/vol)  
697 tannic acid in 100 mM cacodylate buffer, then 30 minutes in 2% (wt/vol) osmium tetroxide in water  
698 followed by 1% (wt/vol) uranyl acetate for 2 hours at room temperature. After the dehydration  
699 cycles, samples were embedded in Epon-Araldite mix. Samples were flat embedded to assure the  
700 targeting of the region of Interest during the sectioning step.

## 701 **Sample preparation for CLEM**

702 To preserve native fluorescence for correlative light/electron microscopy, samples were  
703 subjected to high-pressure freezing followed by rapid freeze-substitution, as previously described  
704 (Kolotuev, 2014; Kolotuev et al., 2010). Dissected guts were immediately transferred to large high  
705 pressure freezing carriers filled with 20% bovine serum albumin for cryo-protection and frozen  
706 using the standard procedure according to the manufacturer's instructions (High Pressure Freezing  
707 Machine HPF Compact 02, Engineering Office M. Wohlwend GmbH, Sennwald, Switzerland).  
708 Samples were substituted in an AFS2 machine (Leica) with 0.1% uranyl acetate diluted in anhydrous  
709 acetone and embedded in HM20 acrylic resin mix (Electron Microscopy Sciences). To assure precise  
710 orientation of the samples, the flat embedding procedure was used (Kolotuev, 2014).

## 711 **Electron microscopy image acquisition and analysis**

712 Polymerized flat blocks were trimmed using a 90° diamond trim tool (Diatome, Biel,  
713 Switzerland) mounted on a Leica UC6 microtome. Transmission electron microscopy samples were  
714 analyzed with an FEI CM100 electron microscope operated at 80kV, equipped with a TVIPS camera  
715 piloted by the EMTVIPS program.

716 Samples for CLEM were sectioned at 100-150 nm thickness and transferred to wafers using  
717 an array tomography protocol (Burel et al., 2018; Kolotuev and Micheva, 2019). CLEM wafers were  
718 first imaged for fluorescence signal using a Zeiss fluorescent microscope equipped with DAPI and  
719 GFP filters using 20x and 60x objectives. To analyze the ultrastructure, sections on wafer were  
720 contrasted with uranyl acetate and lead citrate and observed using an FEI Quanta 250 FEG scanning  
721 electron microscope (FEI, Eindhoven). The imaging settings were as follows: accelerating voltage,  
722 10kV; spot size, 5; image dimensions, 4096x4096; pixel dwell time, 10 $\mu$ s.

723 FIB-SEM tomography was done with a Helios 650 (FEI, Eindhoven). FIBbing conditions were  
724 30 keV, 770 pA, 30-40 nm slice thickness (specified in text for each experiment) at a tilt angle of 52°  
725 and a working distance of 13 mm. For imaging the block face was tilted normal towards the electron  
726 beam (Kizilyaprak et al., 2015). The imaging conditions were: 2 keV, 800 pA, 20  $\mu$ s dwell time, with a  
727 frame size of 6144 x 4096 and a pixel size of 9.7 nm. For publication, the image contrast was  
728 inverted.

729 IMOD (Kremer et al., 1996) was used to convert raw data from sequential sections to an MRC  
730 file stack and also used for alignment of serial sections and volumetric rendering. Adobe Photoshop  
731 was used for image adjustment, layers superposition, annotations, pseudo-coloring of image zones,  
732 and volume reconstructions.

733 **Volumetric rendering of FIB-SEM images**

734 Serial sections were stacked and aligned using the cross-correlation function of IMOD, which  
735 was also used to trace and reconstruct specific regions. Drawing tools were used for outlining  
736 subcellular features (e.g., septate junctions, plasma membrane, nuclei, PAAC) on the EM layers. The  
737 3D reconstruction surfaces were Meshed in Model View/ Objects tool. Images were captured using  
738 the Model View /Movie Montage tool and reformatted into .avi format using Fiji.

739

740 **FUNDING SOURCES**

741 P.M.R. was supported by a Stanford Bio-X Bowes Graduate Fellowship, an EMBO Short-  
742 Term Travelling Fellowship, and a Stanford DARE Graduate Fellowship (Diversifying Academia,  
743 Recruiting Excellence). The authors acknowledge the financial support by the Faculty of Biology and  
744 Medicine of the University of Lausanne and of the Swiss National Science Foundation, R'Equip  
745 Grant 316030\_128692. This work was supported by NIH R01GM116000-01A1, NIH R35GM141885-  
746 01, and ACS RSG-17-167-01 to L.E.O.

747 **ACKNOWLEDGEMENTS**

748 We are grateful to Allison Bardin, David Bilder, Nicolas Buchon, Joaquin de Navascues,  
749 Mikio Furuse, Yoshihiro Inoue, Henri Jasper, Sarah Siegrist, Norbert Perrimon, Nicolas Tapon,  
750 Charles Xu, and *Drosophila* stock centers (Bloomington *Drosophila* Stock Center (NIH  
751 P40OD018537), Vienna *Drosophila* Resource Center (Dietzl et al., 2007), Kyoto *Drosophila* Genomics  
752 and Genetic Resources) for fly stocks; Mikio Furuse, Claire Thomas, Steven Russell, and Xiaohang  
753 Yang for antibodies; and Jon Mulholland and Kitty Lee for microscopy support. Confocal  
754 microscopy was performed at the Stanford Beckman Cell Sciences Imaging Facility (NIH  
755 1S10OD01058001A1, NIH 1S10OD010580). We thank David Bryant, Tobias Reiff, Daniel St. Johnston,  
756 Jia Chen, and members of the O'Brien lab for invaluable discussions. Fly extract was obtained from  
757 the *Drosophila* Genomics Resource Center (NIH 2P40OD010949).

758

759

760 **FIGURES and CAPTIONS**

761 **Figure 1**

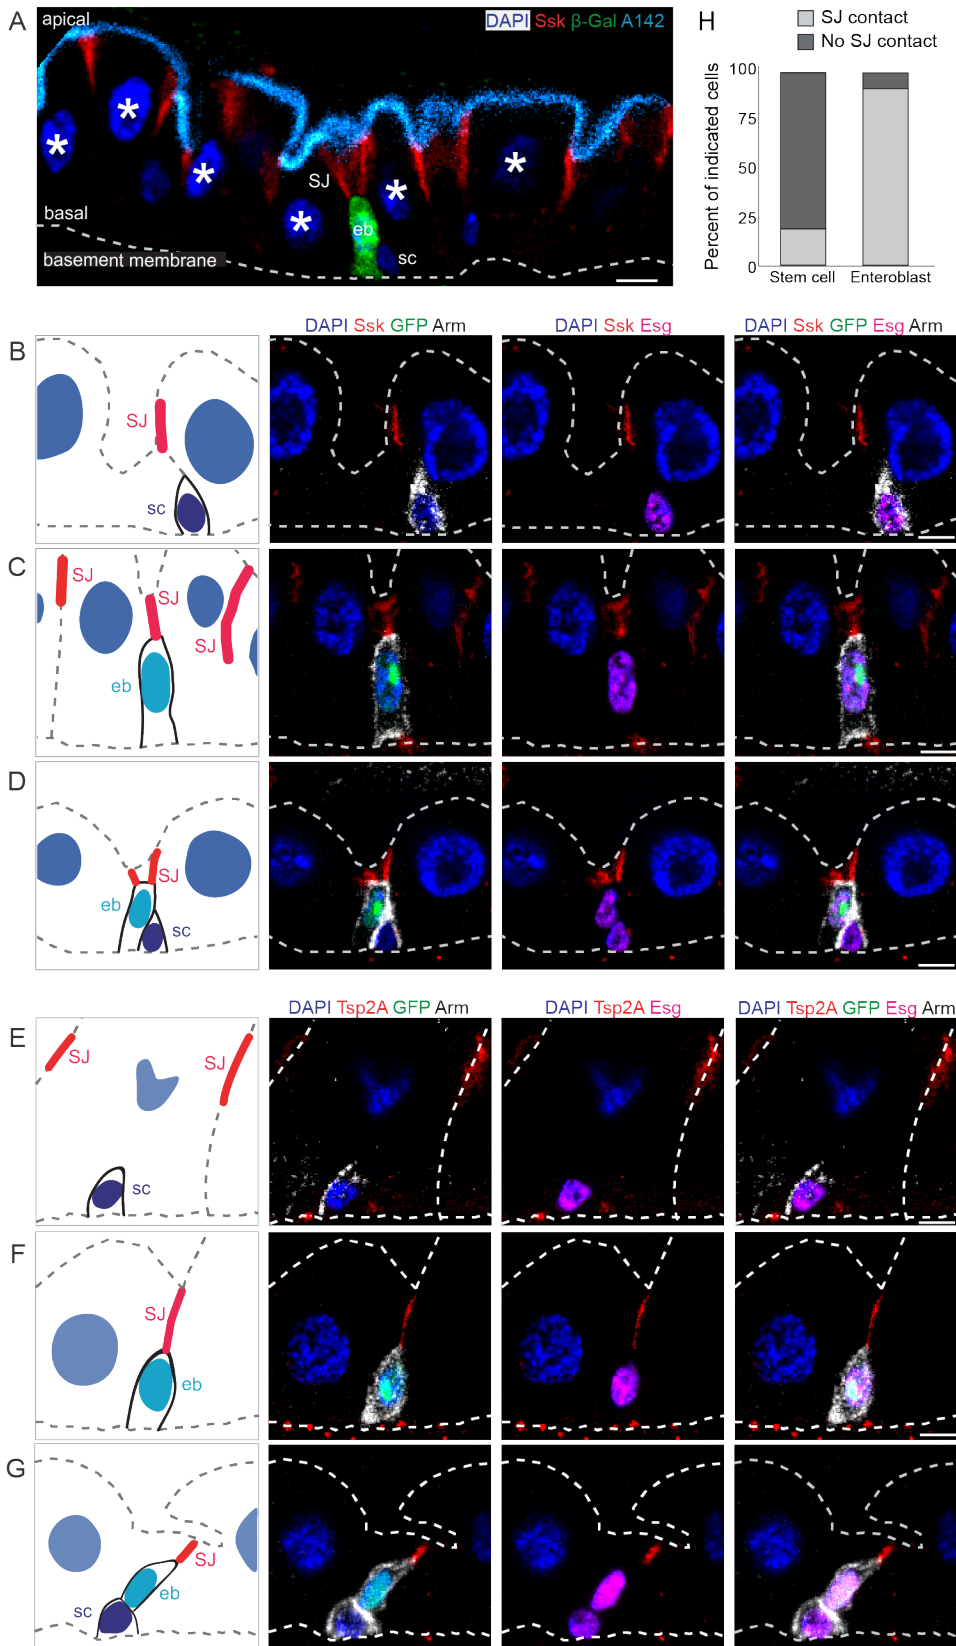

762

763 **Figure 1. The apical tip of a differentiating enteroblast contacts the SJ of its neighbor**  
764 **enterocytes.**

765 (A) Architecture and stem cell lineage of the fly midgut epithelium, shown in cross-sectional  
766 view with apical luminal surface (cyan, Mdu::GFP; *c.f.* Fig. S2) at top and basal surface (dotted line,  
767 basement membrane) at bottom. Three cell types make up the absorptive lineage: (1) Stem cells (sc)  
768 are basally localized, diploid cells that do not express *Su(H)-lacZ*. (2) Enteroblasts (eb) are terminally  
769 committed stem cell progeny. Enteroblasts are transitioning from stem-like cells to enterocytes and  
770 are marked by *Su(H)-lacZ* expression (green,  $\beta$ -Gal). Stem cells and enteroblasts often appear in  
771 pairs. (3) Mature enterocytes are large cells with polyploid nuclei (asterisks). Septate junctions (SJ;  
772 red, Snakeskin) appear at the apico-lateral borders of enterocytes.

773 (B-G) Stem cells do not overlap with SJs, while the apical tips of enteroblasts contact the basal  
774 termini of enterocyte-enterocyte SJs. Cartoons (left column) and channel overlays from 5-channel  
775 multi-photon laser microscopy of *esgGALA*, *UAS-his2b::CFP*; *Su(H)-GFP:nls* midguts immunostained  
776 for SJ components Ssk (red, B-D) or Tsp2a (red, E-G) and for the stem cell/enteroblast marker Arm  
777 (white; cortical). *esg*-driven His2b::CFP is shown in magenta, *Su(H)*-driven GFP:nls in green and  
778 nuclei (DAPI) in blue. Luminal epithelial surface and basement membrane are indicated by dotted  
779 gray lines. Stem cells (sc) are His::CFP<sup>+</sup>, Arm<sup>+</sup>, GFP:nls<sup>-</sup> cells in Panels B, D, E, G; enteroblasts (eb)  
780 are His::CFP<sup>+</sup>, Arm<sup>+</sup>, GFP:nls<sup>+</sup> cells in Panels C, D, F, G. Panels D and G show stem cell-enteroblast  
781 pairs. All scale bars: 5 $\mu$ m. Images are projections of short confocal stacks. Full genotypes in Table 1.

782 (H) Quantitation of B-G. Most enteroblasts (92%), but few stem cells (19%) contact the  
783 epithelial septate junction network. N=5 midguts; n=119 stem cells and 125 enteroblasts.

784

785 **Figure 2**

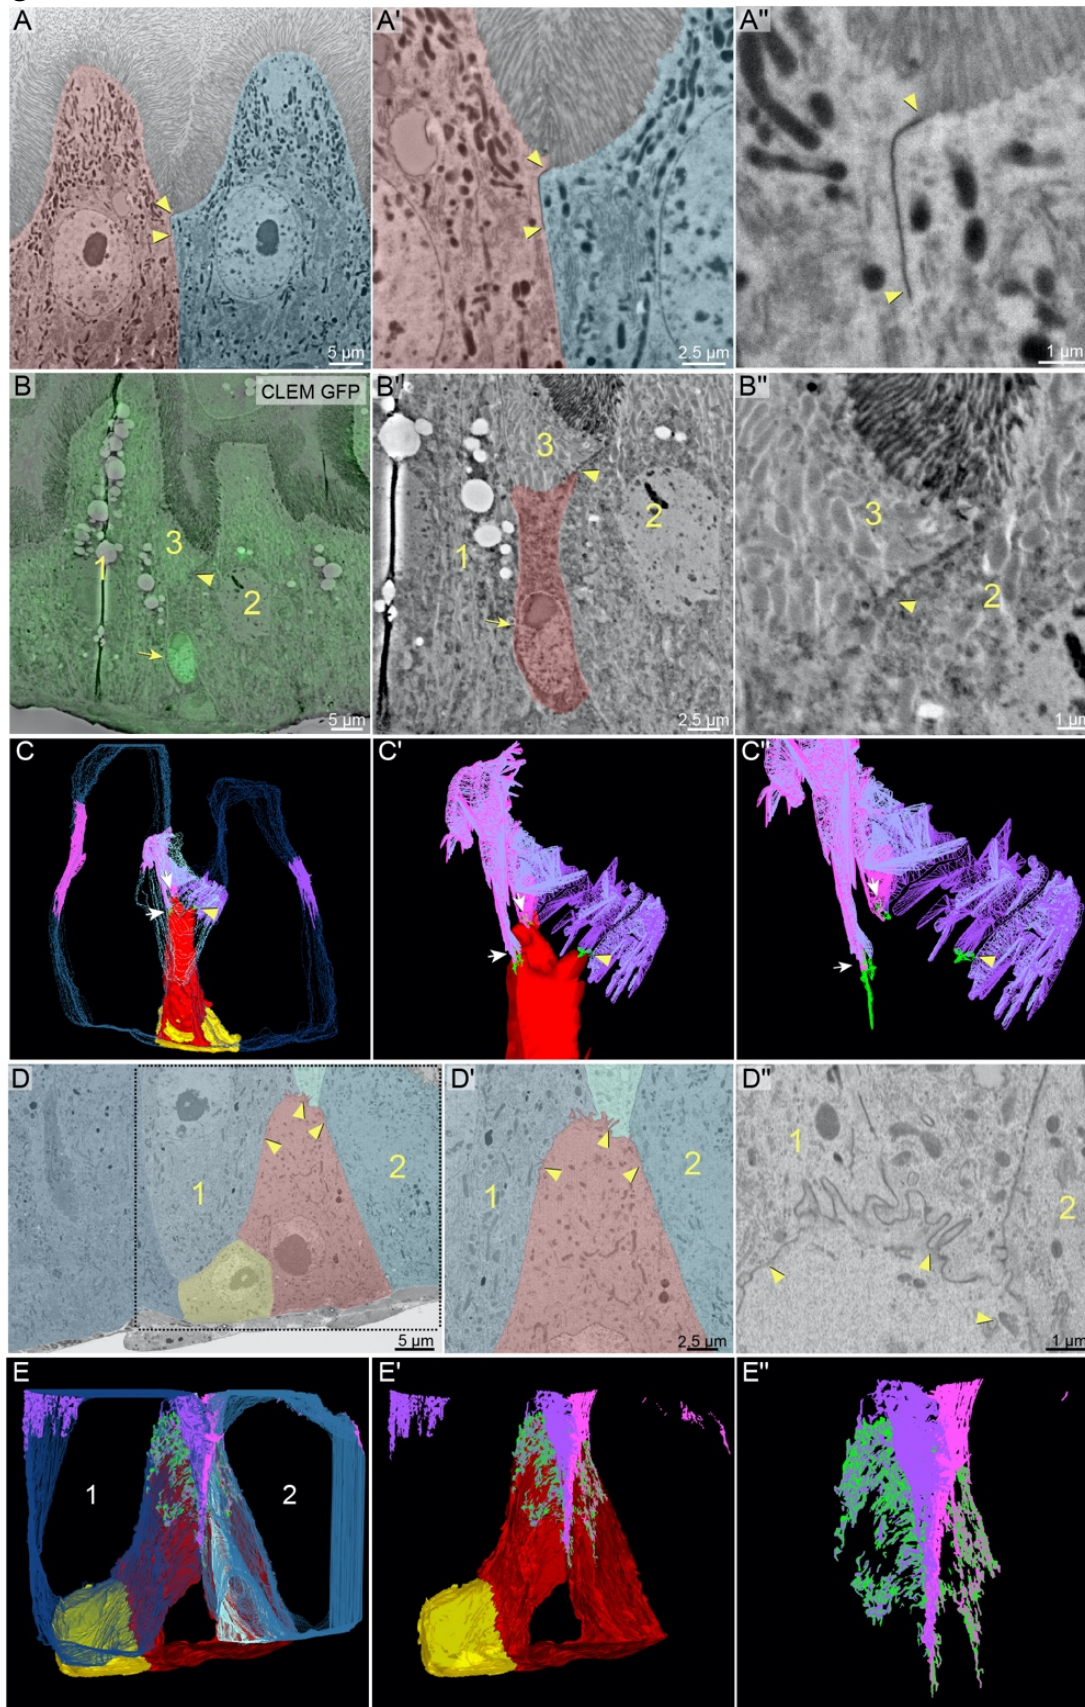

786  
787



788 **Figure 2. The differentiating enteroblast's apex initiates a new SJ at the basal-most edge**  
789 **of mature enterocyte SJs and triggers their remodeling to form a basally-extended SJ**  
790 **sheet.**

791 (A) Mature enterocytes localize SJs to the boundary between lumen-facing, brush border  
792 apical membranes and lateral membranes. SEM shows two mature enterocytes (pink and blue  
793 pseudocolor). Apical membranes are identifiable as microvilli-rich brush borders. An electron-dense  
794 SJ (arrowheads) fuses together the enterocytes' lateral membranes at a site directly adjacent to these  
795 brush borders. Zoomed-in views of SJ in A are shown in A' and A''.

796 (B-C) The apex (apical-most tip) of a young, Su(H)<sup>+</sup> enteroblast initiates SJ adhesions at the  
797 basal edge of enterocyte SJs. CLEM overlay (B) identifies a Su(H)-GFP::nls<sup>+</sup> enteroblast (arrow) in a  
798 FIB- SEM section. Zoomed-in images of the enteroblast (B', red pseudocolor) and of the enteroblast  
799 apex (B'') show a nascent SJ (arrowheads in B-B'') between the enteroblast and neighbor enterocytes  
800 2 and 3 (labelled). (Only a small wedge of enterocyte 3 is visible in this section.) See Fig. S1.  
801 Volumetric rendering (C) of 30 FIB-SEM sections, including the section in B, reveals that each of  
802 apex's three fingers forms a SJ (arrows and arrowhead; arrowhead points to the same SJ in B and C)  
803 with each of three neighbor enterocytes. Cells and SJs are color coded: enteroblast, red; enteroblast  
804 SJs, green; enterocytes 1-3, blue; enterocyte 1 SJs, magenta; enterocyte 2 SJs, light purple; enterocyte  
805 3 SJs, light blue; stem cell, yellow. Zoomed-in views of the enteroblast apex and associated SJs are  
806 shown in C' and C''. See Video 1.

807 (D-E) An older enteroblast is blanketed by the broad, basally extended SJ it has formed with  
808 the lateral membranes of neighboring mature cells. A FIB-SEM section (D) shows an enteroblast (red  
809 pseudocolor), two mature enterocytes (cells 1 and 2; blue pseudocolor), a mature enteroendocrine  
810 cell (cell 3; light blue pseudocolor), and a presumptive stem cell (yellow pseudocolor). The apical  
811 third of the enteroblast has formed an SJ (arrowheads in D-D'') with the lateral membranes of the  
812 mature cells. Zoomed-in views of the enteroblast apex are shown in D' and D''. Volumetric  
813 rendering (E) of 413 FIB-SEM sections, including the section in D, reveals basal extensions of both  
814 enteroblast-enterocyte SJs and associated enterocyte-enterocyte SJs. View of the SJ with only the  
815 enteroblast and stem cell is shown in E'. Zoomed-in view of the SJ alone is shown in E''. Cells and  
816 SJs are color coded: enteroblast, red; enteroblast SJ, green; enterocytes 1 and 2, blue; enterocyte 1 SJ,  
817 lavender; enterocyte 2 SJ, magenta; enteroendocrine cell, light blue; stem cell, yellow. See Video 2.  
818 Full genotypes in Table 1.

819

820 **Figure S1 (related to Figure 2C)**

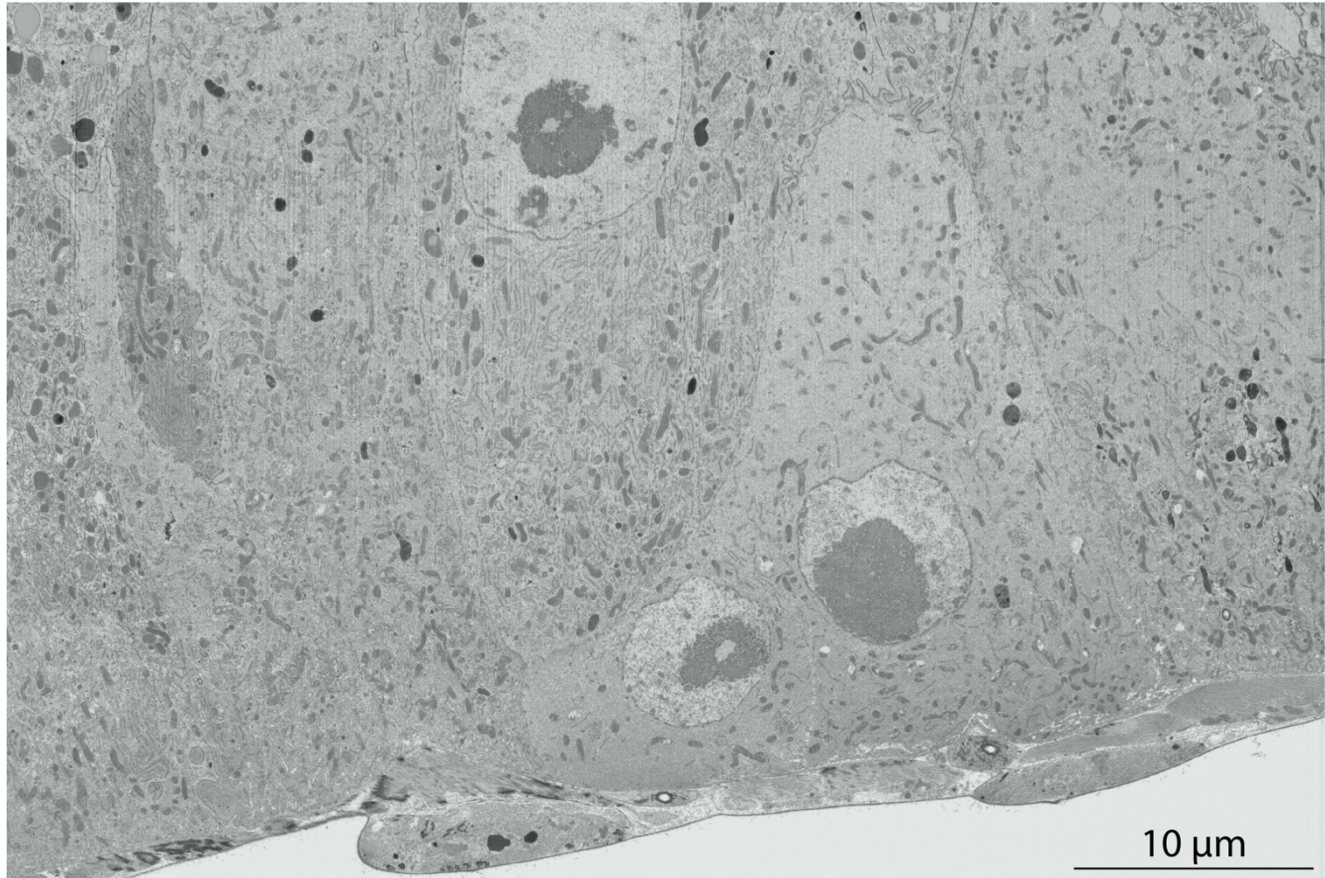

821

822 **Figure S1 (related to Figure 2D). High resolution view of FIB-SEM section shown in**  
823 **Figure 2D.**

824 30 nm-thick sections were cut with a gallium ion beam at 30 keV and 770 pA. Images were  
825 taken with the electron beam at 2 keV, 0.8 nA, 2 mm working distance, 20 μs dwell time, 6144x4096  
826 pixel frame size. Pixel size 9.7nm. Full genotypes in Table 1.

827 **Video 1 (related to Figure 2C). Three-dimensional ultrastructure of nascent SJ between**  
828 **Su(H)-GFP::nls<sup>+</sup> enteroblast and mature enterocytes.**

829 Tomographic reconstruction of 30 serial images, including the image in Fig. 2B, from midgut  
830 expressing *Su(H)-GFP::nls*. Serial sections were cut with a gallium ion beam at 10kV, spot size 5,  
831 pixel frame size 4096x4096, pixel dwell time 10μs. Pixel size 8.7nm. Slice thickness, 150nm. Volume  
832 of reconstruction, 35.6μm x 35.6μm x 4.5μm. Full genotypes in Table 1.

833 **Video 2 (related to Figure 2E). Three-dimensional ultrastructure of SJ 'cap' between**  
834 **enteroblast and mature cells.**

835 Tomographic reconstruction of 413 serial FIB-SEM images, including the image shown in  
836 Figs. 2C and S1. Volume of reconstruction, 55 μm x 36.6 μm x 12.3 μm. Slice thickness, 30nm. Full  
837 genotypes in Table 1.

838

839

### Figure 3

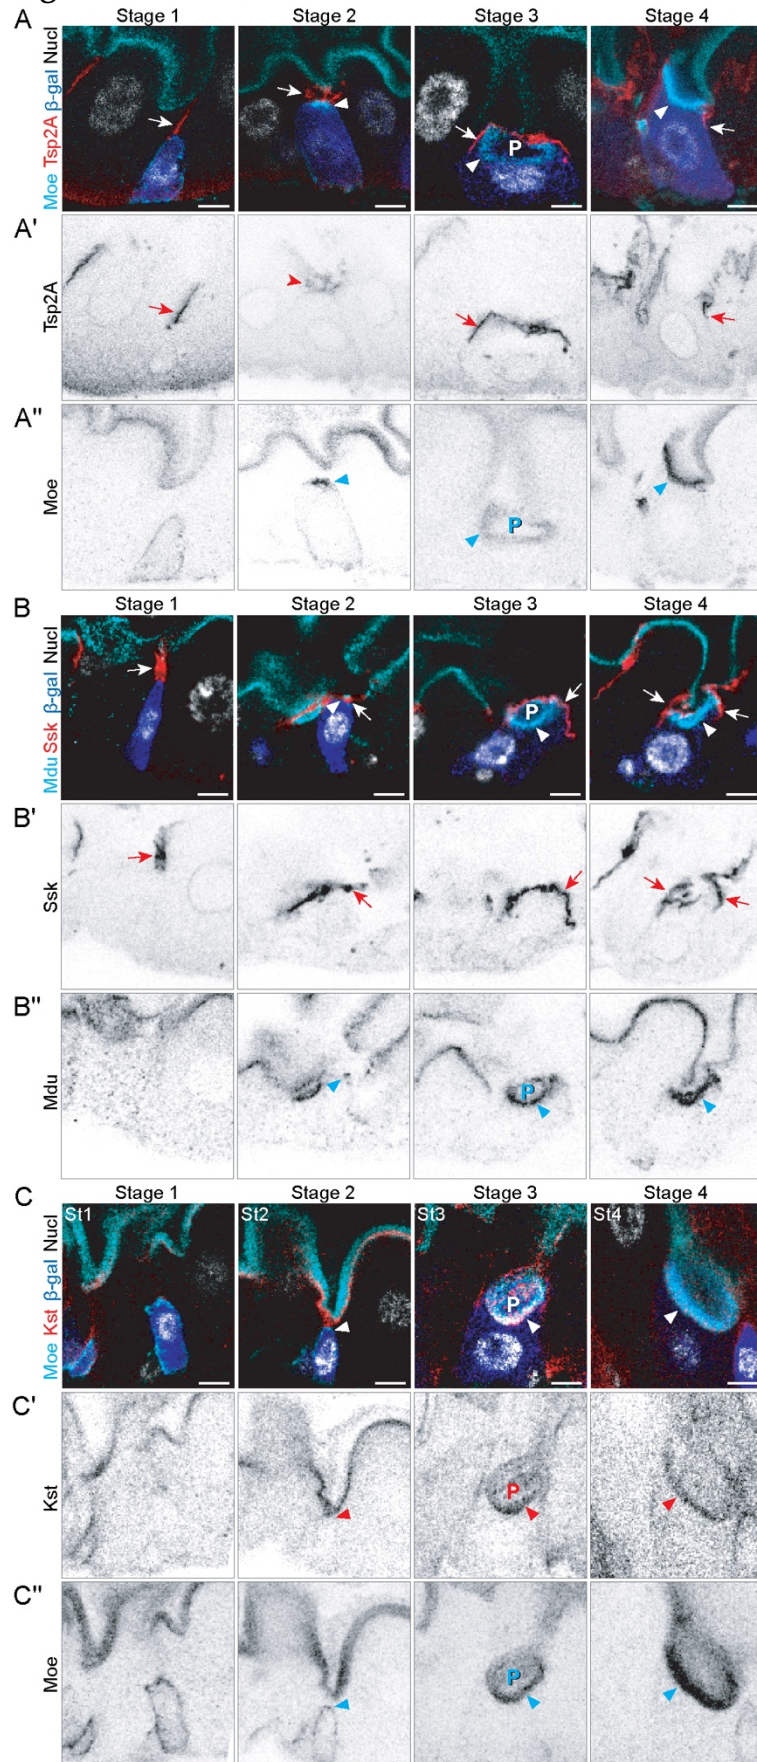

840

841 **Figure 3. SJ and apical membrane morphology define four stages of barrier integration.**

842 As differentiating cells integrate, they pass through four morphological stages that are  
843 distinguishable by SJ localization, polarization of apical markers, and cellular/nuclear size. SJs  
844 shown in red (A, Tsp2A; B, Ssk). Markers of enterocyte apical polarity shown in either cyan (A, C  
845 Moe::GFP; B, Mdu::GFP; *c.f.* Fig. S2) or red (C, Kst). Su(H)-lacZ in blue ( $\beta$ -Gal, A-C). Nuclei (Nucl)  
846 shown in grayscale (A, Stage 1 and C – His2av::mRFP; A, Stages 2-4 and B – DAPI). Images are  
847 projections of short confocal stacks. Markers that are not fused to a fluorescent protein were  
848 visualized by immunostaining. All scale bars, 5  $\mu$ m.  $\beta$ -gal channel shown in Fig. S3. Full genotypes  
849 in Table 1.

850 Stage 1 (St1). Enteroblast with initial SJ contact. The apex of a diploid enteroblast contacts the  
851 basal terminus of an enterocyte-enterocyte SJ (arrows). Apical markers are either non-polarized  
852 (Moe, Kst) or absent (Mdu).

853 Stage 2 (St2). Enteroblast with broadened SJ contacts and apical plaque. The enteroblast apex  
854 is partially covered by a widened enteroblast-enterocyte SJ (arrows). Some apical markers (Moe,  
855 Mdu; arrowheads) become polarized to the apex, forming a plaque immediately basal to the SJ.

856 Stage 3 (St3). Pre-enterocyte with umbrella-like SJ and concave apical structure (PAAC). The  
857 apex of the cell is fully covered by a convex SJ (arrows). Apical markers outline a prominent concave  
858 structure (P; Pre-Assembled Apical Compartment, or PAAC) beneath the SJ. The PAAC fills the  
859 apex of the cell and is separate from the gut lumen (Video 3). Pre-enterocytes exhibit  
860 cytoplasmic/nuclear sizes intermediate between enteroblasts and mature enterocytes and low  
861 Su(H)-driven  $\beta$ -gal signal (Fig. S3).

862 Stage 4 (St4). Pre-enterocyte integration becomes complete. The SJ circumscribes the cell, and  
863 the PAAC has coalesced with the gut lumen. The pre-enterocyte is still smaller than mature  
864 enterocytes and has a concave, rather than convex apical-luminal surface, but the relative  
865 arrangement of its SJ, apical, and basolateral surfaces are topologically equivalent to a mature  
866 enterocyte.

867

868

## Figure S2

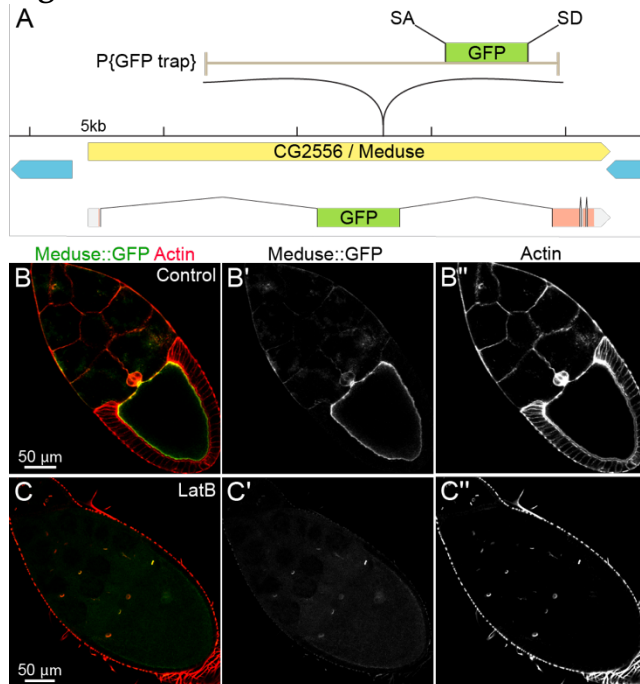

869

### 870 **Figure S2 (related to Figure 3A-C). The A142 splice trap transposon is inserted into** 871 **CG2556/Meduse, a novel protein that co-localizes with actin filaments.**

872 (A) Genomic location of the splice trap transposon in the A142 line. The insertion was  
873 mapped by inverse PCR and genomic PCR to the large first intron of CG2556, approximately 10.6 kb  
874 downstream of the splice site in Exon 1. The transposon is inserted in the proper orientation to  
875 capture transcripts from CG2556, which would result in an N-terminal GFP tag on the nearly  
876 undisrupted protein (Exon 1 encodes only 7 amino acids including the initiator Met). The tentacular  
877 appearance of the fusion protein in oocytes prompted us to name the gene Meduse (Mdu).

878 (B) Mdu::GFP co-localizes with cortical actin filaments in Stage 10 oocytes.

879 (C) Latrunculin B (LatB) treatment disrupts cortical actin filaments (red, Rhodamin-  
880 phalloidin) in the oocyte and leads to abrogation of the oocyte Mdu::GFP signal. Note that LatB does  
881 not disrupt actin in ring canals; localization of Mdu::GFP to ring canals is visible in Panels C and C'.  
882 Full genotype in Table 1.

883

884

### Figure S3 (related to Figure 3A-C)

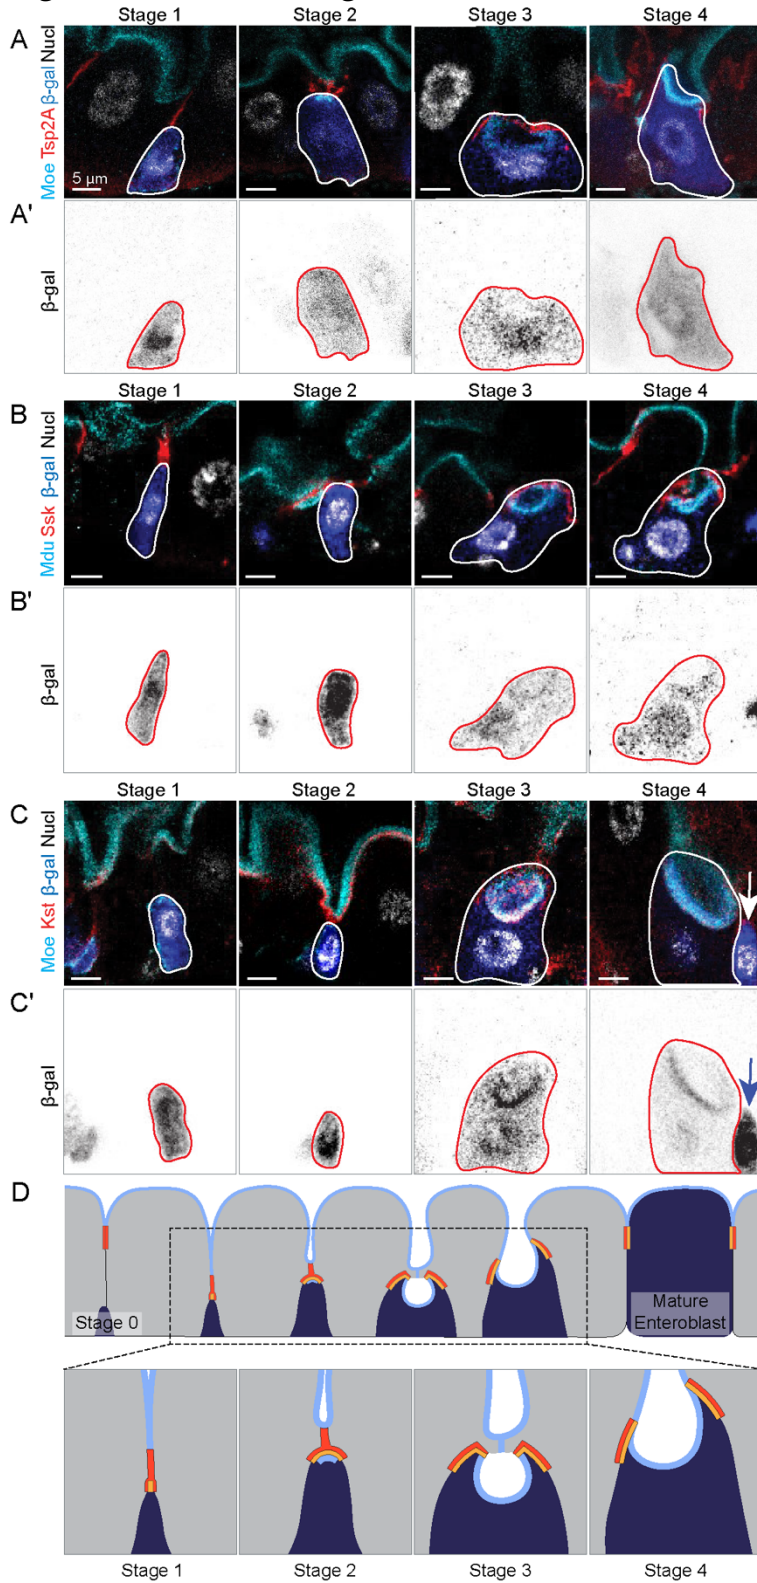

885

886 **Figure S3 (related to Figure 3A-C). Immunostaining of *Su(H)*-driven  $\beta$ -galactosidase in**  
887 **integrating cells.**

888 (A-C) The same four-channel images shown in Figure 3 are repeated above the  
889 corresponding, single-channel images of  $\beta$ -galactosidase immunostain. The presence of

890  $\beta$ -galactosidase in Stage 3 and Stage 4 cells demonstrates that these cells derived recently from  
891 enteroblasts. During acquisition of the Stage 3 and 4 images, the gain was increased compared to  
892 Stages 1 and 2 to visualize lower levels of  $\beta$ -galactosidase. Arrowheads in C and C' point to a Stage 1  
893 enteroblast next to the Stage 4 pre-enterocyte; at the higher gain necessary to visualize  $\beta$ -  
894 galactosidase in the Stage 4 pre-enterocyte,  $\beta$ -galactosidase intensity in the Stage 1 enteroblast is  
895 overexposed. Images are projections of short confocal stacks.

896 (D) Four-stage model of epithelial integration. A newborn enteroblast (Stage 0) forms SJ  
897 contacts between their apex and the basal edge of enterocyte-enterocyte SJs (Stage 1). The  
898 enteroblast-enterocyte SJ broadens, and apical markers accumulate at its cytoplasmic face (Stage 2).  
899 The enteroblast grows into a pre-enterocyte, characterized by the expansion of apical markers into a  
900 PAAC and broadening of the SJ into a diaphragm-like sheet (Stage 3). The PAAC's lumen fuses with  
901 the gut's central lumen, and SJs remodel to circumscribe the cell (Stage 4). Eventually, the concave  
902 lumenal-apical surface everts to form the convex apical surface that characterizes mature  
903 enterocytes. Enteroblast/pre-enterocyte SJs shown in orange, mature enterocyte SJs in red, and  
904 apical surface in light blue. Full genotypes in Table 1.

905

906 **Video 3 (related to Figure 3A). 360° confocal reconstruction of a Stage 3 pre-enterocyte**  
907 **shows that the PAAC's apical membrane is distinct from the gut's lumenal-apical surface.**

908 Video shows reconstructed 360° view of a Stage 3 pre-enterocyte, labeled by Su(H)-driven  
909  $\beta$ -galactosidase. The pre-enterocyte is surrounded by two mature enterocytes, and a pair of small,  
910 basal progenitor cells is visible between the pre-enterocyte and one of the mature enterocytes. The  
911 apical marker Moesin::GFP outlines the lumenal-apical surface of the mature enterocytes, the PAAC  
912 in the pre-enterocyte, and the entire cortex of the progenitor cells. The SJ protein Tetraspanin2A  
913 forms a convex web that covers the apex of the pre-enterocyte. Nuclei are labelled with DAPI. Full  
914 genotype in Table 1.

915



916 **Figure 4**

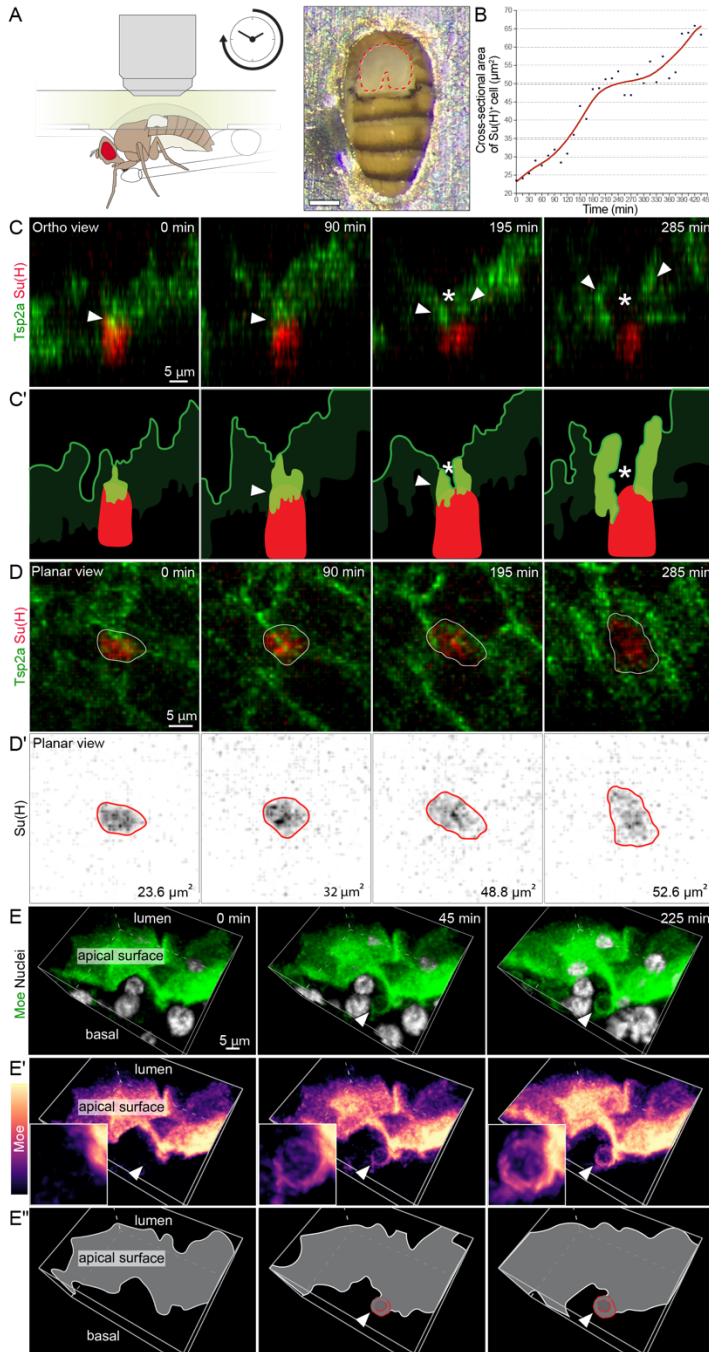

917

918 **Figure 4: *In vivo* live imaging of SJ and PAAC dynamics supports the four-stage model of**  
 919 **integration.**

920 (A) Continuous time-lapse imaging of midguts in live, feeding *Drosophila* was performed  
 921 through a window in the dorsal cuticle. Adapted from Martin, 2018.

922 (B) Cross-sectional area of the *Su(H)-mCherry*<sup>+</sup> cell shown in Panels C and D and in Video 4.  
 923 The increase in area implies that this cell is actively differentiating from enteroblast to enterocyte.

924 (C-D) Live dynamics of SJ during enteroblast-enterocyte differentiation. Still frames are from  
 925 a 7.25 h volumetric movie (Video 4) of a midgut expressing *GS5961-tsp2A::GFP* and *Su(H)-mCherry*.  
 926 The cell analyzed in Panel B is shown in ortho view (C; apical at top) with corresponding line

927 drawings (C'). In ortho view, arrowheads point to the SJ associated with this cell and asterisk  
928 denotes estimated location of putative PAAC. The planar view is shown in (D); panels are  
929 projections of serial confocal images. Numbers in the lower right corner of panels in D' are cross-  
930 sectional areas of the cell at the given time points. SJ morphogenesis over time is visible in the ortho  
931 view: Between 0 min and 90 min, the SJ broadens over the cell's apex. At 195 min, a hollow space  
932 (asterisk in C) develops along the SJ's apical-basal axis. Between 195 and 225 min, the hollow space  
933 widens; both the hollow space and its surrounding SJ elongate along the lateral edges of the now-  
934 larger cell.

935 (E) Live imaging of PAAC development. Still frames from a 3.75 h volumetric movie (Video  
936 5) of midgut expressing the apical marker *moesin::GFP* (green in E; magma LUT in E') and the nuclear  
937 marker *ubi-his2av::RFP* (grayscale in E). Corresponding line drawings are in E''. Arrowhead in E'  
938 points to the area of PAAC formation, which is also shown as a close-up in the inset. At 0 min, the  
939 lumenal-apical surface appears as a lumpy blanket overlying the gut cell nuclei; no PAAC is visible.  
940 By 45 min, a putative PAAC has formed at the basal side of the lumenal-apical surface. By 225 min,  
941 the PAAC has become deeper and brighter. Insets in E' show close-up views of the developing  
942 PAAC. Full genotypes for all panels in Table.

943

#### 944 **Video 4 (related to Figure 4C and 4D). 7.5-hour continuous time-lapse of SJ dynamics** 945 **during enteroblast-enterocyte differentiation.**

946 Windowmount imaging of midgut expressing *GS5961-tsp2A::GFP* and *Su(H)-mCherry*. Planar  
947 (top) and ortho (bottom) views of the same tissue volume are shown. In ortho view, the dotted white  
948 line indicates the basal surface of the differentiating cell. Arrowhead points to SJs (*Tsp2A::GFP*)  
949 associated with the differentiating, *mCherry*<sup>+</sup> cell analyzed in Fig. 4B. Dynamics of the SJ in ortho  
950 view are consistent with the four-stage mechanism inferred from Fig. 3: Nascent contact (Stage 1),  
951 broadening and expansion over the cell apex (Stages 2-3), and central hollowing and lateral  
952 extension (Stage 4). Full genotype in Table 1.

953

#### 954 **Video 5 (related to Figure 4E). 3.75-hour continuous time-lapse movie of PAAC** 955 **development.**

956 Windowmount imaging of midgut expressing *moesin::GFP* and *ubi-his2av::RFP*. The  
957 *Moesin::GFP* channel (magma LUT) is shown without (left) and with (right) the *His2av::RFP* channel  
958 (grayscale). At 30 min, a faint *Moesin::GFP*-labelled structure (arrowhead) forms at the basal side of  
959 the gut's lumenal-apical surface. The concave shape of this structure is similar to PAACs in fixed  
960 samples (Fig. 3, Stage 3; Video 3). From 30-225 min, the putative PAAC deepens, and its GFP-  
961 labelled boundary brightens and thickens. Full genotype in Table 1.

962

963

964

Figure 5

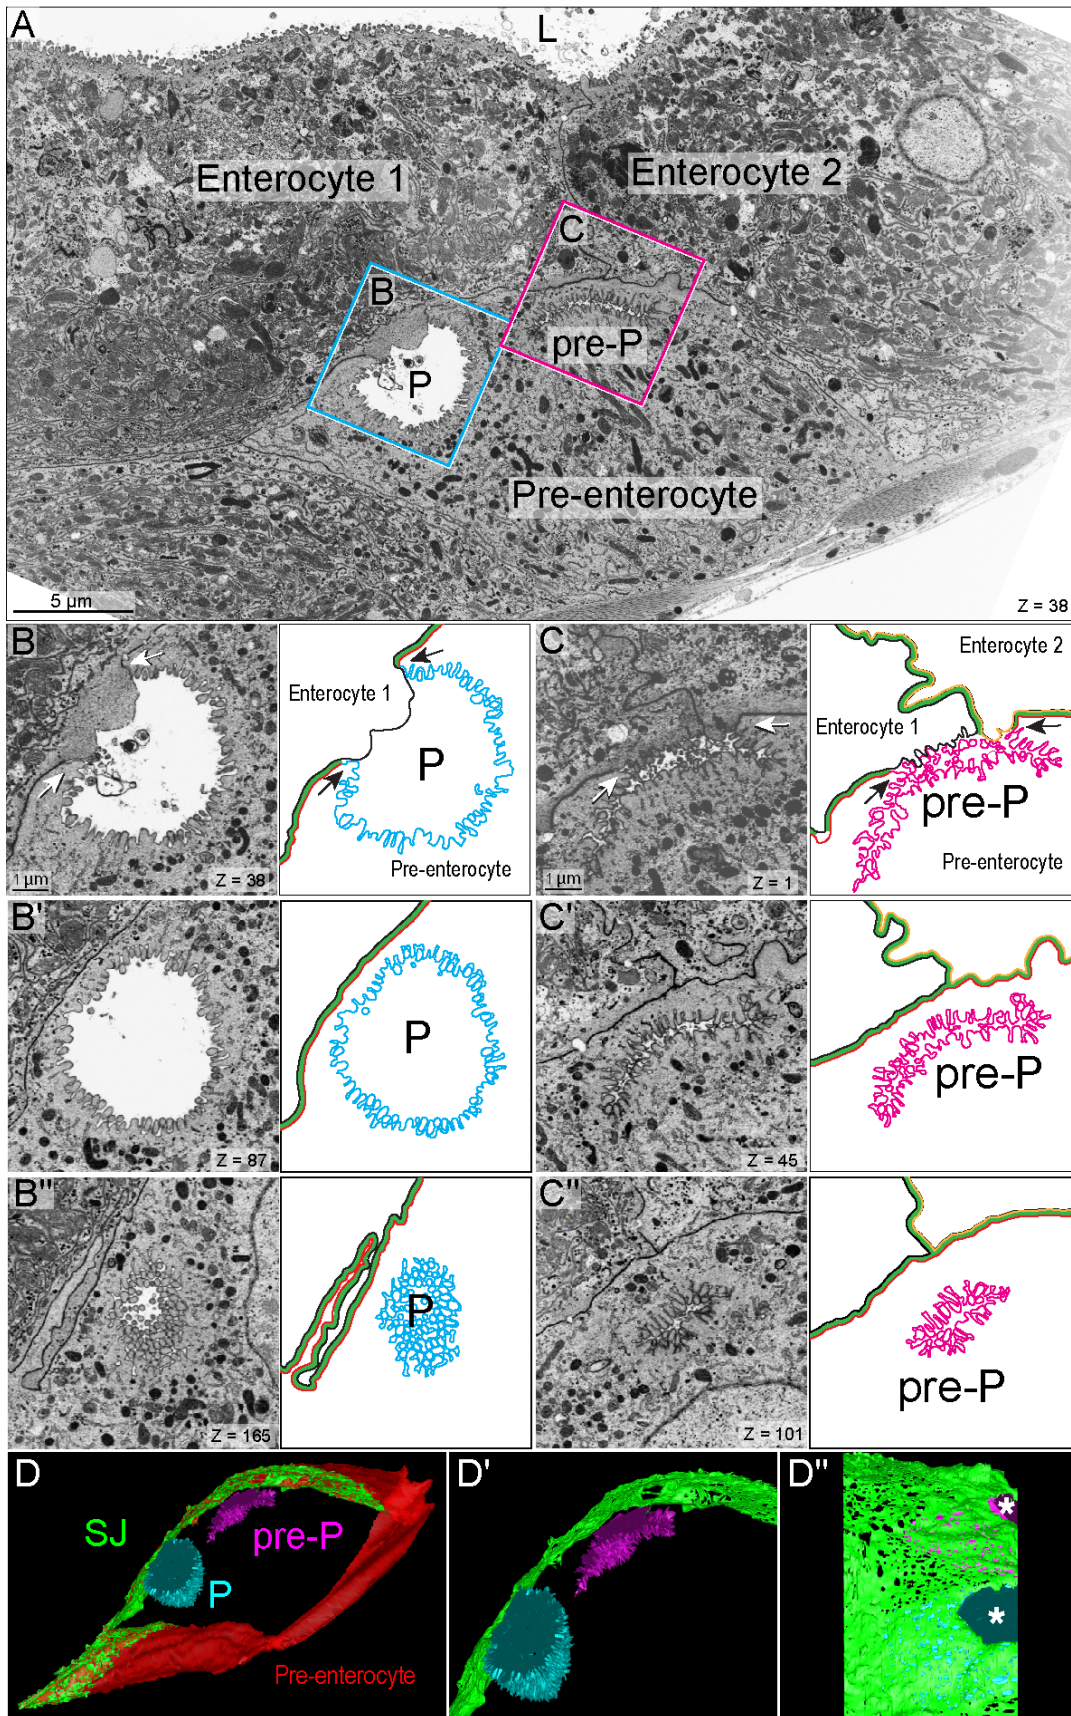

965

966 **Figure 5. PAACs are intercellular lumens with split apical-basolateral polarity.**

967 (A) One slice of a representative, 200-slice FIB-SEM tomographic series. Series captures two  
968 mature enterocytes that contact the gut's central lumen (L) and an underlying pre-enterocyte, which  
969 does not. An ellipsoid-shaped PAAC (P, cyan box) and an allantoid-shaped PAAC precursor (pre-P,  
970 magenta box) appear at the apex of the pre-enterocyte. See Figure S4.

971 (B) Close-up of the PAAC in cyan box in A. Three FIB-SEM sections are shown next to  
972 cartoon representations. P indicates the PAAC lumen. In cartoons, the apical membrane of the pre-  
973 enterocyte is cyan, the basolateral membrane of the pre-enterocyte is red, the basolateral plasma  
974 membrane of enterocyte 1 is black, and the SJ between the pre-enterocyte and enterocyte 1 is green.  
975 In B, a gap in the SJ reveals that the PAAC is an intercellular lumen between the apical pre-  
976 enterocyte membrane and the basolateral enterocyte membrane (split polarity). Arrows point to the  
977 three-way boundary between the pre-enterocyte apical membrane, the enterocyte basolateral  
978 membrane, and the pre-enterocyte basolateral membrane. In B' and B'', the deep cytoplasmic  
979 invagination of the pre-enterocyte apical membrane forms most of the PAAC's luminal volume.

980 (C) Close-up of the PAAC precursor in magenta box in A. pre-P indicates the PAAC  
981 precursor. In cartoons, the pre-enterocyte's apical membrane is magenta, the pre-enterocyte's  
982 basolateral membrane is red, the basolateral plasma membrane of enterocyte 1 is black, the  
983 basolateral membrane of enterocyte 2 is orange, and the SJ between the pre-enterocyte and  
984 enterocytes 1 and 2 is green. In C, a gap in the SJ reveals that the PAAC precursor is an intercellular  
985 lumen. Arrows point to two three-way boundaries between the pre-enterocyte apical membrane, the  
986 basolateral membrane of either enterocyte 1 or enterocyte 2, and the pre-enterocyte basolateral  
987 membrane. In C' and C'', the precursor's slender, allantoid-shaped lumen arises through  
988 invagination of the pre-enterocyte's convoluted apical membrane. In A-C, Z values in lower left of  
989 panels are slice numbers.

990 (D) Volumetric rendering of 200 FIB-SEM sections, including the section in A. Apical  
991 membranes of the pre-enterocyte are cyan (PAAC) and magenta (PAAC precursor), basolateral  
992 membrane of the pre-enterocyte is red, and SJ between the pre-enterocyte and mature enterocytes is  
993 in green. Zoomed-in panels show the PAAC, PAAC precursor, and SJ in a cutaway view (D') and a  
994 top-down view (D''). In D and D', the PAAC's ellipsoid shape and the precursor's allantoid shape  
995 are evident. In D'', asterisks mark holes in the SJ resulting from separation of pre-enterocyte and  
996 enterocyte plasma membranes during PAAC formation. (Enterocyte membranes not shown.) See  
997 Video 6. Full genotype in Table 1.

998

999 **Figure S4 (related to Figure 5A)**

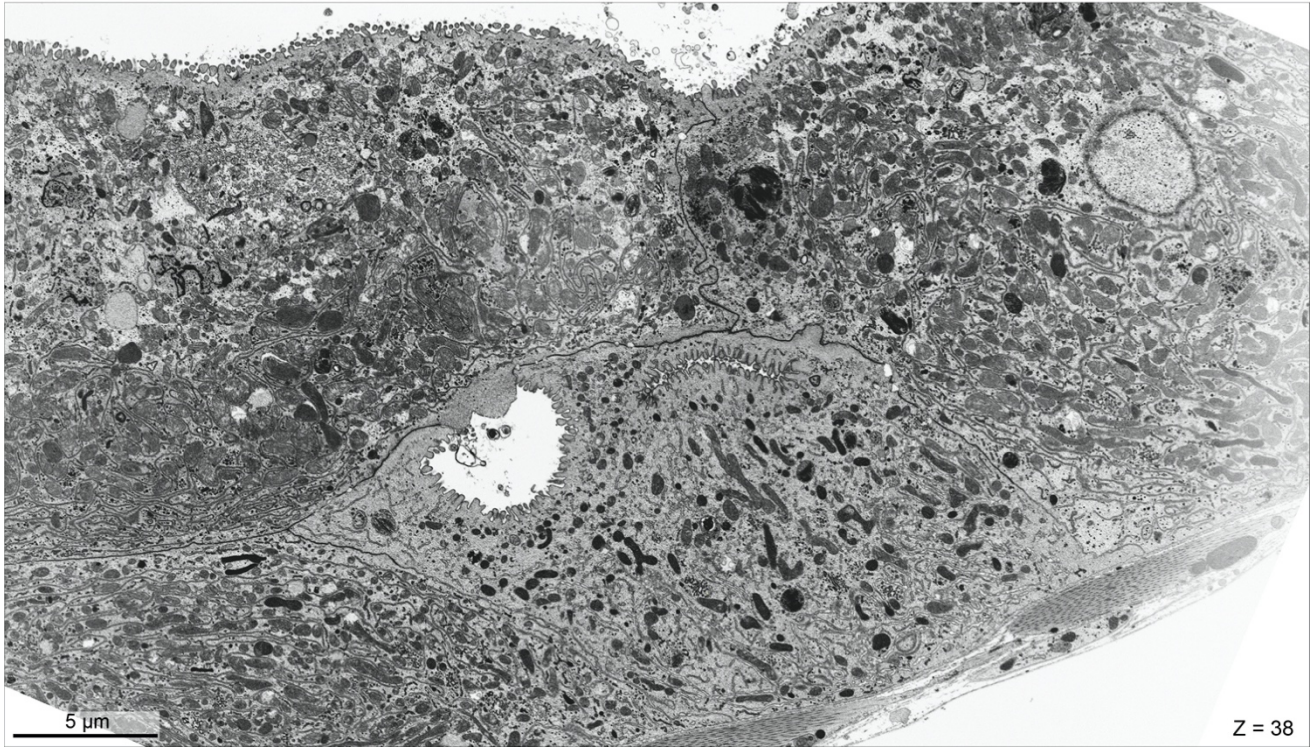

1000

1001 **Figure S4 (related to Figure 5A). High resolution view of FIB-SEM section shown in**  
1002 **Figure 4A.**

1003 40nm-thick sections were cut with a gallium ion beam at 2kV, 0.8 nA, 4.2mm working  
1004 distance, 5μs dwell time, 6144x4096 frame size. Pixel size 9.7nm. Full genotype in Table 1.

1005

1006 **Video 6 (related to Figure 5A-D). Three-dimensional ultrastructure of PAAC, PAAC**  
1007 **precursor, and their associated pre-enterocyte.**

1008 Tomographic reconstruction of 200 serial FIB-SEM images, including a cropped version of  
1009 the image shown in Figures 5A and S4. 360° rotation reveals the ellipsoid and allantoid shapes of the  
1010 PAAC and PAAC precursor, respectively, and also reveals holes in the SJ in which the pre-  
1011 enterocyte and enterocyte membranes have separated to form the intercellular lumens. Volume of  
1012 reconstruction: 40.2 μm × 23.9 μm × 8 μm. Slice thickness, 40 nm. Full genotype in Table 1.

1013

1014

1015 **Figure 6**

Moreno-Roman\_Fig 6

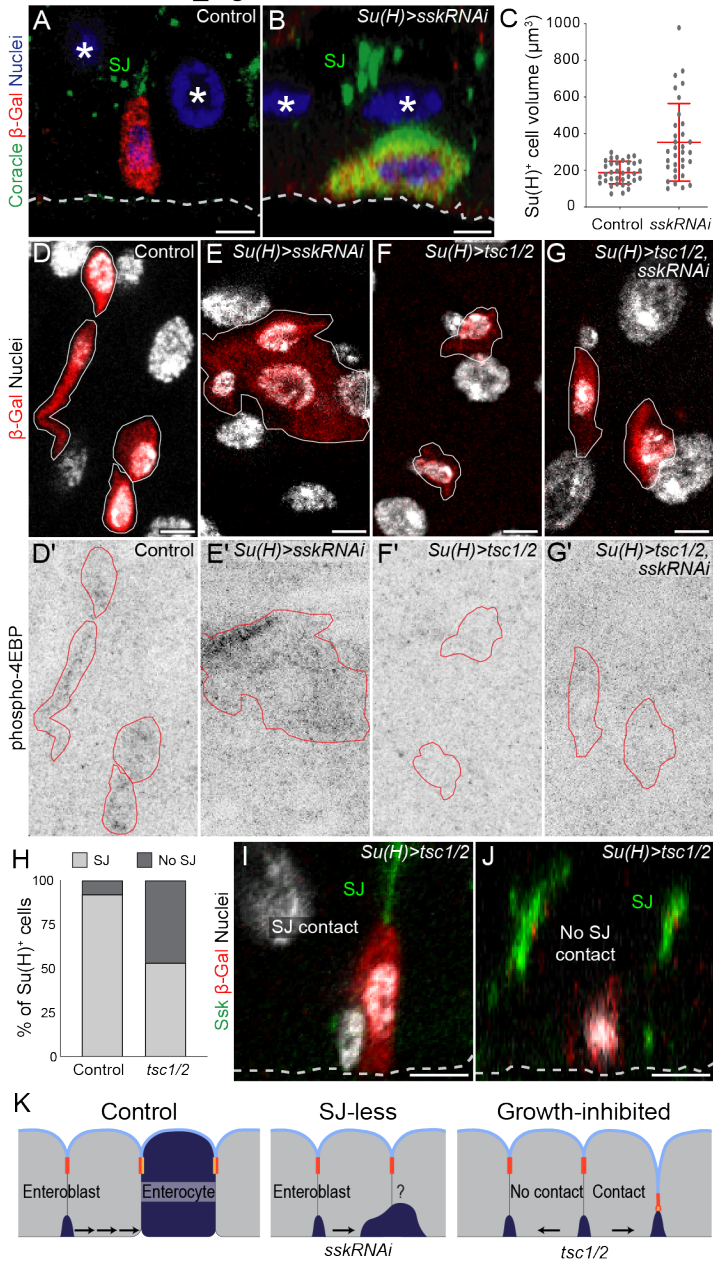

1016

1017 **Figure 6. Cells must form SJs and grow in order to integrate.**

1018 (A-C) Blocking SJ formation prevents integration but not growth. (A) Cross-sectional view of  
 1019 control *Su(H)<sup>ts</sup>* cell (red, *Su(H)-lacZ*). The cell's apex has formed contacts with the basal tip of the SJ  
 1020 (green, Coracle) between neighbor enterocytes. (B) Cross-sectional view of *Su(H)<sup>ts</sup>>sskRNAi*. The cell  
 1021 expresses *Su(H)-lacZ* (red) and high levels of Coracle (green), which localizes to the cytoplasm. It  
 1022 does not contact either enterocyte-enterocyte SJs or the gut lumen. (C) Measurements of cytoplasmic  
 1023 volumes show that *Su(H)<sup>ts</sup>>sskRNAi* cells become larger in size compared to control *Su(H)* cells.

1024 (D-G) Growth of *Su(H)<sup>ts</sup>>sskRNAi* cells requires Tor pathway activation. Planar views of all  
 1025 midgut cell nuclei (grayscale, DAPI) and *Su(H)-lacZ* (red) are shown above corresponding images of  
 1026 phospho-4EBP immunostain (D'-G', inverted grayscale). *Su(H)-lacZ*-labelled cells are in

1027 white (D-G) and red (D'-G'). Control *Su(H)* cells (D) and *Su(H)<sup>ts</sup>>sskRNAi* (E) cells are phospho-  
1028 4EBP<sup>+</sup> (D', E'). Tor-inhibited, *Su(H)<sup>ts</sup>>tsc1/2* (F) and *Su(H)<sup>ts</sup>>sskRNAi, tsc1/2* (G) are not (F', G').

1029 (H-J) Growth-inhibited enteroblasts arrest at initial stages of integration. The frequency with  
1030 which *Su(H)<sup>ts</sup>>tsc1/2* cells (*Su(H)-lacZ*, red) contact the gut SJ network (Ssk, green) is reduced to 53%  
1031 from the control frequency of 92% (H). Both *Su(H)<sup>ts</sup>>tsc1/2* cells that contact SJs (I) and those that do  
1032 not (J) fail to reach the gut's luminal surface. N=3 control midguts (214 enteroblasts) and 3  
1033 *Su(H)>tsc1/2* midguts (146 enteroblasts). All scale bars, 5  $\mu$ m. Full genotypes in Table 1.

1034 (K) Cartoon summary: (Left) Control. Integration requires both cell growth and SJ formation.  
1035 (Middle) Blocking SJ formation prevents integration but does not halt growth. (Right) Growth  
1036 inhibition arrests cells in Stages 0-1 of integration.

1037

1038 **Figure S5**

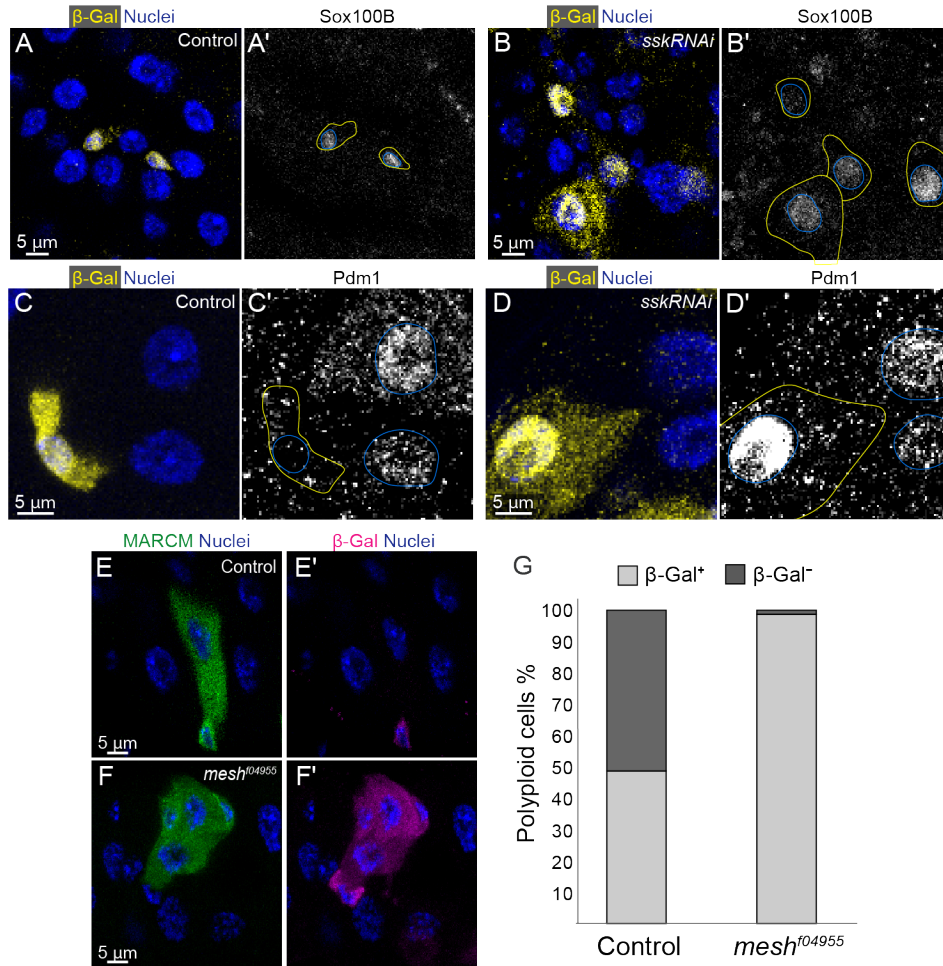

1039

1040 **Figure S5 (Related to Figure 6). SJ-less cells exhibit an abnormal mix of enteroblast and**  
 1041 **enterocyte features.**

1042 (A-B) *Su(H)*<sup>ts</sup>>*sskRNAi* cells express the stem cell / enteroblast transcription factor Sox100B.  
 1043 Planar views of control *Su(H)* cells (A) and *Su(H)*<sup>ts</sup>>*sskRNAi* cells. (B). Left panels: Yellow, *Su(H)-lacZ*  
 1044 ( $\beta$ -gal immunostain); blue, nuclei (DAPI). Right panels: Sox100B immunostain. Yellow and blue  
 1045 outlines in right panels indicate *Su(H)-lacZ*<sup>+</sup> cells and their nuclei, respectively.

1046 (C-D) *Su(H)*<sup>ts</sup>>*sskRNAi* cells express the enterocyte-specific transcription factor Pdm1.  
 1047 Control *Su(H)* cells (C) and *Su(H)*<sup>ts</sup>>*sskRNAi* cells are shown. Left panels: Yellow, *Su(H)-lacZ* ( $\beta$ -gal  
 1048 immunostain); blue, nuclei (DAPI). Right panels: Pdm1 immunostain. Yellow and blue outlines in  
 1049 right panels indicate *Su(H)-lacZ*<sup>+</sup> cells and their nuclei, respectively.

1050 (E-G) *Su(H)-lacZ* expression in stem cell (MARCM) clones that are either control (E) or *mesh*-  
 1051 null (*mesh*<sup>04955</sup>) (E). 4-day clones are labelled with GFP (green).  $\beta$ -gal immunostain (red) identifies  
 1052 *Su(H)-lacZ*-expressing cells. Nuclei are stained with DAPI (blue). In control clones, 52% of polyploid  
 1053 cells have lost  $\beta$ -Gal staining (n=39 polyploid cells from 133 clones, N=3 midguts), implying that  
 1054 terminal differentiation of polyploid cells to enterocyte fate is complete. In *mesh*-null clones, only  
 1055 1.1% of cells has lost  $\beta$ -gal staining, implying that nearly all cells, despite being polyploid, have not  
 1056 completed terminal differentiation (n=89 polyploid cells from 149 clones, N=3 midguts). All scale  
 1057 bars, 5  $\mu$ m. Full genotypes in Table 1.

1058



1059

## Figure 7

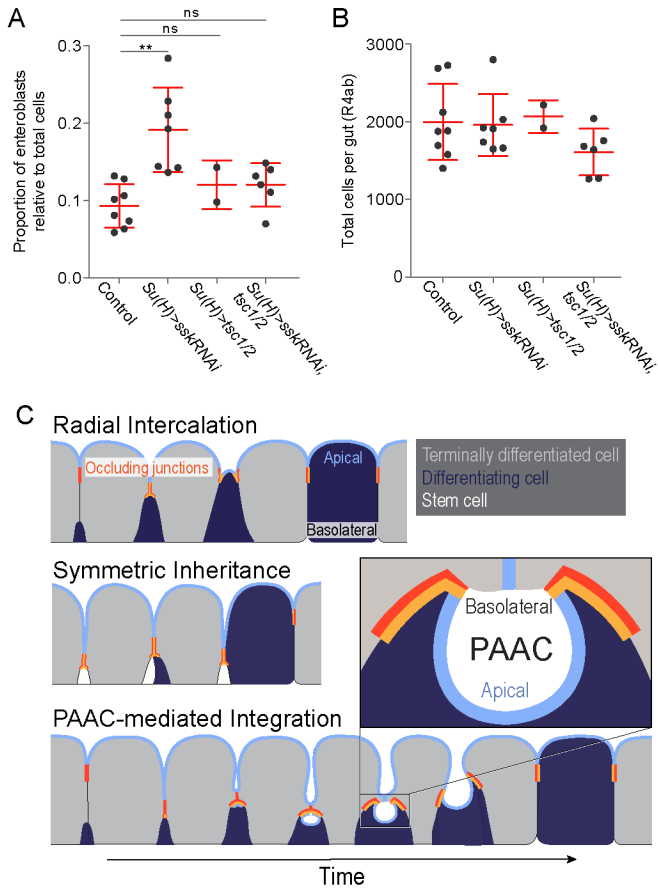

1060

### Figure 7. Impact of blocked midgut cell integration on organ-scale cell equilibrium.

1061 (A) Proportion of  $Su(H)^+$  cells in midguts with blocked cell integration. Plots show the  
 1062 percentage of  $Su(H)\text{-}lacZ^+$  cells relative to total cells in the R4ab region of midguts with the indicated  
 1063 genotypes. Cell integration was blocked by inhibiting either new SJ formation ( $Su(H)^{ts}>sskRNAi$ ),  
 1064 cell growth ( $Su(H)^{ts}>tsc1/2$ ), or both ( $Su(H)^{ts}>sskRNAi, tsc1/2$ ) between days 4-8 of adult life. Each  
 1065 data point represents one midgut. Red lines show Means  $\pm$  S.D for each condition:  $Su(H)$  control –  
 1066  $0.09 \pm 0.03$  cells;  $Su(H)^{ts}>sskRNAi$  –  $0.19 \pm 0.05$ ;  $Su(H)^{ts}>tsc1/2$  –  $0.12 \pm 0.032$  cells;  $Su(H)^{ts}>sskRNAi,$   
 1067  $tsc1/2$  –  $0.12 \pm 0.028$  cells.  
 1068

1069 (B) Total numbers of midgut cells remain constant when cell integration is blocked. Plots  
 1070 show total counts of DAPI-labeled nuclei in the R4ab regions of midguts analyzed in Panel A. Each  
 1071 data point represents one midgut. Red lines show Means  $\pm$  S.D for each condition:  $Su(H)$  control –  
 1072  $1997 \pm 489$  cells;  $Su(H)^{ts}>sskRNAi$  –  $1960 \pm 398$ ;  $Su(H)^{ts}>tsc1/2$  –  $2067 \pm 210$  cells;  $Su(H)^{ts}>sskRNAi,$   
 1073  $tsc1/2$  –  $1611 \pm 299$  cells.

1074 (C) Three mechanisms to incorporate stem cell progeny into a mature epithelium. Only  
 1075 PAAC-mediated integration enables the differentiating cell to form new barrier structures (apical  
 1076 plasma membrane and occluding junctions) while still sheltered by the mature occluding junction  
 1077 barrier.

1078

1079 **TABLE 1 – Genotypes in Figure Panels**

| FIGURE     | GENOTYPE                                                                                                                                                                                                                                                                                                                                                                                                 |
|------------|----------------------------------------------------------------------------------------------------------------------------------------------------------------------------------------------------------------------------------------------------------------------------------------------------------------------------------------------------------------------------------------------------------|
| Fig 1 A    | <i>MduA142GFP/ Su(H)-lacZ</i> (X Chr)                                                                                                                                                                                                                                                                                                                                                                    |
| Fig 1 B-H  | <i>esg-Gal4, UAS-His2b::CFP; Su(H)-GFP::nls</i>                                                                                                                                                                                                                                                                                                                                                          |
| Fig 2      | <i>esg-Gal4, UAS-His2b::CFP; Su(H)-GFP::nls, ubiP-His2av::mRFP</i>                                                                                                                                                                                                                                                                                                                                       |
| Fig 3 A    | <i>Su(H)-lacZ/ +; +; ubiP-His2AV::mRFP, Sqh-Moesin::GFP/ +</i>                                                                                                                                                                                                                                                                                                                                           |
| Fig 3 B    | <i>MduA142GFP/ Su(H)-lacZ</i> (X Chr)<br><i>MduA142GFP/ +; Su(H)-Gal4/ +; Su(H)-lacZ, tubP-Gal80ts/ +</i>                                                                                                                                                                                                                                                                                                |
| Fig 3 C    | <i>Su(H)-lacZ/ +; +; ubiP-His2AV::mRFP, Sqh-Moesin::GFP/ +</i>                                                                                                                                                                                                                                                                                                                                           |
| Fig 4 B-D  | <i>UAS-Tsp2aGFP/ +; Su(H)-mCherry/ 5966GS-Gal4; +</i>                                                                                                                                                                                                                                                                                                                                                    |
| Fig 4 E    | <i>ubiP-His2AV::mRFP, sqhP-Moe::GFP</i>                                                                                                                                                                                                                                                                                                                                                                  |
| Fig 5      | <i>esg-Gal4, UAS-His2b::CFP; Su(H)-GFP::nls, ubiP-His2av::mRFP</i>                                                                                                                                                                                                                                                                                                                                       |
| Fig 6 A    | <i>Su(H)-Gal4, UAS-mCD8::GFP/ +; Su(H)-lacZ, tubP-Gal80ts/ +</i>                                                                                                                                                                                                                                                                                                                                         |
| Fig 6 B    | <i>Su(H)-Gal4, UAS-mCD8::GFP/ UAS-sskRNAi; Su(H)-lacZ, tubP-Gal80ts/ +</i>                                                                                                                                                                                                                                                                                                                               |
| Fig 6 C    | Same as Fig 6 A&B                                                                                                                                                                                                                                                                                                                                                                                        |
| Fig 6 D    | <i>Su(H)-Gal4, UAS-mCD8::GFP/ +; Su(H)-lacZ, tubP-Gal80ts/ +</i>                                                                                                                                                                                                                                                                                                                                         |
| Fig 6 E    | <i>Su(H)-Gal4, UAS-mCD8::GFP/ UAS-sskRNAi; Su(H)-lacZ, tubP-Gal80ts/ +</i>                                                                                                                                                                                                                                                                                                                               |
| Fig 6 F    | <i>Su(H)-Gal4, UAS-mCD8::GFP/ +; Su(H)-lacZ, tubP-Gal80ts/ UAS-Tsc1/2</i>                                                                                                                                                                                                                                                                                                                                |
| Fig 6 G    | <i>Su(H)-Gal4, UAS-mCD8::GFP/ UAS-sskRNAi; Su(H)-lacZ, tubP-Gal80ts/ UAS-Tsc1/2</i>                                                                                                                                                                                                                                                                                                                      |
| Fig 6 H    | <b>Ctrl:</b> <i>esg-Gal4, UAS-His2b::CFP; Su(H)-GFP::nls</i><br><b>Su(H)&gt; tsc1/2:</b> <i>Su(H)-Gal4, UAS-mCD8::GFP/ +; Su(H)-lacZ, tubP-Gal80ts/ UAS-Tsc1/2</i>                                                                                                                                                                                                                                       |
| Fig 6 I    | <i>Su(H)-Gal4, UAS-mCD8::GFP/ +; Su(H)-lacZ, tubP-Gal80ts/ UAS-Tsc1/2</i>                                                                                                                                                                                                                                                                                                                                |
| Fig 6 J    | <i>Su(H)-Gal4, UAS-mCD8::GFP/ +; Su(H)-lacZ, tubP-Gal80ts/ UAS-Tsc1/2</i>                                                                                                                                                                                                                                                                                                                                |
| Fig 7 A    | <b>Ctrl:</b> <i>Su(H)-Gal4, UAS-mCD8::GFP/ +; Su(H)-lacZ, tubP-Gal80ts/ +</i><br><b>Su(H)&gt; sskRNAi:</b> <i>Su(H)-Gal4, UAS-mCD8::GFP/ UAS-sskRNAi; Su(H)-lacZ, tubP-Gal80ts/ +</i><br><b>Su(H)&gt; tsc1/2:</b> <i>Su(H)-Gal4, UAS-mCD8::GFP/ +; Su(H)-lacZ, tubP-Gal80ts/ UAS-Tsc1/2</i><br><b>Su(H)&gt; tsc1/2, sskRNAi:</b> <i>Su(H)-Gal4, UAS-sskRNAi/ +; Su(H)-lacZ, tubP-Gal80ts/ UAS-Tsc1/2</i> |
| Fig 7 B    | Same as Fig 7 A                                                                                                                                                                                                                                                                                                                                                                                          |
| Fig 7 C    | Same as Fig 7 A                                                                                                                                                                                                                                                                                                                                                                                          |
| Fig S1     | <i>esg-Gal4, UAS-His2b::CFP; Su(H)-GFP::nls, ubiP-His2av::mRFP</i>                                                                                                                                                                                                                                                                                                                                       |
| Fig S2 B&C | <i>MduA142GFP</i> (X Chr)                                                                                                                                                                                                                                                                                                                                                                                |
| Fig S3     | <i>Su(H)-lacZ/ +; +; ubiP-His2AV::mRFP, Sqh-Moe::GFP/ +</i>                                                                                                                                                                                                                                                                                                                                              |
| Fig S4     | <i>esg-Gal4, UAS-His2b::CFP; Su(H)-GFP::nls, ubiP-His2av::mRFP</i>                                                                                                                                                                                                                                                                                                                                       |
| Fig S5 A   | <i>Su(H)-Gal4, UAS-mCD8::GFP/ +; Su(H)-lacZ, tubP-Gal80ts/ +</i>                                                                                                                                                                                                                                                                                                                                         |
| Fig S5 B   | <i>Su(H)-Gal4, UAS-mCD8::GFP/ UAS-sskRNAi; Su(H)-lacZ, tubP-Gal80ts/ +</i>                                                                                                                                                                                                                                                                                                                               |
| Fig S5 C   | <i>Su(H)-Gal4, UAS-mCD8::GFP/ +; Su(H)-lacZ, tubP-Gal80ts/ +</i>                                                                                                                                                                                                                                                                                                                                         |
| Fig S5 D   | <i>Su(H)-Gal4, UAS-mCD8::GFP/ UAS-sskRNAi; Su(H)-lacZ, tubP-Gal80ts/ +</i>                                                                                                                                                                                                                                                                                                                               |
| Fig S5 E   | <i>w, UAS-mCD8::GFP, hsf1p<sup>122</sup>/ Su(H)-lacZ; tubP-Gal4/ +; FRT82B/ FRT82B, tubP-Gal80</i>                                                                                                                                                                                                                                                                                                       |
| Fig S5 F   | <i>w, UAS-mCD8::GFP, hsf1p<sup>122</sup>/ Su(H)-lacZ; tubP-Gal4/ +; mesh<sup>f04955</sup>/ FRT82B, tubP-Gal80</i>                                                                                                                                                                                                                                                                                        |
| Fig S5 G   | Same as Fig S5 E&F                                                                                                                                                                                                                                                                                                                                                                                       |

1080

1081

1082

**TABLE 2 – Reagents and Resources**

| REAGENT or RESOURCE                                  | SOURCE                    | IDENTIFIER                          |
|------------------------------------------------------|---------------------------|-------------------------------------|
| <b>Antibodies</b>                                    |                           |                                     |
| Mouse anti-Armadillo                                 | DSHB                      | N2 7A1; RRID: AB_528089             |
| Mouse anti-Coracle                                   | DSHB                      | C615.16; RRID: AB_1161644           |
| Mouse anti- $\beta$ -galactosidase                   | Promega                   | Z3781; RRID: AB_430877              |
| Donkey anti-mouse Alexa Fluor 647                    | Invitrogen                | A-31571; RRID: AB_162542            |
| Donkey anti-rabbit Alexa Fluor 555                   | Invitrogen                | A-31572; RRID: AB_162543            |
| Goat anti-Chicken Alexa Fluor 488                    | Invitrogen                | A-11039; RRID: AB_2534096           |
| Goat anti-Rabbit Alexa Fluor 405                     | Thermo Fisher             | RRID: AB_221605                     |
| GFP Polyclonal Antibody, Alexa Fluor 488             | Thermo Fisher             | A-21311; RRID: AB_221477            |
| Goat anti-Mouse Alexa Fluor 405                      | Thermo Fisher             | A-31553; RRID: AB_221604            |
| Goat anti-Mouse Alexa Fluor 647                      | Thermo Fisher             | A-21240; RRID: AB_2535809           |
| Goat anti-Mouse Alexa Fluor 555                      | Thermo Fisher             | A-21137; RRID: AB_2535776           |
| Goat anti-Rabbit Alexa Fluor 647                     | Thermo Fisher             | A-21244; RRID: AB_2535812           |
| Rabbit anti-Phospho4EBP1                             | Cell Signaling Technology | RRID: AB_560835                     |
| Rabbit anti-Pdm1                                     | Yang lab                  | N/A                                 |
| Rabbit anti-Snakeskin                                | Furuse lab                | N/A                                 |
| Rabbit anti-Tetraspanin2A                            | Furuse lab                | N/A                                 |
| Rabbit anti-Sox100B                                  | Russell lab               | N/A                                 |
| Rabbit anti-Karst                                    | Thomas lab                | N/A                                 |
| <b>Chemicals, Peptides, and Recombinant Proteins</b> |                           |                                     |
| Rhodamine Phalloidin                                 | Invitrogen                | R415; CAS Number 219920-04-4        |
| RU486                                                | Sigma-Aldrich             | M8046-100MG; CAS Number 84371-65-3  |
| DAPI                                                 | Thermo Fisher             | RRID: AB_2629482                    |
| Prolong Gold antifade                                | Thermo Fisher             | P10144                              |
| Isradipine                                           | Millipore Sigma           | I6658; CAS Number 75695-93-1        |
| <b>Experimental Models: Organisms/Strains</b>        |                           |                                     |
| <i>Drosophila: mesh<sup>D4955</sup></i>              | BDSC                      | 18826; FLYB: FBti0042412            |
| <i>Drosophila: SqhP-Moesin::GFP</i>                  | BDSC                      | 59023; FLYB: FBti0016051            |
| <i>Drosophila: Su(H)-Gal4</i>                        | BDSC                      | 93377; FLYB: FBti0204714            |
| <i>Drosophila: ubiP-His2av::mRFP</i>                 | BDSC                      | FLYB: FBti0077846; RRID: BDSC 23650 |
| <i>Drosophila: Su(H)-lacZ (3<sup>rd</sup> Chr)</i>   | BDSC                      | 83352; FLYB: FBtp0014034            |
| <i>Drosophila: tubP-Gal80ts</i>                      | BDSC                      | 7017; FLYB: FBti0027797             |
| <i>Drosophila: UAS-SskRNAi</i>                       | VDRC                      | 105193; PMID: 22328496              |
| <i>Drosophila: esg-Gal4</i>                          | Kyoto DGGR                | 112304; FLYB: FBti0033872           |
| <i>Drosophila: UAS-His2b::CFP</i>                    | Yoshihiro Inoue lab       | PMID: 24850412                      |
| <i>Drosophila: FRT82B</i>                            | David Bilder lab          | FLYB: FBti0002074                   |
| <i>Drosophila: UAS-mCD8GFP</i>                       | David Bilder lab          | FLYB: FBtp0002652                   |
| <i>Drosophila: 5966GS-Gal4</i>                       | Henri Jasper lab          | FLYB: FBti0150384                   |
| <i>Drosophila: UAS-Tsc1/2</i>                        | Nicolas Tapon lab         | PMID: 20573703                      |
| <i>Drosophila: Su(H)-mCherry</i>                     | Allison Bardin lab        | N/A                                 |
| <i>Drosophila: Su(H)-lacZ (X Chr)</i>                | Sarah Siegrist lab        | N/A                                 |
| <i>Drosophila: MduA142GFP</i>                        | Nicolas Buchon lab        | N/A                                 |
| <i>Drosophila: UAS-Tsp2aGFP</i>                      | Norbert Perrimon lab      | N/A                                 |
| <i>Drosophila: Su(H)-GFP::nls</i>                    | Joaquin de Navascués lab  | PMID: 22522699                      |

(Continued on next page)

1083

*Continued*

| REAGENT or RESOURCE                                        | SOURCE                                                                          | IDENTIFIER      |
|------------------------------------------------------------|---------------------------------------------------------------------------------|-----------------|
| <b>Oligonucleotides</b>                                    |                                                                                 |                 |
| <i>traF</i> _U primer: CGAGAAAGAGAA-TACCATGGGCGATCAA       | N/A                                                                             | N/A             |
| <i>traF</i> _L primer: CCTGTGGTGGCACTTGCACATAGTA           | N/A                                                                             | N/A             |
| <i>GFP</i> _62U primer: CGACGTAAAC-GGCCACAAGTTCA           | N/A                                                                             | N/A             |
| <i>GFP</i> _495L primer: CCTCGATGTT-GTGGCGGATCTTGAA        | N/A                                                                             | N/A             |
| 3'Pout_U primer: CATA-TCGCTGTCTCACTCAGACTCAA               | N/A                                                                             | N/A             |
| <i>Mdu3</i> 'conf_L2 primer: CGCGCCACTATGTGCCGCAAAA        | N/A                                                                             | N/A             |
| <i>Mdu3</i> 'conf_L1 primer: GCCAAAAGGCATAAAAAACAGCTAA     | N/A                                                                             | N/A             |
| <i>Mdu5</i> 'conf_U1 primer: GTGTCAATGGCCCAGAGACCA         | N/A                                                                             | N/A             |
| <i>Mdu5</i> 'conf_U2 primer: GAAATGGGTATGAACTG-CAAATCAGTA  | N/A                                                                             | N/A             |
| <i>Mdu5</i> 'conf_U3 primer: GAACAGGCAACAGATGCCCAGATAATACA | N/A                                                                             | N/A             |
| 5'Pout_L1 primer: CTTCGGTAAGCTTCGGCTATCGA                  | N/A                                                                             | N/A             |
| 5'Pout_L2 primer: CTCAACAAGCAAACGTGCACTGAA                 | N/A                                                                             | N/A             |
| <b>Software and Algorithms</b>                             |                                                                                 |                 |
| Fiji                                                       | <a href="https://fiji.sc">https://fiji.sc</a>                                   | RRID:SCR_002285 |
| Bitplane Imaris 8                                          | Bitplane                                                                        | RRID:SCR_007370 |
| IMOD                                                       | <a href="https://bio3d.colorado.edu/imod/">https://bio3d.colorado.edu/imod/</a> | RRID:SCR_003297 |
| Graphpad Prism 7                                           | GraphPad Software                                                               | RRID:SCR_002798 |

1084

1085 **REFERENCES**

1086 Akagi, K., Wilson, K.A., Katewa, S.D., Ortega, M., Simons, J., Hilsabeck, T.A., Kapuria, S., Sharma,  
1087 A., Jasper, H., and Kapahi, P. (2018). Dietary restriction improves intestinal cellular fitness to en-  
1088 hance gut barrier function and lifespan in *D. melanogaster*. *PLOS Genetics* *14*, e1007777.

1089 Alvers, A.L., Ryan, S., Scherz, P.J., Huisken, J., and Bagnat, M. (2014). Single continuous lumen  
1090 formation in the zebrafish gut is mediated by smoothed-dependent tissue remodeling. *Development*  
1091 *141*, 1110–1119.

1092 Amcheslavsky, A., Ito, N., Jiang, J., and Ip, Y.T. (2011). Tuberos sclerosis complex and Myc coor-  
1093 dinate the growth and division of *Drosophila* intestinal stem cells. *The Journal of Cell Biology* *193*,  
1094 695–710.

1095 Arganda-Carreras, I., Sorzano, C.O.S., Marabini, R., Carazo, J.M., Ortiz-de-Solorzano, C., and Ky-  
1096 bic, J. (2006). Consistent and elastic registration of histological sections using vector-spline regulari-  
1097 zation. In *Computer Vision Approaches to Medical Image Analysis*, (Berlin, Heidelberg: Springer,  
1098 Berlin, Heidelberg), pp. 85–95.

1099 Bachmair, A., Finley, D., and Varshavsky, A. (1986). In vivo half-life of a protein is a function of its  
1100 amino-terminal residue. *Science* *234*, 179–186.

- 1101 Bagnat, M., Cheung, I.D., Mostov, K.E., and Stainier, D.Y.R. (2007). Genetic control of single lumen  
1102 formation in the zebrafish gut. *Nature Cell Biology* 9, 954–960.
- 1103 Bardin, A.J., Perdigoto, C.N., Southall, T.D., Brand, A.H., and Schweisguth, F. (2010). Transcrip-  
1104 tional control of stem cell maintenance in the *Drosophila* intestine. *Development* 137, 705–714.
- 1105 Baumann, O. (2001). Posterior midgut epithelial cells differ in their organization of the membrane  
1106 skeleton from other *drosophila* epithelia. *Exp Cell Res* 270, 176–187.
- 1107 Blasky, A.J., Mangan, A., and Prekeris, R. (2015). Polarized Protein Transport and Lumen Formation  
1108 During Epithelial Tissue Morphogenesis. *Annu. Rev. Cell Dev. Biol.* 31, 575–591.
- 1109 Bobinnec, Y., Marcaillou, C., Morin, X., and Debec, A. (2003). Dynamics of the endoplasmic reticu-  
1110 lum during early development of *Drosophila melanogaster*. *Cell Motility* 54, 217–225.
- 1111 Bonfini, A., Dobson, A.J., Duneau, D., Revah, J., Liu, X., Houtz, P., and Buchon, N. (2021). Mul-  
1112 tiscala analysis reveals that diet-dependent midgut plasticity emerges from alterations in both stem  
1113 cell niche coupling and enterocyte size. *ELife* 10, e64125.
- 1114 Bryant, D.M., Datta, A., Rodríguez-Fraticelli, A.E., Peränen, J., Martín-Belmonte, F., and Mostov,  
1115 K.E. (2010). A molecular network for de novo generation of the apical surface and lumen. *Nat Cell*  
1116 *Biol* 12, 1035–1045.
- 1117 Buchon, N., Osman, D., David, F.P.A., Yu Fang, H., Boquete, J.-P., Deplancke, B., and Lemaitre, B.  
1118 (2013). Morphological and molecular characterization of adult midgut compartmentalization in *Dro-*  
1119 *sophila*. *Cell Rep* 3, 1725–1738.
- 1120 Burel, A., Lavault, M.-T., Chevalier, C., Gnaegi, H., Prigent, S., Mucciolo, A., Dutertre, S., Humbel,  
1121 B.M., Guillaudeux, T., and Kolotuev, I. (2018). A targeted 3D EM and correlative microscopy  
1122 method using SEM array tomography. *Development* 145.
- 1123 Campbell, K., Casanova, J., and Skaer, H. (2010). Mesenchymal-to-epithelial transition of intercalat-  
1124 ing cells in *Drosophila* renal tubules depends on polarity cues from epithelial neighbours. *Mech Dev*  
1125 127, 345–357.
- 1126 Chan, C.J., Costanzo, M., Ruiz-Herrero, T., Mönke, G., Petrie, R.J., Bergert, M., Diz-Muñoz, A., Ma-  
1127 hadevan, L., and Hiiragi, T. (2019). Hydraulic control of mammalian embryo size and cell fate. *Nat-*  
1128 *ure* 571, 112–116.
- 1129 Chen, J., Sayadian, A.-C., Lowe, N., Lovegrove, H.E., and St Johnston, D. (2018). An alternative  
1130 mode of epithelial polarity in the *Drosophila* midgut. *PLoS Biology* 16, e3000041.
- 1131 Chepko, G., and Dickson, R.B. (2003). Ultrastructure of the putative stem cell niche in rat mammary  
1132 epithelium. *Tissue and Cell* 35, 83–93.
- 1133 Chepko, G., and Smith, G.H. (1997). Three division-competent, structurally-distinct cell populations  
1134 contribute to murine mammary epithelial renewal. *Tissue and Cell* 29, 239–253.
- 1135 Choi, N.-H., Lucchetta, E., and Ohlstein, B. (2011). Nonautonomous regulation of *Drosophila* midgut  
1136 stem cell proliferation by the insulin-signaling pathway. *Proceedings of the National Academy of*  
1137 *Sciences* 108, 18702–18707.

- 1138 Cotsarelis, G., Cheng, S.-Z., Dong, G., Sun, T.-T., and Lavker, R.M. (1989). Existence of slow-cy-  
1139 cling limbal epithelial basal cells that can be preferentially stimulated to proliferate: Implications on  
1140 epithelial stem cells. *Cell* 57, 201–209.
- 1141 Daniel, E., Daudé, M., Kolotuev, I., Charish, K., Auld, V., and Le Borgne, R. (2018). Coordination of  
1142 Septate Junctions Assembly and Completion of Cytokinesis in Proliferative Epithelial Tissues. *Curr.*  
1143 *Biol.* 28, 1380-1391.e4.
- 1144 Dantoft, W., Davis, M.M., Lindvall, J.M., Tang, X., Uvell, H., Junell, A., Beskow, A., and Engström,  
1145 Y. (2013). The Oct1 homolog Nubbin is a repressor of NF-κB-dependent immune gene expression  
1146 that increases the tolerance to gut microbiota. *BMC Biology* 11, 99.
- 1147 Dasgupta, S., Gupta, K., Zhang, Y., Viasnoff, V., and Prost, J. (2018). Physics of lumen growth.  
1148 *PNAS* 115, E4751–E4757.
- 1149 Datta, A., Bryant, D.M., and Mostov, K.E. (2011). Molecular Regulation of Lumen Morphogenesis.  
1150 *Current Biology* 21, R126–R136.
- 1151 Deblandre, G.A., Wettstein, D.A., Koyano-Nakagawa, N., and Kintner, C. (1999). A two-step mecha-  
1152 nism generates the spacing pattern of the ciliated cells in the skin of *Xenopus* embryos. *Development*  
1153 126, 4715–4728.
- 1154 DeMaio, L., Tseng, W., Balverde, Z., Alvarez, J.R., Kim, K.-J., Kelley, D.G., Senior, R.M., Crandall,  
1155 E.D., and Borok, Z. (2009). Characterization of mouse alveolar epithelial cell monolayers. *American*  
1156 *Journal of Physiology-Lung Cellular and Molecular Physiology* 296, L1051–L1058.
- 1157 Dietzl, G., Chen, D., Schnorrer, F., Su, K.-C., Barinova, Y., Fellner, M., Gasser, B., Kinsey, K., Op-  
1158 pel, S., Scheiblaue, S., et al. (2007). A genome-wide transgenic RNAi library for conditional gene  
1159 inactivation in *Drosophila*. *Nature* 448, 151–156.
- 1160 Doupé, D.P., Marshall, O.J., Dayton, H., Brand, A.H., and Perrimon, N. (2018). *Drosophila* intestinal  
1161 stem and progenitor cells are major sources and regulators of homeostatic niche signals. *PNAS* 115,  
1162 12218–12223.
- 1163 Dumortier, J.G., Verge-Serandour, M.L., Tortorelli, A.F., Mielke, A., Plater, L. de, Turlier, H., and  
1164 Maître, J.-L. (2019). Hydraulic fracturing and active coarsening position the lumen of the mouse  
1165 blastocyst. *Science* 365, 465–468.
- 1166 Edwards, K.A., Demsky, M., Montague, R.A., Weymouth, N., and Kiehart, D.P. (1997). GFP-  
1167 Moesin Illuminates Actin Cytoskeleton Dynamics in Living Tissue and Demonstrates Cell Shape  
1168 Changes during Morphogenesis in *Drosophila*. *Developmental Biology* 191, 103–117.
- 1169 Evans, M.J., and Moller, P.C. (1991). Biology of Airway Basal Cells. *Experimental Lung Research*  
1170 17, 513–531.
- 1171 Fleming, E.S., Zajac, M., Moschenross, D.M., Montrose, D.C., Rosenberg, D.W., Cowan, A.E., and  
1172 Tirnauer, J.S. (2007). Planar spindle orientation and asymmetric cytokinesis in the mouse small intes-  
1173 tine. *J. Histochem. Cytochem.* 55, 1173–1180.
- 1174 Furuse, M., and Izumi, Y. (2017). Molecular dissection of smooth septate junctions: understanding  
1175 their roles in arthropod physiology. *Ann N Y Acad Sci* 1397, 17–24.

- 1176 Gilbert, T., and Rodriguez-Boulan, E. (1991). Induction of vacuolar apical compartments in the  
1177 Caco-2 intestinal epithelial cell line. *Journal of Cell Science* *100*, 451–458.
- 1178 Guillot, C., and Lecuit, T. (2013). Mechanics of epithelial tissue homeostasis and morphogenesis.  
1179 *Science* *340*, 1185–1189.
- 1180 He, L., Binari, R., Huang, J., Falo-Sanjuan, J., and Perrimon, N. (2019). In vivo study of gene expres-  
1181 sion with an enhanced dual-color fluorescent transcriptional timer. *ELife* *8*, e46181.
- 1182 Izumi, Y., Motoishi, M., Furuse, K., and Furuse, M. (2016). A tetraspanin regulates septate junction  
1183 formation in *Drosophila* midgut. *J Cell Sci* *129*, 1155–1164.
- 1184 Jiang, H., and Edgar, B.A. (2009). EGFR signaling regulates the proliferation of *Drosophila* adult  
1185 midgut progenitors. *Development* *136*, 483–493.
- 1186 Jin, Y., Patel, P.H., Kohlmaier, A., Pavlovic, B., Zhang, C., and Edgar, B.A. (2017). Intestinal stem  
1187 cell pool regulation in *Drosophila*. *Stem Cell Reports* *8*, 1479–1487.
- 1188 Jin, Z., Chen, J., Huang, H., Wang, J., Lv, J., Yu, M., Guo, X., Zhang, Y., Cai, T., and Xi, R. (2020).  
1189 The *Drosophila* Ortholog of Mammalian Transcription Factor Sox9 Regulates Intestinal Homeostasis  
1190 and Regeneration at an Appropriate Level. *Cell Reports* *31*.
- 1191 Jinguji, Y., and Ishikawa, H. (1992). Electron Microscopic Observations on the Maintenance of the  
1192 Tight Junction during Cell Division in the Epithelium of the Mouse Small Intestine. *Cell Struct Funct*  
1193 *17*, 27–37.
- 1194 Kapuria, S., Karpac, J., Biteau, B., Hwangbo, D., and Jasper, H. (2012). Notch-Mediated Suppression  
1195 of TSC2 Expression Regulates Cell Differentiation in the *Drosophila* Intestinal Stem Cell Lineage.  
1196 *PLoS Genetics* *8*, e1003045.
- 1197 Kizilyaprak, C., Longo, G., Daraspe, J., and Humbel, B.M. (2015). Investigation of resins suitable for  
1198 the preparation of biological sample for 3-D electron microscopy. *Journal of Structural Biology* *189*,  
1199 135–146.
- 1200 Kolotuev, I. (2014). Positional Correlative Anatomy of Invertebrate Model Organisms Increases Effi-  
1201 ciency of TEM Data Production. *Microscopy and Microanalysis* *20*, 1392–1403.
- 1202 Kolotuev, I., and Micheva, K.D. (2019). Can Correlative Microscopy Ever Be Easy? An Array To-  
1203 mography Viewpoint. In *Correlative Imaging*, (John Wiley & Sons, Ltd), pp. 81–98.
- 1204 Kolotuev, I., Schwab, Y., and Labouesse, M. (2010). A precise and rapid mapping protocol for cor-  
1205 relative light and electron microscopy of small invertebrate organisms. *Biology of the Cell* *102*, 121–  
1206 132.
- 1207 Korzelius, J., Naumann, S.K., Loza-Coll, M.A., Chan, J.S., Dutta, D., Oberheim, J., Gläßer, C.,  
1208 Southall, T.D., Brand, A.H., Jones, D.L., et al. (2014). Escargot maintains stemness and suppresses  
1209 differentiation in *Drosophila* intestinal stem cells. *EMBO J* *33*, 2967–2982.
- 1210 Koyama, L.A.J., Aranda-Díaz, A., Su, Y.-H., Balachandra, S., Martin, J.L., Ludington, W.B., Huang,  
1211 K.C., and O’Brien, L.E. (2020). Bellymount enables longitudinal, intravital imaging of abdominal  
1212 organs and the gut microbiota in adult *Drosophila*. *PLOS Biology* *18*, e3000567.

- 1213 Kremer, J.R., Mastronarde, D.N., and McIntosh, J.R. (1996). Computer Visualization of Three-Di-  
1214 mensional Image Data Using IMOD. *Journal of Structural Biology* 116, 71–76.
- 1215 Lattner, J., Leng, W., Knust, E., Brankatschk, M., and Flores-Benitez, D. (2019). Crumbs organizes  
1216 the transport machinery by regulating apical levels of PI(4,5)P2 in *Drosophila*. *ELife* 8, e50900.
- 1217 Leblond, C.P. (1981). The life history of cells in renewing systems. *Am. J. Anat.* 160, 114–158.
- 1218 Lee, T., and Luo, L. (1999). Mosaic analysis with a repressible cell marker for studies of gene func-  
1219 tion in neuronal morphogenesis. *Neuron* 22, 451–461.
- 1220 Lee, W.-C., Beebe, K., Sudmeier, L., and Micchelli, C.A. (2009). Adenomatous polyposis coli regu-  
1221 lates *Drosophila* intestinal stem cell proliferation. *Development* 136, 2255–2264.
- 1222 Lemaitre, B., and Miguel-Aliaga, I. (2013). The Digestive Tract of *Drosophila melanogaster*. *Annu*  
1223 *Rev Genet* 47, 377–404.
- 1224 Leung, C.T., Coulombe, P.A., and Reed, R.R. (2007). Contribution of olfactory neural stem cells to  
1225 tissue maintenance and regeneration. *Nat Neurosci* 10, 720–726.
- 1226 Liang, J., Balachandra, S., Ngo, S., and O’Brien, L.E. (2017). Feedback regulation of steady-state ep-  
1227 ithelial turnover and organ size. *Nature* 548, 588–591.
- 1228 Linden, S.K., Sutton, P., Karlsson, N.G., Korolik, V., and McGuckin, M.A. (2008). Mucins in the  
1229 mucosal barrier to infection. *Mucosal Immunology* 1, 183–197.
- 1230 Lowery, L.A., Rienzo, G.D., Gutzman, J.H., and Sive, H. (2009). Characterization and Classification  
1231 of Zebrafish Brain Morphology Mutants. *The Anatomical Record* 292, 94–106.
- 1232 Macara, I.G., Guyer, R., Richardson, G., Huo, Y., and Ahmed, S.M. (2014). Epithelial Homeostasis.  
1233 *Current Biology* 24, R815–R825.
- 1234 Madara, J.L. (1987). Intestinal absorptive cell tight junctions are linked to cytoskeleton. *American*  
1235 *Journal of Physiology-Cell Physiology* 253, C171–C175.
- 1236 Marianes, A., and Spradling, A.C. (2013). Physiological and stem cell compartmentalization within  
1237 the *Drosophila* midgut. *ELife* 2, 155.
- 1238 Martin, J.L., Sanders, E.N., Moreno-Roman, P., Jaramillo Koyama, L.A., Balachandra, S., Du, X.,  
1239 and O’Brien, L.E. (2018). Long-term live imaging of the *Drosophila* adult midgut reveals real-time  
1240 dynamics of division, differentiation and loss. *ELife* 7, e36248.
- 1241 McGuckin, M.A., Lindén, S.K., Sutton, P., and Florin, T.H. (2011). Mucin dynamics and enteric  
1242 pathogens. *Nature Reviews Microbiology* 9, 265–278.
- 1243 McGuire, S.E., Le, P.T., Osborn, A.J., Matsumoto, K., and Davis, R.L. (2003). Spatiotemporal rescue  
1244 of memory dysfunction in *Drosophila*. *Science* 302, 1765–1768.
- 1245 McKinley, K.L., Stuurman, N., Royer, L.A., Schartner, C., Castillo-Azofeifa, D., Delling, M., Klein,  
1246 O.D., and Vale, R.D. (2018). Cellular aspect ratio and cell division mechanics underlie the patterning  
1247 of cell progeny in diverse mammalian epithelia. *ELife* 7, e36739.



- 1248 McMahan, A., Supatto, W., Fraser, S.E., and Stathopoulos, A. (2008). Dynamic Analyses of Dro-  
1249 sophila Gastrulation Provide Insights into Collective Cell Migration. *Science* 322, 1546–1550.
- 1250 Meng, F.W., Rojas Villa, S.E., and Biteau, B. (2020). Sox100B Regulates Progenitor-Specific Gene  
1251 Expression and Cell Differentiation in the Adult Drosophila Intestine. *Stem Cell Reports* 14, 226–  
1252 240.
- 1253 Merzdorf, C.S., Chen, Y.-H., and Goodenough, D.A. (1998). Formation of Functional Tight Junc-  
1254 tions in Xenopus Embryos. *Developmental Biology* 195, 187–203.
- 1255 Micchelli, C.A., and Perrimon, N. (2006). Evidence that stem cells reside in the adult Drosophila  
1256 midgut epithelium. *Nature* 439, 475–479.
- 1257 Michael J. Evans, C.G.P., Laura S. Van Winkle, Michelle V. Fanucchi (2001). Cellular and Molecu-  
1258 lar Characteristics of Basal Cells in Airway Epithelium. *Experimental Lung Research* 27, 401–415.
- 1259 de Navascués, J., Perdigoto, C.N., Bian, Y., Schneider, M.H., Bardin, A.J., Martínez-Arias, A., and  
1260 Simons, B.D. (2012). Drosophila midgut homeostasis involves neutral competition between symmet-  
1261 rically dividing intestinal stem cells. *EMBO J* 31, 2473–2485.
- 1262 Nie, Y., Li, Q., Amcheslavsky, A., Duhart, J.C., Veraksa, A., Stocker, H., Raftery, L.A., and Ip, Y.T.  
1263 (2015). Bunched and Madm Function Downstream of Tuberous Sclerosis Complex to Regulate the  
1264 Growth of Intestinal Stem Cells in Drosophila. *Stem Cell Rev and Rep* 11, 813–825.
- 1265 O’Brien, L.E. (2013). Regional specificity in the Drosophila midgut: setting boundaries with stem  
1266 cells. *Cell Stem Cell* 13, 375–376.
- 1267 O’Brien, L.E., Zegers, M.M.P., and Mostov, K.E. (2002). Opinion: Building epithelial architecture:  
1268 insights from three-dimensional culture models. *Nat Rev Mol Cell Biol* 3, 531–537.
- 1269 O’Brien, L.E., Soliman, S.S., Li, X., and Bilder, D. (2011). Altered modes of stem cell division drive  
1270 adaptive intestinal growth. *Cell* 147, 603–614.
- 1271 Ohlstein, B., and Spradling, A. (2006). The adult Drosophila posterior midgut is maintained by plu-  
1272 ripotent stem cells. *Nature* 439, 470–474.
- 1273 Ohlstein, B., and Spradling, A. (2007). Multipotent Drosophila intestinal stem cells specify daughter  
1274 cell fates by differential Notch signaling. *Science* 315, 988–992.
- 1275 Overeem, A.W., Bryant, D.M., and van IJzendoorn, S.C.D. (2015). Mechanisms of apical–basal axis  
1276 orientation and epithelial lumen positioning. *Trends in Cell Biology* 25, 476–485.
- 1277 Parslow, A., Cardona, A., and Bryson-Richardson, R.J. (2014). Sample drift correction following 4D  
1278 confocal time-lapse imaging. *J Vis Exp* e51086–e51086.
- 1279 Pellettieri, J., and Alvarado, A.S. (2007). Cell turnover and adult tissue homeostasis: From humans to  
1280 planarians. *Annu Rev Genet* 41, 83–105.
- 1281 Perdigoto, C.N., Schweisguth, F., and Bardin, A.J. (2011). Distinct levels of Notch activity for com-  
1282 mitment and terminal differentiation of stem cells in the adult fly intestine. *Development* 138, 4585–  
1283 4595.

- 1284 Quan, Z., Sun, P., Lin, G., and Xi, R. (2013). TSC1/2 regulates intestinal stem cell maintenance and  
1285 lineage differentiation through Rheb–TORC1–S6K but independently of nutritional status or Notch  
1286 regulation. *J Cell Sci* *126*, 3884–3892.
- 1287 Rock, J.R., Onaitis, M.W., Rawlins, E.L., Lu, Y., Clark, C.P., Xue, Y., Randell, S.H., and Hogan,  
1288 B.L.M. (2009). Basal cells as stem cells of the mouse trachea and human airway epithelium. *Proceed-*  
1289 *ings of the National Academy of Sciences* *106*, 12771–12775.
- 1290 Ruiz-Herrero, T., Alessandri, K., Gurchenkov, B.V., Nassoy, P., and Mahadevan, L. (2017). Organ  
1291 size control via hydraulically gated oscillations. *Development* *144*, 4422–4427.
- 1292 Schindelin, J., Arganda-Carreras, I., Frise, E., Kaynig, V., Longair, M., Pietzsch, T., Preibisch, S.,  
1293 Rueden, C., Saalfeld, S., Schmid, B., et al. (2012). Fiji: an open-source platform for biological-image  
1294 analysis. *Nat Methods* *9*, 676–682.
- 1295 Sedzinski, J., Hannezo, E., Tu, F., Biro, M., and Wallingford, J.B. (2016). Emergence of an Apical  
1296 Epithelial Cell Surface In Vivo. *Developmental Cell* *36*, 24–35.
- 1297 Sedzinski, J., Hannezo, E., Tu, F., Biro, M., and Wallingford, J.B. (2017). RhoA regulates actin net-  
1298 work dynamics during apical surface emergence in multiciliated epithelial cells. *J Cell Sci* *130*, 420–  
1299 428.
- 1300 Sekiya, K., Futaesaku, Y., and Nakase, Y. (1988). Electron microscopic observations on tracheal epi-  
1301 thelia of mice infected with *Bordetella bronchiseptica*. *Microbiol. Immunol.* *32*, 461–472.
- 1302 Sigurbjörnsdóttir, S., Mathew, R., and Leptin, M. (2014). Molecular mechanisms of de novo lumen  
1303 formation. *Nat Rev Mol Cell Biol* *15*, 665–676.
- 1304 Stubbs, J.L., Davidson, L., Keller, R., and Kintner, C. (2006). Radial intercalation of ciliated cells  
1305 during *Xenopus* skin development. *Development* *133*, 2507–2515.
- 1306 Taniguchi, K., Shao, Y., Townshend, R.F., Cortez, C.L., Harris, C.E., Meshinchi, S., Kalantry, S., Fu,  
1307 J., O’Shea, K.S., and Gumucio, D.L. (2017). An apicosome initiates self-organizing morphogenesis  
1308 of human pluripotent stem cells. *J Cell Biol* *216*, 3981–3990.
- 1309 Tsujimura, A., Koikawa, Y., Salm, S., Takao, T., Coetzee, S., Moscatelli, D., Shapiro, E., Lepor, H.,  
1310 Sun, T.-T., and Wilson, E.L. (2002). Proximal location of mouse prostate epithelial stem cells : a  
1311 model of prostatic homeostasis. *Journal of Cell Biology* *157*, 1257–1265.
- 1312 Varadarajan, S., Stephenson, R.E., and Miller, A.L. (2019). Multiscale dynamics of tight junction re-  
1313 modeling. *J Cell Sci* *132*.
- 1314 Vasquez, C.G., Vachharajani, V.T., Garzon-Coral, C., and Dunn, A.R. (2021). Physical basis for the  
1315 determination of lumen shape in a simple epithelium. *Nature Communications*.
- 1316 Vega-Salas, D.E. (1988). Exocytosis of vacuolar apical compartment (VAC): a cell-cell contact con-  
1317 trolled mechanism for the establishment of the apical plasma membrane domain in epithelial cells.  
1318 *The Journal of Cell Biology* *107*, 1717–1728.
- 1319 Viitanen, A., Gullmets, J., Morikka, J., Katajisto, P., Mattila, J., and Hietakangas, V. (2021). An im-  
1320 age analysis method for regionally defined cellular phenotyping of the *Drosophila* midgut. *Cell Re-*  
1321 *ports Methods* 100059.

- 1322 Voiculescu, O., Bertocchini, F., Wolpert, L., Keller, R.E., and Stern, C.D. (2007). The amniote primi-  
1323 tive streak is defined by epithelial cell intercalation before gastrulation. *Nature* *449*, 1049–1052.
- 1324 Walck-Shannon, E., and Hardin, J. (2014). Cell intercalation from top to bottom. *Nat Rev Mol Cell*  
1325 *Biol* *15*, 34–48.
- 1326 Wang, A.Z., Ojakian, G.K., and Nelson, W.J. (1990). Steps in the morphogenesis of a polarized epi-  
1327 thelium. I. Uncoupling the roles of cell-cell and cell-substratum contact in establishing plasma mem-  
1328 brane polarity in multicellular epithelial (MDCK) cysts. *Journal of Cell Science* *95 (Pt 1)*, 137–151.
- 1329 Xiang, J., Bandura, J., Zhang, P., Jin, Y., Reuter, H., and Edgar, B.A. (2017). EGFR-dependent TOR-  
1330 independent endocycles support *Drosophila* gut epithelial regeneration. *Nat Commun* *8*, 15125.
- 1331 Xu, C., Tang, H.-W., Hung, R.-J., Hu, Y., Ni, X., Housden, B.E., and Perrimon, N. (2019). The Sep-  
1332 tate Junction Protein Tsp2A Restricts Intestinal Stem Cell Activity via Endocytic Regulation of aPKC  
1333 and Hippo Signaling. *Cell Rep* *26*, 670-688.e6.
- 1334 Yanagihashi, Y., Usui, T., Izumi, Y., Yonemura, S., Sumida, M., Tsukita, S., Uemura, T., and Fu-  
1335 ruse, M. (2012). A novel smooth septate junction-associated membrane protein, Snakeskin, is re-  
1336 quired for intestinal barrier function in *Drosophila*. *Journal of Cell Science* *125*, 1980–1990.
- 1337 Yang, Q., Xue, S.-L., Chan, C.J., Rempfler, M., Vischi, D., Maurer-Gutierrez, F., Hiiragi, T., Han-  
1338 nez, E., and Liberali, P. (2021). Cell fate coordinates mechano-osmotic forces in intestinal crypt for-  
1339 mation. *Nat Cell Biol* *23*, 733–744.
- 1340 Yu, H.H., and Zallen, J.A. (2020). Abl and Canoe/Afadin mediate mechanotransduction at tricellular  
1341 junctions. *Science* *370*.
- 1342

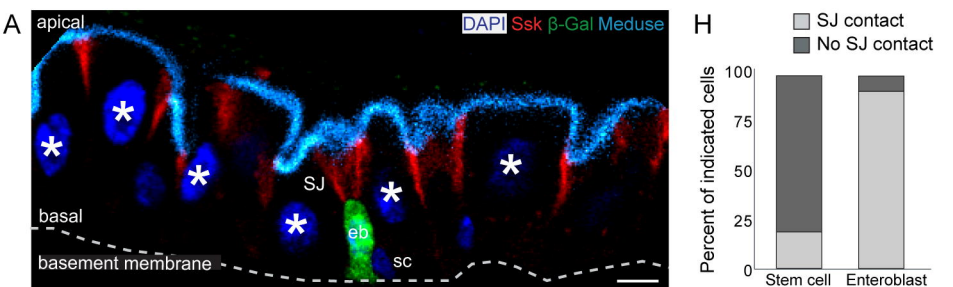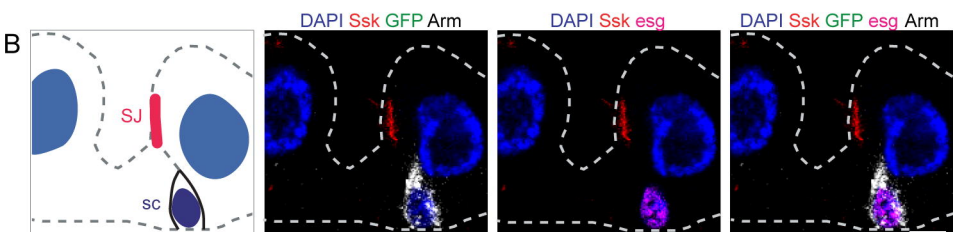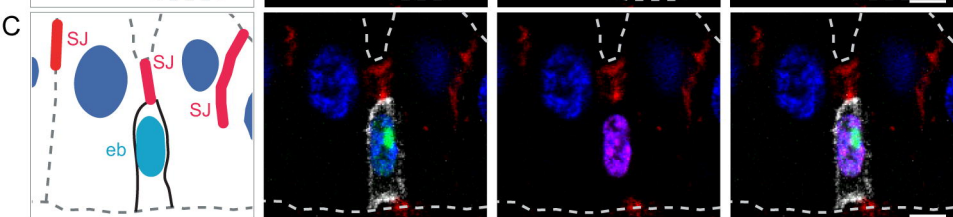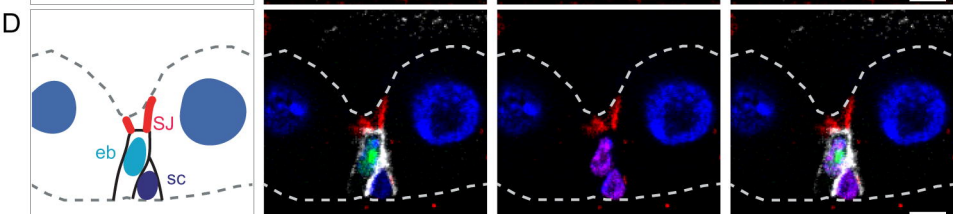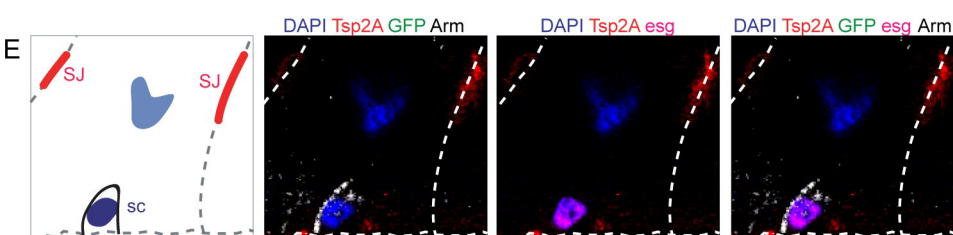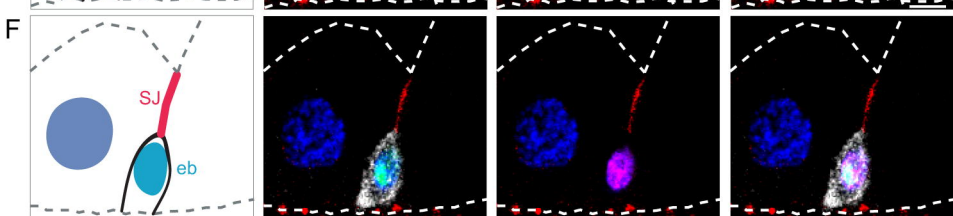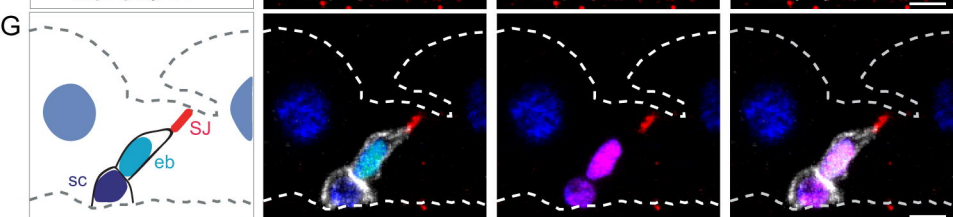

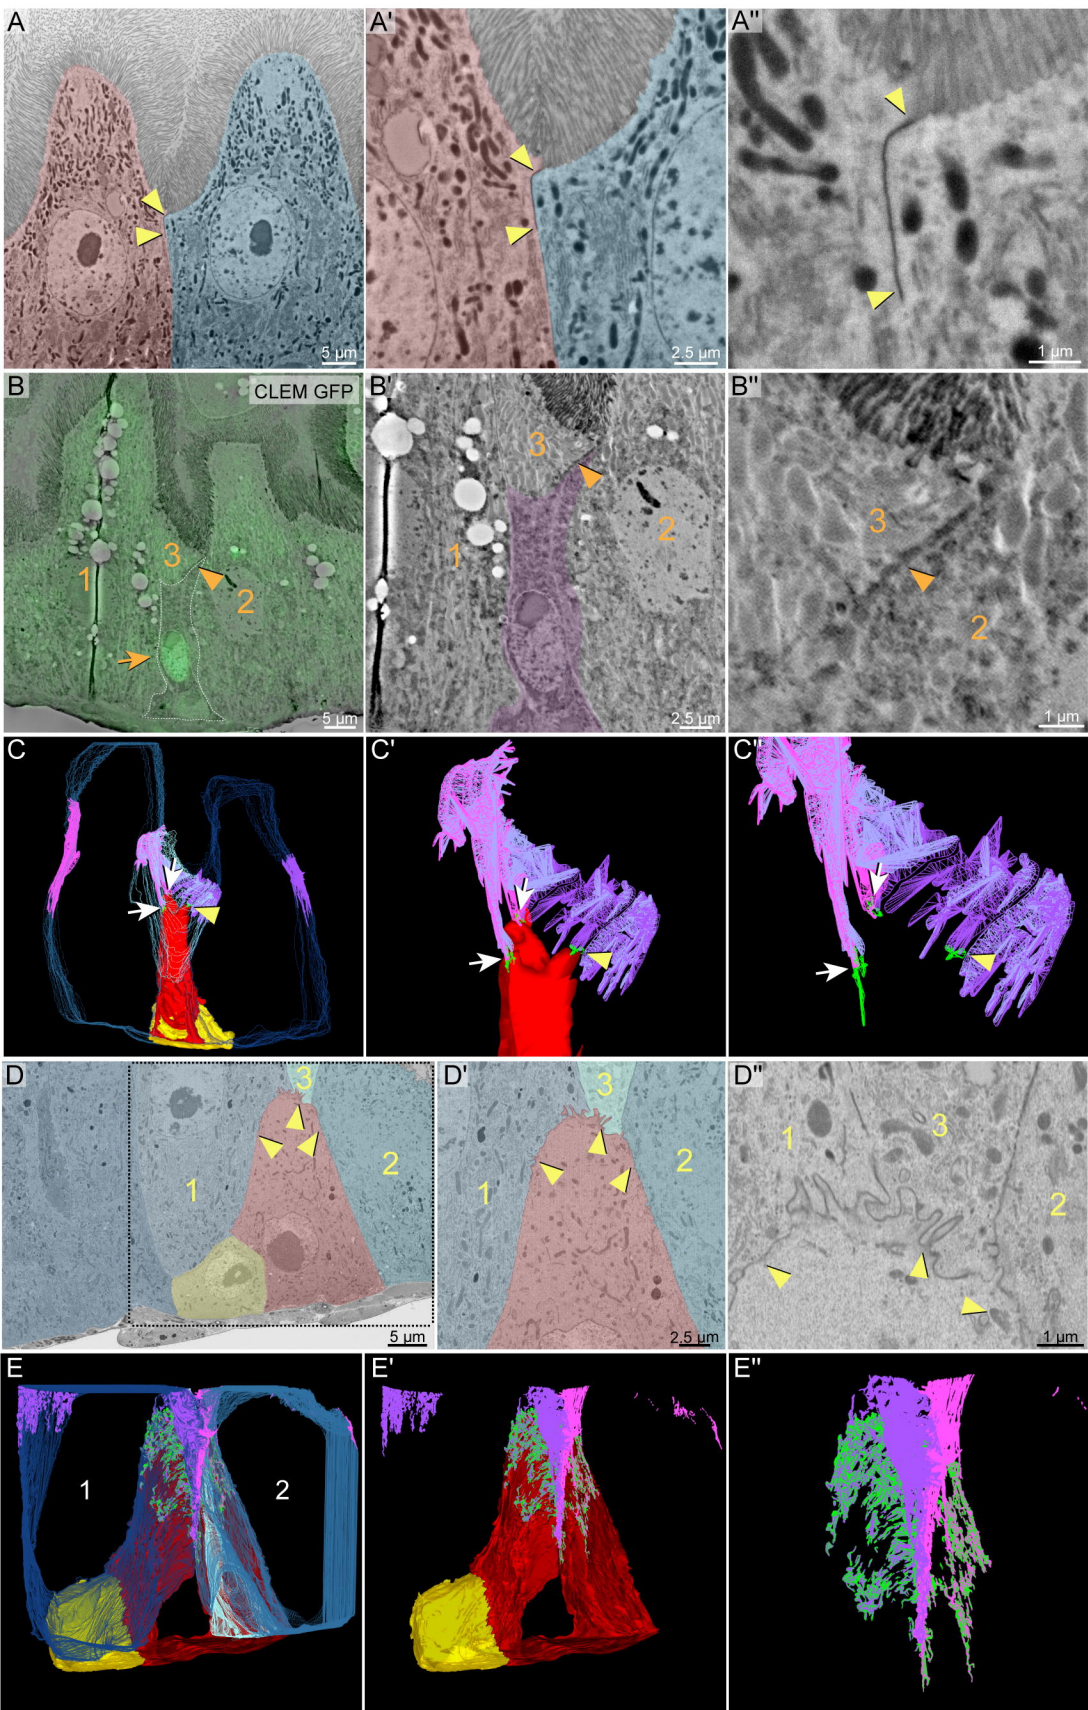

# Moreno-Roman\_Fig3

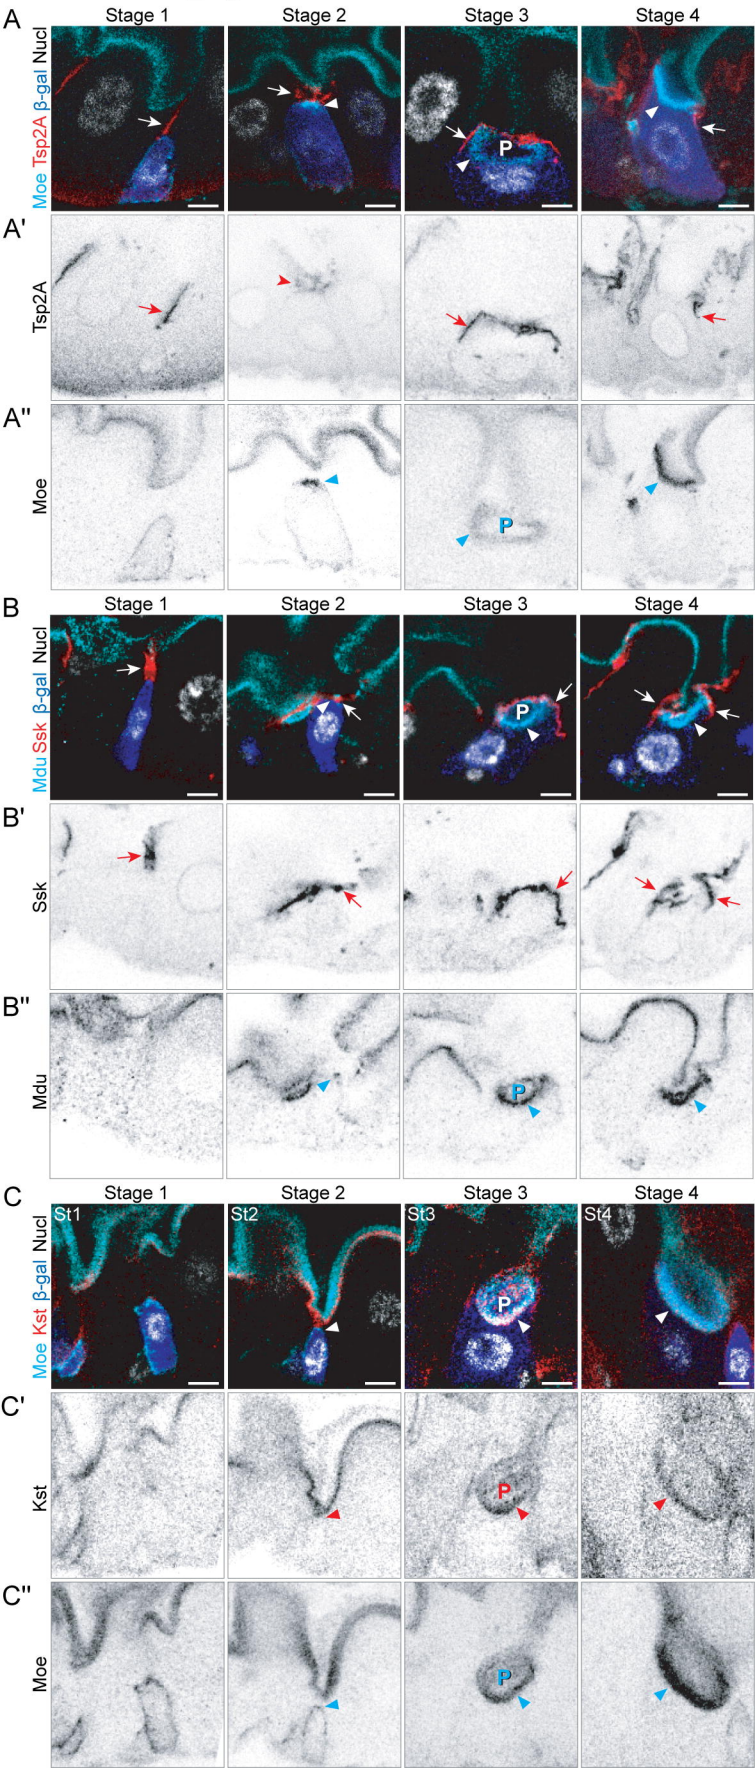

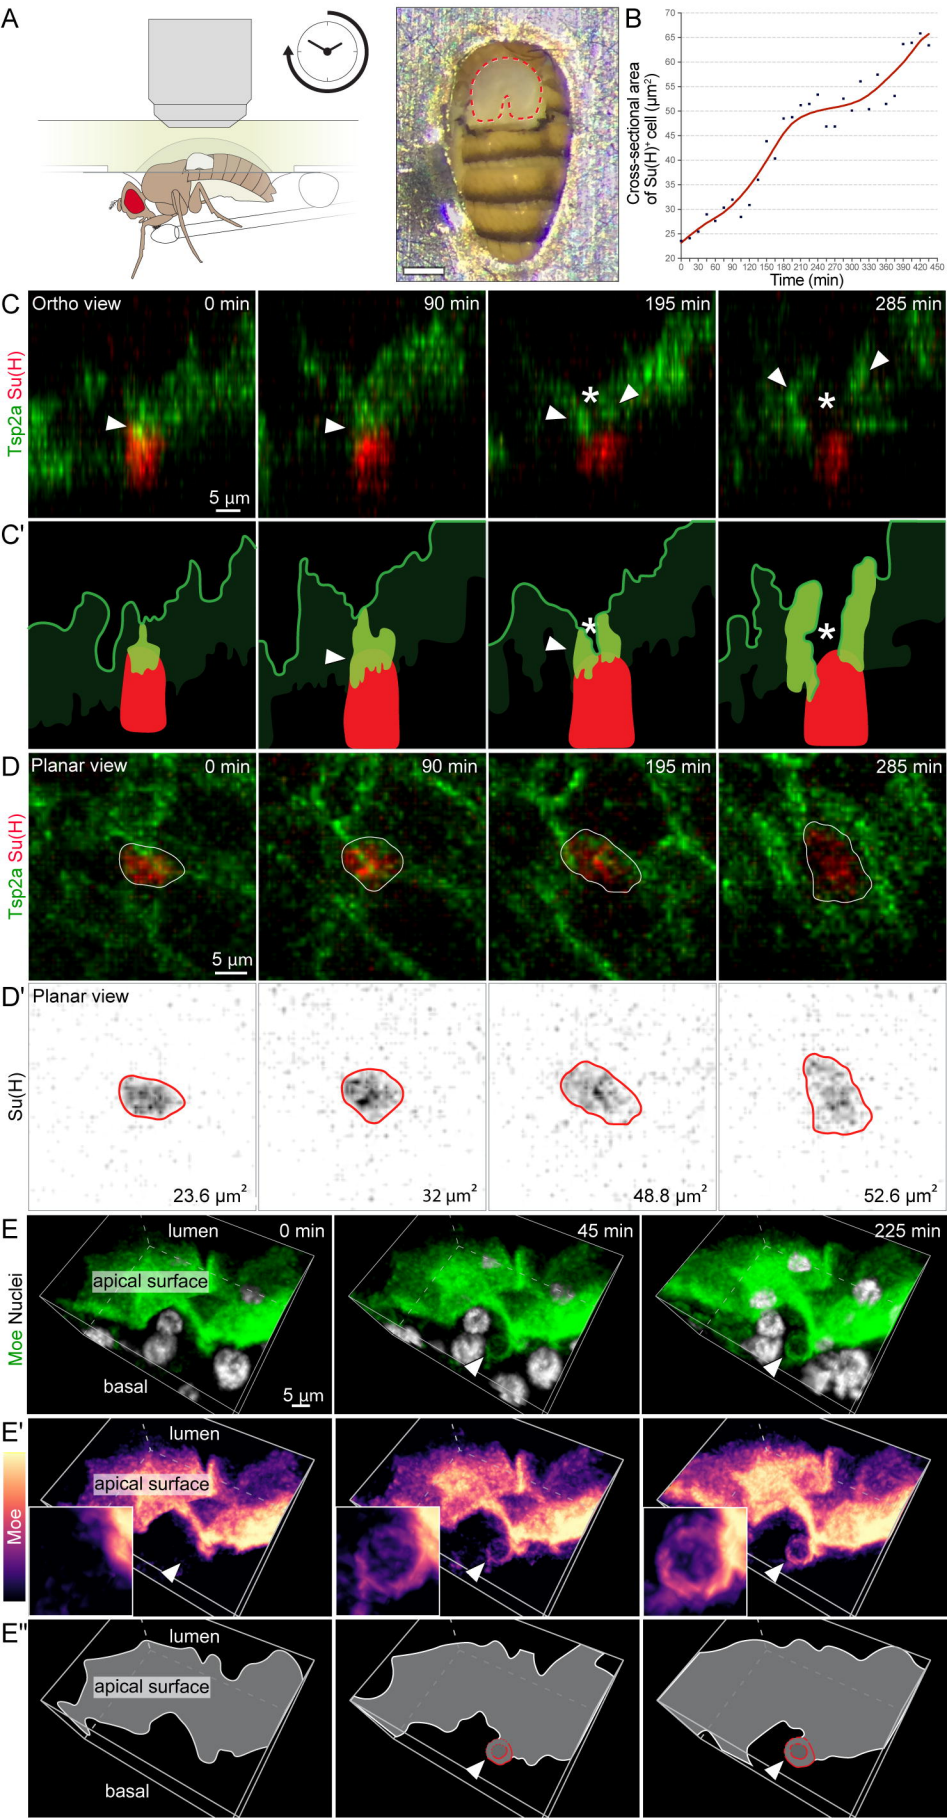

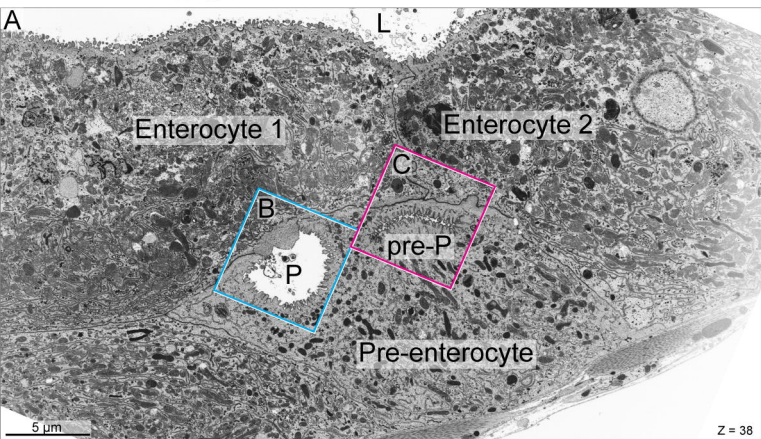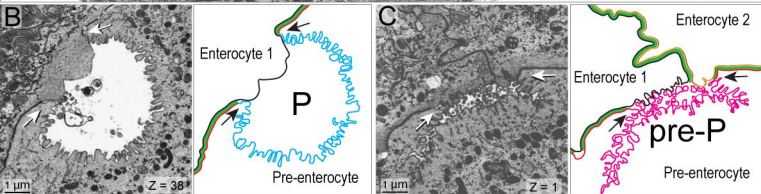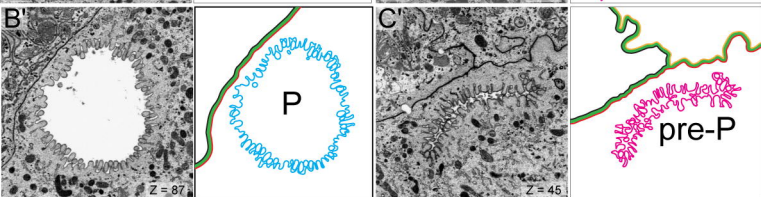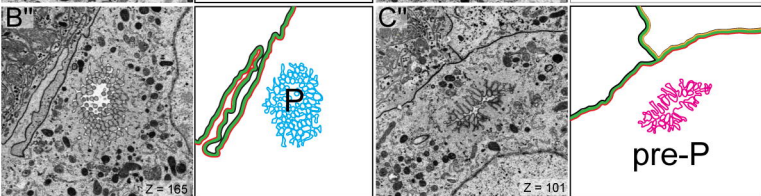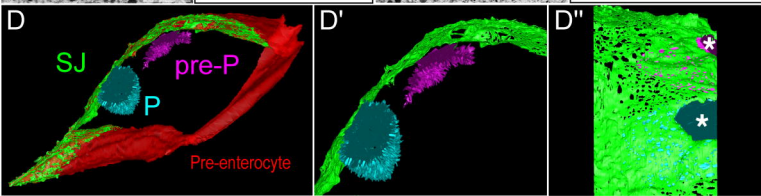



# Moreno-Roman\_Fig 6

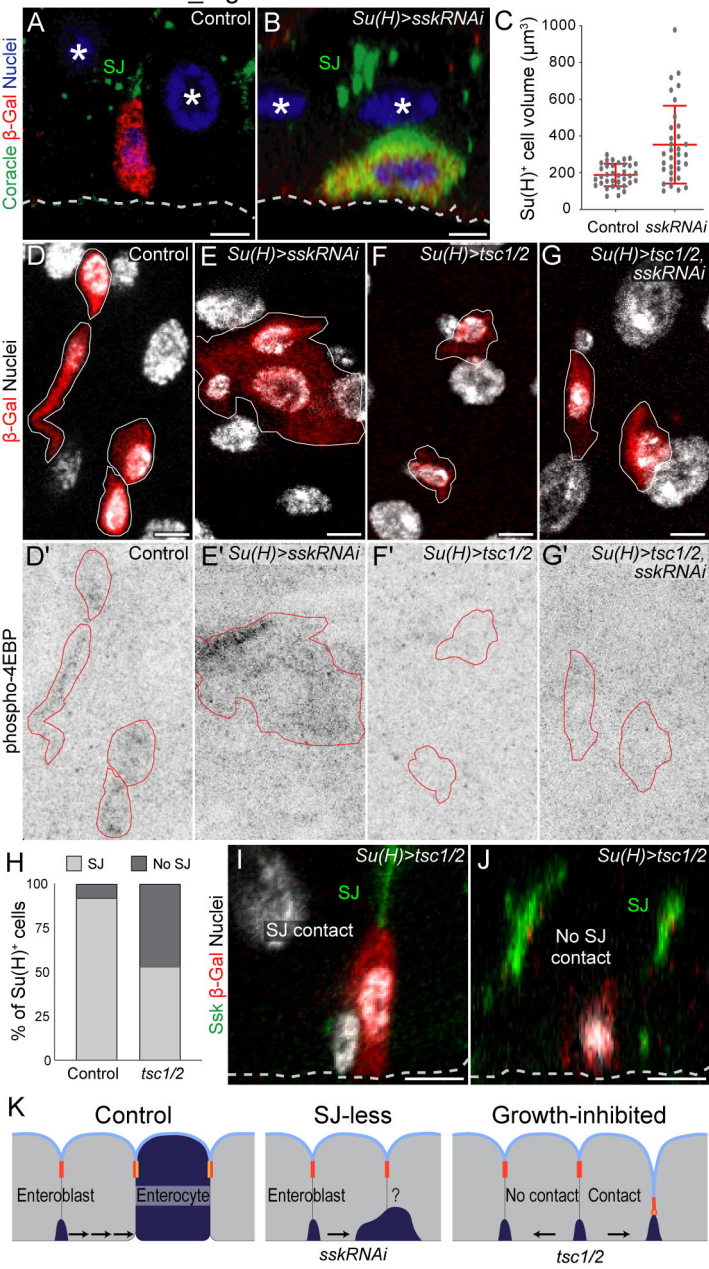

A

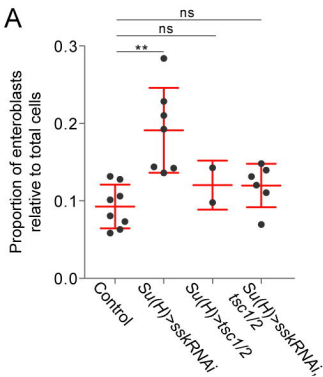

B

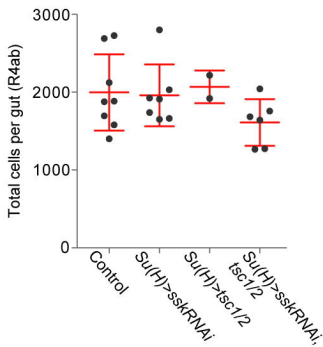

C

## Radial Intercalation

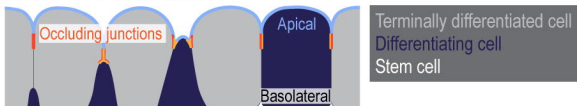

## Symmetric Inheritance

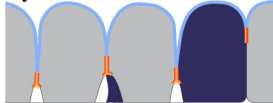

## PAAC-mediated Integration

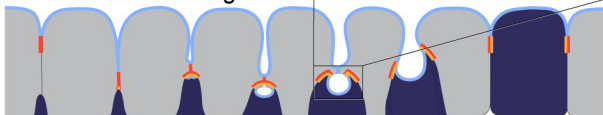

Time
